# Supplementary material for: Genomic Analyses Identify Novel Molecular Signatures Specific for the Caenorhabditis and other Nematode Taxa Providing Novel Means for Genetic and Biochemical Studies
Source: PubMed Central journal article supplement (PMC6826867; doi:10.3390/genes10100739), 2019-09-24
Supplement: genes-10-00739-s001.pdf [file genes-10-00739-s001.pdf]

**Table S1****Name and Accession Numbers of Proteins Used for Phylogenetic Analysis**

| <b>Protein Name</b>           | <b>Accession Number</b> | <b>Protein Length</b> |
|-------------------------------|-------------------------|-----------------------|
| Protein CBG25184              | CAS00939                | 1573 aa               |
| CBR-GDI-1 protein             | XP_002632610            | 444                   |
| CBR-SRI-18 protein            | XP_002637071            | 331                   |
| CBR-PQN-68 protein            | XP_002637004            | 150                   |
| CBR-PRS-1 protein             | XP_002643184            | 579                   |
| Hypothetical protein CBG16343 | XP_002643609            | 519                   |
| CBR-EPS-8 protein             | XP_002632592            | 918                   |
| Hypothetical protein CBG03002 | XP_002631206            | 361                   |
| CBR-ENOL-1 protein            | XP_002631372            | 434                   |
| CBR-GTA-1 protein             | XP_002633716            | 483                   |
| Hypothetical protein CBG04561 | XP_002637778            | 326                   |
| CBR-LFE-2 protein             | XP_002639970            | 393                   |
| CBR-OBR-1 protein             | XP_002641357            | 762                   |
| Hypothetical protein CBG18198 | XP_002642224            | 314                   |
| CBR-VPS-41 protein            | XP_002644672            | 898                   |
| CBR-RPL-13 protein            | XP_002646297            | 207                   |
| CBR-UNC-73 protein            | XP_002646360            | 1618                  |

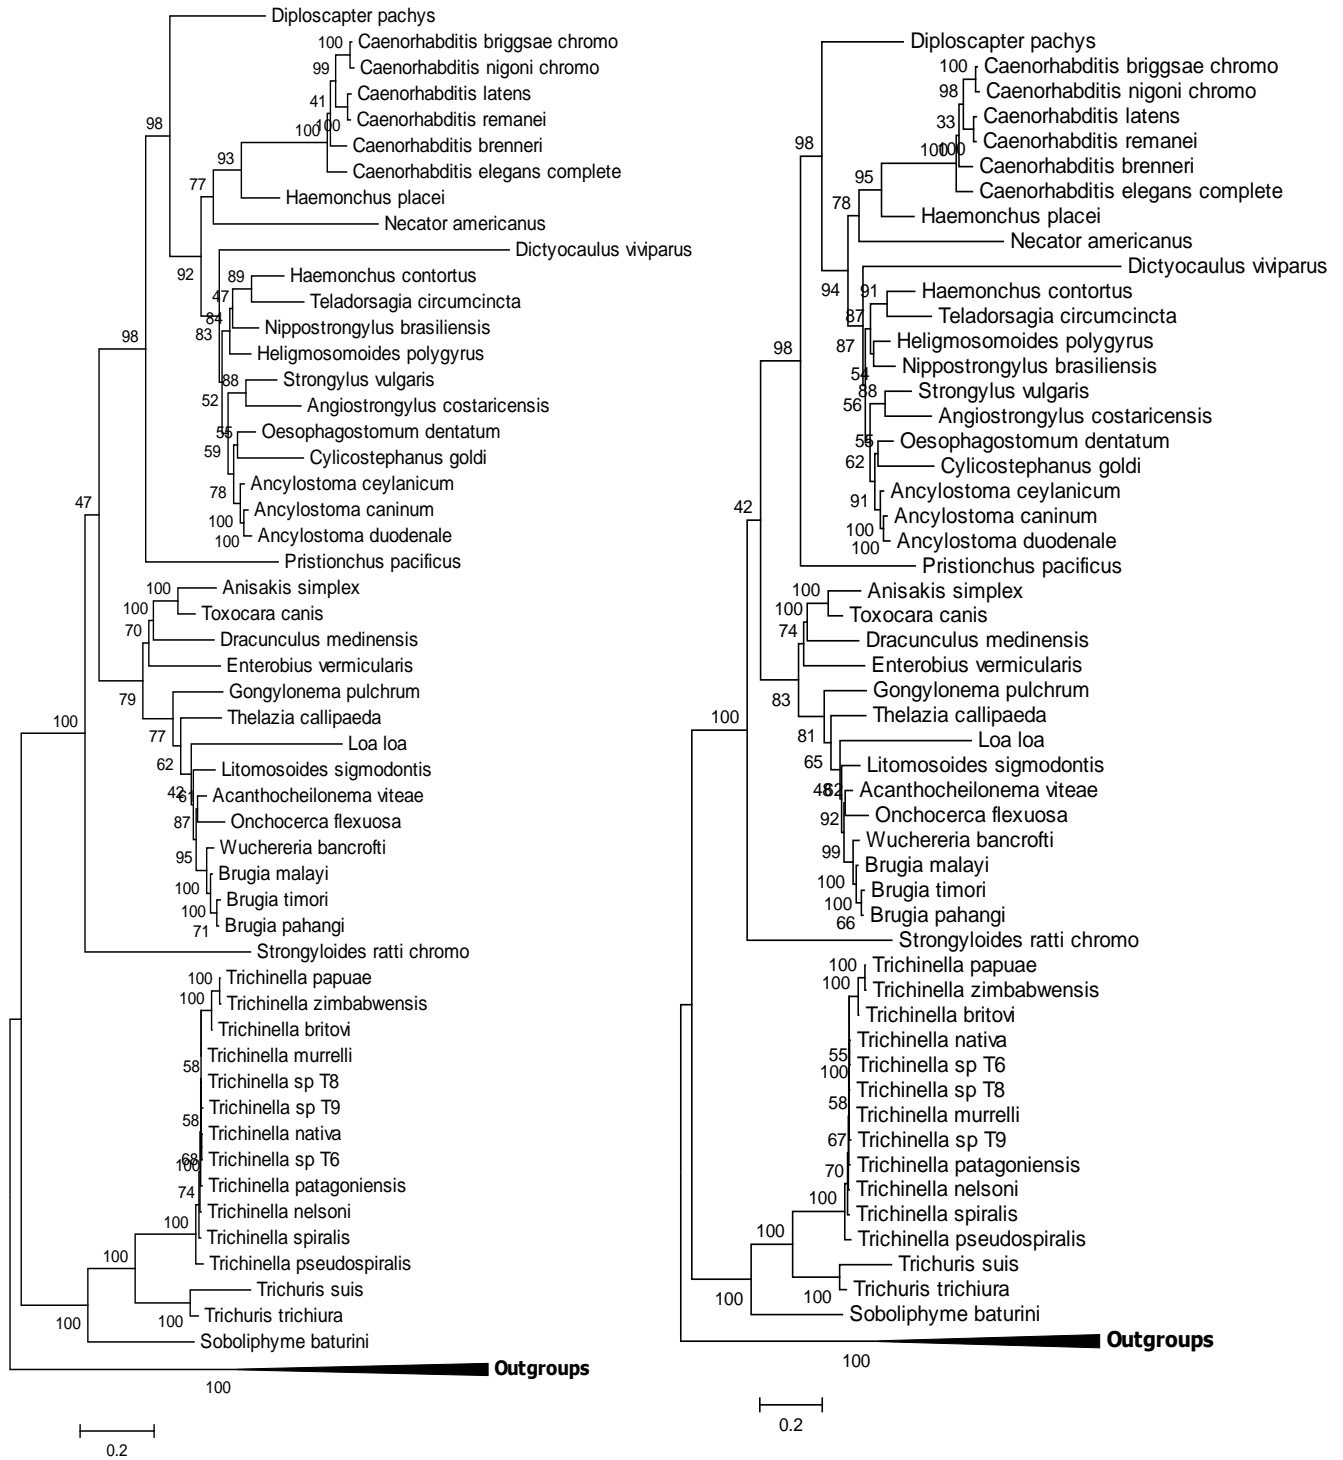

**Figure S1. Maximum Likelihood phylogenetic trees of the genome sequenced nematode species based on concatenated sequences of 17 conserved proteins.** The trees were constructed in MEGA6 using (A) Whelan and Goldman + Freq. and (B) JTT matrix-based models. Trees are based on 100 bootstrap replicates and rooted using sequences for Apicomplexa species as in Figure 1.

|                              |              |                                      | 233          | 263                  |              |                  |             |
|------------------------------|--------------|--------------------------------------|--------------|----------------------|--------------|------------------|-------------|
| Caenorhabditis<br>(6/6)      | {            | <i>Caenorhabditis elegans</i>        | AFP33163     | TIGVDFTVKTMKIP       | P            | NRAIAMQLWDTAGQER |             |
|                              |              | <i>Caenorhabditis brenneri</i>       | EGT41967     | -----                | -            | -----            |             |
|                              |              | <i>Caenorhabditis remanei</i>        | OZF92029     | -----                | -            | -----            |             |
|                              |              | <i>Caenorhabditis latens</i>         | OZF87495     | -----                | -            | -----            |             |
|                              |              | <i>Caenorhabditis briggsae</i>       | CAP21883     | -----                | A            | -----            |             |
|                              |              | <i>Caenorhabditis nigoni</i>         | PIC31209     | -----                | A            | -----            |             |
| Other<br>Nematodes<br>(0/48) | {            | <i>Toxocara canis</i>                | KHN75949     | -----                | IRLQ         | --VV-V-----      |             |
|                              |              | <i>Nippostrongylus brasiliensis</i>  | VDL82832     | -----                | MI--V-VD     | -DK-KL-I-----    |             |
|                              |              | <i>Gongylonema pulchrum</i>          | VDN36140     | -----                | MI--V-VN     | DDK-KL-I-----    |             |
|                              |              | <i>Oesophagostomum dentatum</i>      | KHJ84531     | -----                | I-VG         | --VV-L-----      |             |
|                              |              | <i>Wuchereria bancrofti</i>          | EJW79243     | -----                | IRLC         | --VV-I-----      |             |
|                              |              | <i>Ancylostoma duodenale</i>         | KIH53884     | -----                | I-VG         | S-VV-L-----      |             |
|                              |              | <i>Brugia pahangi</i>                | VDN91210     | -----                | IRLC         | --VV-V-----      |             |
|                              |              | <i>Strongylus vulgaris</i>           | VDM82877     | -----                | I-VG         | S-VV-L-----      |             |
|                              |              | <i>Brugia malayi</i>                 | CRZ23819     | -----                | IRLC         | --VV-V-----      |             |
|                              |              | <i>Brugia timori</i>                 | VDO25812     | -----                | IRLC         | --VV-V-----      |             |
|                              |              | <i>Necator americanus</i>            | XP_013308986 | -----                | I-VG         | S-VV-L-----      |             |
|                              |              | <i>Dictyocaulus viviparus</i>        | KJH46195     | -----                | TVG          | D-VV-L-----      |             |
|                              |              | <i>Enterobius vermicularis</i>       | VDD95818     | -----                | I-VK         | DKFV-V-----      |             |
|                              |              | <i>Ancylostoma caninum</i>           | RCN39681     | -----                | I-VG         | S-VV-L-----      |             |
|                              |              | <i>Dracunculus medinensis</i>        | VDN57676     | -----                | NIRLG        | --TV-V-----      |             |
|                              |              | <i>Heligmosomoides polygyrus</i>     | VDO22485     | -----                | ITVG         | D-VV-L-----      |             |
|                              |              | <i>Ancylostoma ceylanicum</i>        | EYC11435     | -----                | I-VG         | S-IV-L-----      |             |
|                              |              | <i>Angiostrongylus costaricensis</i> | VDM58536     | -----                | ICVG         | --VV-L-----      |             |
|                              |              | <i>Heterodera cruciferae</i>         | AMD33341     | -----                | LLVR         | E-MV-L-----      |             |
|                              |              | <i>Haemonchus placei</i>             | VD062950     | -----                | ITVG         | E-VV-L-----      |             |
|                              |              | <i>Acanthocheilonema viteae</i>      | VBB25686     | -----                | I--IRLC      | D-IV-V-----      |             |
|                              |              | <i>Onchocerca flexuosa</i>           | OZC09065     | ---                  | I--I--IHLY   | --VV-V-----      |             |
|                              |              | <i>Diploscapter pachys</i>           | PAV91080     | -----                | VQLK         | G-F--L-----      |             |
|                              |              | <i>Haemonchus contortus</i>          | CDJ88358     | -----                | ITVG         | E-VV-L-----      |             |
|                              |              | <i>Onchocerca ochengi</i>            | VDM94142     | -----                | I--IRLY      | D-VV-V-----      |             |
|                              |              | <i>Strongyloides ratti</i>           | XP_024499704 | -----                | IN-N         | DKKVTI-----      |             |
|                              |              | <i>Pristionchus pacificus</i>        | PDM64254     | -----                | VQLR         | D-LL-V-----      |             |
|                              |              | <i>Cylicostephanus goldi</i>         | VDK82117     | ---                  | I--LS--YLE   | D-TVRL-----      |             |
|                              |              | <i>Loa loa</i>                       | XP_003145161 | -----                | MI--V-VN     | DDK-KL-I-----    |             |
|                              |              | <i>Anisakis simplex</i>              | VDK63524     | -----                | MI--V-VG     | DDK-KL-I-----    |             |
|                              |              | <i>Soboliphyme baturini</i>          | VDP03528     | -----                | M--LI-D      | SKRVKL-I--G---   |             |
|                              |              | <i>Litomosoides sigmodontis</i>      | VDK79798     | -----                | MI--V-VN     | EDK-KL-I-----    |             |
|                              |              | <i>Teladorsagia circumcincta</i>     | PIO59286     | -----                | KIR-VD-D     | GQRVKL-I-----    |             |
|                              |              | <i>Thelazia callipaeda</i>           | VDM96437     | -----                | Y--FHLD      | HCVV-L-----      |             |
|                              |              | <i>Trichinella nelsoni</i>           | KRX14869     | ---                  | I--HM-IL-VE  | DQL--L-----      |             |
|                              |              | <i>Trichinella nativa</i>            | KRZ52102     | ---                  | I--HM-IL-VE  | DQL--L-----      |             |
|                              |              | <i>Trichinella sp. T6</i>            | KRX81729     | ---                  | I--HM-IL-VE  | DQL--L-----      |             |
|                              |              | <i>Trichinella pseudospiralis</i>    | KRY72075     | ---                  | I--HM-IL-VE  | DQL--L-----      |             |
|                              |              | <i>Trichinella spiralis</i>          | KRY29793     | ---                  | I--HM-IL-VE  | DQL--L-----      |             |
|                              |              | <i>Trichinella papuae</i>            | KRZ80298     | ---                  | I--HM-IL-VE  | DQL--L-----      |             |
|                              |              | <i>Trichinella britovi</i>           | KRY53573     | ---                  | I--HM-IL-VE  | DQL--L-----      |             |
|                              |              | <i>Trichinella zimbabwensis</i>      | KRZ14659     | ---                  | I--HM-IL-VE  | DQL--L-----      |             |
|                              |              | <i>Trichinella patagoniensis</i>     | KRY13850     | ---                  | I--HM-IL-VE  | DQL--L-----      |             |
|                              |              | <i>Trichuris suis</i>                | KHJ43420     | ---                  | I--HLRVL-VE  | DQL--L-----      |             |
|                              |              | <i>Trichuris trichiura</i>           | CDW52341     | ---                  | I--LS--YLE   | D-TVRL-----      |             |
|                              |              | Outgroups<br>(0/>100)                | {            | <i>Homo sapiens</i>  | NP_001138430 | -V-I-YR--LNVD    | -SQV-L----- |
|                              |              |                                      |              | <i>Mus musculus</i>  | XP_006506407 | -V-I-YR--VTVD    | -AQV-L----- |
|                              |              |                                      |              | <i>Babesia bovis</i> | BAN65758     | -----            | KI--V--D    |
| <i>Hydra vulgaris</i>        | XP_012556792 |                                      |              | -----                | Q--LE-C      | -NW--L-----      |             |

**Supplementary Figure 2A.** Partial sequence alignments of the protein Rab-44 with a CSI consisting of a 1 aa insertion (shown in black box) that is specific for the *Caenorhabditis* genus and not present in any other nematode species. *T. canis*, *G. pulchrum* and *N. brasiliensis* contains second homologs which contain this CSI.

|                           |                                    | 411                                   | 454                                               |
|---------------------------|------------------------------------|---------------------------------------|---------------------------------------------------|
| Caenorhabditis<br>(6/6)   | <i>Caenorhabditis elegans</i>      | NP_001023137                          | FSSYTG YGHTLKWAE LQPNHS RQNTN EFRDRFGR LRVETIAIDA |
|                           | <i>Caenorhabditis remanei</i>      | XP_003093608                          | Y---D---KS---KP---EDA D--DS SL--KY---P-----       |
|                           | <i>Caenorhabditis brenneri</i>     | EGT38432                              | ---D---TST---RP-K-K-A ---EP SN--KY-----           |
|                           | <i>Caenorhabditis briggsae</i>     | XP_002647141                          | Y-G---ANK---RP-SGRYA ---DA RL--KY-----V----       |
|                           | <i>Caenorhabditis nigoni</i>       | PIC17744                              | Y-G---ARD---HP-T-RYA ---DT RL--KY-----T----       |
|                           | <i>Caenorhabditis latens</i>       | OZG17769                              | PKPKPAPRK---KA---EDA D--DT SL--KY---P-----        |
| Other Nematodes<br>(0/21) | <i>Diploscapter pachys</i>         | PAV64174                              | ---S-----N-KQYDNFGK E KT-NE---INNIM-----          |
|                           | <i>Gongylonema pulchrum</i>        | VDK27510                              | -----P-FR-QRMEHED- TP-----LC-LV----               |
|                           | <i>Haemonchus contortus</i>        | CDJ80847                              | Y---F---GS-Q--PFEDFDR -P--K---V-C-LV-M--          |
|                           | <i>Onchocerca ochengi</i>          | VDK68310                              | --D-D---SSFR-RPMKMM-- FP----N--CC-LV----          |
|                           | <i>Onchocerca flexuosa</i>         | OZC09105                              | --D-D---SSFR-RPMKMM-- FP----N--CC-LV----          |
|                           | <i>Dictyocaulus viviparus</i>      | KJH49243                              | H--I---E--Q--PYEEYG- -S--K-C-VKC-VV-M--           |
|                           | <i>Toxocara canis</i>              | VDM38707                              | Y-D-E---DSFQ-YP-HSPDP LS----E---C-MV----          |
|                           | <i>Brugia timori</i>               | VDO13221                              | --D-N---SSFR-RPMEKMD- FP----N--CC-LV----          |
|                           | <i>Brugia malayi</i>               | XP_001897754                          | --D-N---SSFR-RPMEKMD- FP----N--CC-LV----          |
|                           | <i>Anisakis simplex</i>            | VDK26367                              | Y-D-A---NSFQ-YP-HAPEA LS----E---HC-LV----         |
|                           | <i>Brugia pahangi</i>              | VDN90162                              | --D-N---SSFR-RPMEKMD- FP----N--CC-LV----          |
|                           | <i>Oesophagostomum dentatum</i>    | KHJ76834                              | Y-D-I---E--E-SP-ENYGD -P--E-R-VIC-VV-M--          |
|                           | <i>Ancylostoma duodenale</i>       | KIH62945                              | Y-D-----E--E--R-ENYGF -P--C-R-VIC-VV-M--          |
|                           | <i>Ancylostoma ceylanicum</i>      | EPB77283                              | Y-D-----E--E--R-ENYGF -P--C-R-VIC-VV-M--          |
|                           | <i>Wuchereria bancrofti</i>        | EJW76497                              | --D-N---PSFR-RPMEKVD- FP----N--CC-LV----          |
|                           | <i>Ancylostoma caninum</i>         | RCN39092                              | Y--S---K----LPFEGYG- -P--E-R-VICNVV-M--           |
|                           | <i>Thelazia callipaeda</i>         | VDN02538                              | --N-V---SSFR-CPMEIKNP LP----R--CC-LV-M--          |
|                           | <i>Necator americanus</i>          | XP_013299999                          | Y-D-F---E--E-NQ-EDYG- -P--E-L-VIS-VV-M--          |
|                           | <i>Loa loa</i>                     | XP_020303580                          | --G-D---SSFR-RPMEKMD- FP----H--CC-LV----          |
|                           | <i>Litomosoides sigmodontis</i>    | VDK84342                              | --D-S---SSFR-RPRRKVD- FP----N--CC-LV----          |
|                           | <i>Acanthocheilonema viteae</i>    | VBB29553                              | --D-S---SSFC-RPMVKAD- FP----N--CC-LV----          |
| Outgroups<br>(0/>200)     | <i>Homo sapiens</i>                | NP_001290415                          | Y-E---AE-YR-SRSHEDG- E--DWQ-RCT-IV----            |
|                           | <i>Mus musculus</i>                | NP_001346844                          | Y-E---AE-YR--RSHEDG- EK-DWQ-RCT-IV----            |
|                           | <i>Pocillopora damicornis</i>      | RMX52245                              | Y-D---A--FR--GNHSDRT T--SW--RHSKIV----            |
|                           | <i>Exaoptasia pallida</i>          | XP_020892460                          | Y-D---A--F--GNHDDQT P--SW--RHCQVV----             |
|                           | <i>Stylophora pistillata</i>       | PFX34124                              | Y-D---A--FR--GNHSDRT T--SW--RHSKIV----            |
|                           | <i>Acropora millepora</i>          | XP_029187629                          | --D-E--A--FR--GNHVDQV T--SW--RCCSIV----           |
|                           | <i>Seriola dumerili</i>            | XP_022625279                          | --V-S-F-DSFE--GPHQDRL D--EW--KRQIL----            |
|                           | <i>Cyprinodon variegatus</i>       | XP_015238624                          | Y-K---SQ-Y--GSHQDTT P--DW--RCT-IV----             |
|                           | <i>Seriola lalandi dorsalis</i>    | XP_023268207                          | --V-S-F-DSF--GPHRD-L D--GW--KRQIL----             |
|                           | <i>Danaus plexippus plexippus</i>  | OWR43927                              | Y-T-S---SFS-GSNYNDIT P--SS--K-TAVL----            |
|                           | <i>Notothenia coriiceps</i>        | XP_010772468                          | --N-S-F-D-FQ-KGPHEERL N--EWA--QRQIV----           |
|                           | <i>Xenopus tropicalis</i>          | XP_017950760                          | Y-E---SE-Y--RVHEDE- P--EWQ-RTT-IV----             |
|                           | <i>Bicyclus anynana</i>            | XP_023940579                          | --T-----SFQ--GDFADET PY--SS--R-CAVL----           |
|                           | <i>Perca flavescens</i>            | XP_028456875                          | --L-S---E-FE--GPYEDRL D--EWA--KRQIL----           |
|                           | <i>Blyttiomycetes helicus</i>      | RK090865                              | --D-E---D-F--KGPHEDLA P--ALC--KT-I--V--           |
|                           | <i>Vanessa tameamea</i>            | XP_026483100                          | Y-K-S---SFQ--GEHVDAT P--SS--R-CAVL----            |
|                           | <i>Myotis lucifugus</i>            | XP_023617070                          | Y-E---AE-YR--RSHEDGN E--DWQ-RST-IV----            |
|                           | <i>Myotis brandtii</i>             | XP_014386202                          | Y-E---AE-YR--RSHEDGN E--DWQ-RST-IV----            |
|                           | <i>Mizuhopecten yessoensis</i>     | XP_021376375                          | --D-D--AR-FR-K-NYEDKT P--NW--CTDVV----            |
|                           | <i>Acanthochromis polyacanthus</i> | XP_022064719                          | --C-S-F-DSFE--GPHEE-L K--AWA--KRQIL----           |
|                           | <i>Orbicella faveolata</i>         | XP_020608915                          | Y-D-I--A--FR--GDHVDET T--SW--RHSKIV----           |
| <i>Xenopus laevis</i>     | NP_001089602                       | Y-E---SE-Y--CVHEDE- P--EWQ-RTT-IV---- |                                                   |

**Supplementary Figure 2B.** Partial sequence alignments of a Poly ADP-ribose Glycohydrolase protein with a CSI consisting of a 5 aa insertion (shown in black box) that is specific for the *Caenorhabditis* genus and not present in any other nematode species.

|                           |                              | 389          | 420                                  |
|---------------------------|------------------------------|--------------|--------------------------------------|
| Caenorhabditis<br>(5/5)   | Caenorhabditis elegans       | NP_001022057 | RVTNVFSILMNGL                        |
|                           | Caenorhabditis briggsae      | XP_002629728 | -----                                |
|                           | Caenorhabditis nigoni        | PIC43332     | -----                                |
|                           | Caenorhabditis brenneri      | EGT38253     | -----                                |
|                           | Caenorhabditis remanei       | XP_003097265 | -----                                |
| Other Nematodes<br>(0/26) | Loa loa                      | XP_003143505 | -L--W---SQ-- RI AP-EAPTT-Y---K-I---  |
|                           | Onchocerca ochengi           | VDN00454     | -L--WY---SQ-- RI AP-EAPVS-Y---K-I--- |
|                           | Wuchereria bancrofti         | VDM21799     | -L--WY---SQ-- RI AP-EAPAT-Y---K-I--- |
|                           | Pristionchus pacificus       | PDM64980     | -LS-F-G--SQ-- RI AP-EAPST-Y---K----  |
|                           | Diploscapter pachys          | PAV91078     | -LA-W---TQ-- RI AP-EAPMT-Y---K-I---  |
|                           | Enterobius vermicularis      | VDD85971     | -I--WYG--SQ-- RV AP-EAPST-F---K-I--- |
|                           | Anisakis simplex             | VDK59352     | -L--WYG--SQ-- RI AP-EAPST-Y---K----  |
|                           | Heligmosomoides polygyrus    | VDO67729     | --S-FYN--SH-- RI AP-EVPLT-F---K----  |
|                           | Trichoplax adhaerens         | XP_002109067 | ----FVG--SQ-- RI AP-EAPVT-Y---K----  |
|                           | Soboliphyme baturini         | VDP00762     | -LV-WY---CS-- KI AP-EAPST-Y---K-I--- |
|                           | Brugia pahangi               | VDN89517     | -L--WY---SQ-- RI APLEAPKT-Y---K-I--- |
|                           | Brugia timori                | VDO24680     | -L--WY---SQ-- RI APLEAPKT-Y---K-I--- |
|                           | Brugia malayi                | XP_001893054 | -L--WY---SQ-- RI APLEAPKT-Y---K-I--- |
|                           | Schistosoma margrebowiei     | VDO49046     | -L--WVG--GR-- QI AP-EAPSS-Y---K----  |
|                           | Schistosoma mattheei         | VDP63272     | -L--WVG--GR-- QI AP-EAPSS-Y---K----  |
|                           | Nippostrongylus brasiliensis | VDL70778     | --S-FYN--SH-- RI AP-EVPLT-Y---K----  |
|                           | Trichuris suis               | KHJ46115     | -NS-YAG--CQ-- RI AP-EAPVT-Y---K-I--- |
|                           | Trichinella nelsoni          | KRX19541     | -LS-FVG-ISQ-- RI AP-ESLTS-H---K-I--- |
|                           | Trichinella patagoniensis    | KRY16608     | -LS-FVG-ISQ-- RI AP-ESLTS-H---K-I--- |
|                           | Trichinella murrelli         | KRX42668     | -LS-FVG-ISQ-- RI AP-ESLTS-H---K-I--- |
|                           | Trichinella spiralis         | KRY39132     | -LS-FVG-ISQ-- RI AP-ESLTS-H---K-I--- |
|                           | Trichinella sp. T8           | KRZ84918     | -LS-FVG-ISQ-- RI AP-ESLTS-H---K-I--- |
|                           | Trichinella britovi          | KRY54119     | -LS-FVG-ISQ-- RI AP-ESLTS-H---K-I--- |
|                           | Trichinella sp. T6           | KRX77647     | -LS-FVG-ISQ-- RI AP-ESLTS-H---K-I--- |
|                           | Trichinella nativa           | OUC43219     | -LS-FVG-ISQ-- RI AP-ESLTS-H---K-I--- |
|                           | Trichinella zimbabwensis     | KRZ17851     | -LS-FVG-ISQ-- RI AP-ESLTS-H---K-I--- |
| Outgroups<br>(0/>100)     | Homo sapiens                 | 1UK0_A       | T--FAG--SQ-- RI AP-EAPVT-Y---K-I---  |
|                           | Mus musculus                 | AAF61293     | T--FAG--SQ-- RI AP-EAPVT-Y---K-I---  |

**Supplementary Figure 3.** Partial sequence alignments of a Poly (ADP-ribose) polymerase 2 protein with a CSI consisting of a 2 aa deletion (shown in black box) that is specific for the *Caenorhabditis* genus and not present in any other nematode species. The sequence alignment of the species *Caenorhabditis latens* was not observed in the BLASTP search.

|                              |                                      | 186          | 207                       |
|------------------------------|--------------------------------------|--------------|---------------------------|
| Caenorhabditis<br>(6/6)      | <i>Caenorhabditis remanei</i>        | OZF80352     | GVAIICKSS SSKFKLVLFDKEG   |
|                              | <i>Caenorhabditis nigoni</i>         | PIC39710     | -----                     |
|                              | <i>Caenorhabditis brenneri</i>       | EGT45655     | -----                     |
|                              | <i>Caenorhabditis latens</i>         | OZG18293     | -----                     |
|                              | <i>Caenorhabditis elegans</i>        | NP_001254891 | -----                     |
|                              | <i>Caenorhabditis briggsae</i>       | XP_002642541 | -----                     |
| Other<br>Nematodes<br>(0/40) | <i>Diploscapter pachys</i>           | PAV60060     | -ISV--R-T S F-----RD-     |
|                              | <i>Teladorsagia circumcincta</i>     | PIO53971     | -IC-V---A S -----         |
|                              | <i>Dictyocaulus viviparus</i>        | KJH48665     | -IC-V---P S -----         |
|                              | <i>Angiostrongylus costaricensis</i> | VDM62769     | -IC-V---P S -----         |
|                              | <i>Brugia timori</i>                 | VDO44364     | -LMV--R-A Q M-----        |
|                              | <i>Wuchereria bancrofti</i>          | EJW80584     | -LMV--R-A Q M-----        |
|                              | <i>Brugia malayi</i>                 | XP_001900908 | -LMV--R-A Q M-----        |
|                              | <i>Pristionchus pacificus</i>        | PDM62666     | --S-V---P S M-----RD-     |
|                              | <i>Anisakis simplex</i>              | VDK63706     | -LM-----A Q M-----        |
|                              | <i>Dracunculus medinensis</i>        | VDN52079     | -LM-M---P Q M-----        |
|                              | <i>Soboliphyme baturini</i>          | VDO93050     | -IVLV-R-H S E----II-----  |
|                              | <i>Onchocerca flexuosa</i>           | OZC07009     | -LM--R-M Q M-----         |
|                              | <i>Onchocerca ochengi</i>            | VDK87080     | -LM--R-M Q M-----         |
|                              | <i>Acanthocheilonema viteae</i>      | VBB26716     | -LM--R-M Q M-----         |
|                              | <i>Enterobius vermicularis</i>       | VDD88357     | -IM-----I Q M-----        |
|                              | <i>Loa loa</i>                       | XP_020303998 | -LMV--R-M Q M-----        |
|                              | <i>Litomosoides sigmodontis</i>      | VDK80743     | -LMV--R-M Q M-----        |
|                              | <i>Thelazia callipaeda</i>           | VDN08491     | -LM--R-F Q M-----F----    |
|                              | <i>Strongyloides ratti</i>           | XP_024507239 | -IIVRVS-A S M-----II---D- |
|                              | <i>Oesophagostomum dentatum</i>      | KHJ79345     | -IC-V--- S -----          |
|                              | <i>Haemonchus placei</i>             | VDO41032     | -IC-V--- S -----          |
|                              | <i>Haemonchus contortus</i>          | CDJ87271     | -IC-V--- S -----          |
|                              | <i>Heligmosomoides polygyrus</i>     | VDO90444     | -IC-V--- S -----          |
|                              | <i>Necator americanus</i>            | XP_013300303 | -IC-V--- S -----          |
|                              | <i>Nippostrongylus brasiliensis</i>  | VDL82817     | -IC-V--- S -----          |
|                              | <i>Gongylonema pulchrum</i>          | VDN22375     | -LM--R-M Q M-----EMSKF    |
|                              | <i>Toxocara canis</i>                | VDM47619     | -LM--R-A Q M-----D----    |
|                              | <i>Trichuris suis</i>                | KFD58118     | -II-S-R-- S M-----RD-     |
|                              | <i>Trichinella nelsoni</i>           | KRX21170     | -II-S-R-T D M-----I-----  |
|                              | <i>Trichinella nativa</i>            | OUC45935     | -II-S-R-T D M-----I-----  |
|                              | <i>Trichinella pseudospiralis</i>    | KRY85173     | -II-S-R-T D M-----I-----  |
|                              | <i>Trichinella papuae</i>            | 95459948     | -II-S-R-T D M-----I-----  |
|                              | <i>Trichinella zimbabwensis</i>      | KRZ11165     | -II-S-R-T D M-----I-----  |
|                              | <i>Trichinella patagoniensis</i>     | KRY22341     | -II-S-R-T D M-----I-----  |
|                              | <i>Trichinella sp. T6</i>            | KRX75581     | -II-S-R-T D M-----I-----  |
|                              | <i>Trichinella sp. T8</i>            | KRZ86851     | -II-S-R-T D M-----I-----  |
|                              | <i>Trichinella britovi</i>           | KRY49360     | -II-S-R-T D M-----I-----  |
|                              | <i>Trichinella spiralis</i>          | KRY33941     | -II-S-R-T D M-----I-----  |
|                              | <i>Trichinella murrelli</i>          | KRX41356     | -II-S-R-T D M-----I-----  |
|                              | <i>Trichuris trichiura</i>           | CDW57381     | -II-S-R-- S M-----RD-     |

**Supplementary Figure 4.** Partial sequence alignments of a DnaJ-domain containing chaperone protein with a CSI consisting of a 1 aa deletion (shown in black box) that is specific for the *Caenorhabditis* genus and not present in any other nematode species. Homologous sequences for this protein were not observed for non-nematode organisms in BLASTP search.

|                           |                                      | 456          | 487                                       |
|---------------------------|--------------------------------------|--------------|-------------------------------------------|
| Caenorhabditis<br>(6/6)   | <i>Caenorhabditis elegans</i>        | NP_001254914 | GELK <b>IADLGLARLW</b> EKESRLYTNRVITLWYRP |
|                           | <i>Caenorhabditis remanei</i>        | POM37359     | ----- Q-----                              |
|                           | <i>Caenorhabditis latens</i>         | OZG10685     | ----- Q-----                              |
|                           | <i>Caenorhabditis brenneri</i>       | EGT52238     | ----- Q-----                              |
|                           | <i>Caenorhabditis nigoni</i>         | PIC37815     | ----- Q-----N-----                        |
|                           | <i>Caenorhabditis briggsae</i>       | XP_002642141 | ----- Q-----N-----                        |
| Other Nematodes<br>(0/43) | <i>Diploscapter pachys</i>           | PAV78157     | -----F----RF Y ADQQ-P-----                |
|                           | <i>Strongyloides ratti</i>           | XP_024506005 | --I-L-F----FY N --QK-----                 |
|                           | <i>Necator americanus</i>            | XP_013295973 | -----F----YY S SDQE-----                  |
|                           | <i>Haemonchus contortus</i>          | CDJ82163     | -----F----YY S SDQE-----                  |
|                           | <i>Oesophagostomum dentatum</i>      | KHJ92341     | -----F----YY S SDQE-----                  |
|                           | <i>Toxocara canis</i>                | KHN86651     | --I-L-F----Y D -EQD-P-----                |
|                           | <i>Nippostrongylus brasiliensis</i>  | VDL74284     | -----F----YY S SDQE-----                  |
|                           | <i>Loa loa</i>                       | XP_003140552 | -----L-----FY D -DQD-P-----               |
|                           | <i>Enterobius vermicularis</i>       | VDD93079     | --I-L-F----Y D -DQN-P-----                |
|                           | <i>Teladorsagia circumcincta</i>     | PI063993     | -----F----YY S SDQE-----                  |
|                           | <i>Strongylus vulgaris</i>           | VDM71588     | -----F----YY S SDQE-----                  |
|                           | <i>Haemonchus placei</i>             | VDO22610     | -----F----YY S SDQE-----                  |
|                           | <i>Dictyocaulus viviparus</i>        | KJH46797     | --I----F----YY S SDQE-----                |
|                           | <i>Brugia malayi</i>                 | XP_001900704 | ----L-F----FY D -DQD-P-----               |
|                           | <i>Brugia pahangi</i>                | VDN89696     | ----L-F----FY D -DQD-P-----               |
|                           | <i>Litomosoides sigmodontis</i>      | VDK80595     | ----L-F----FY D -DQD-P-----               |
|                           | <i>Angiostrongylus costaricensis</i> | VDM58212     | --I----F----YY S SDQE-----                |
|                           | <i>Onchocerca flexuosa</i>           | VDP12968     | ----L-F----FY D -DQD-P-----               |
|                           | <i>Dracunculus medinensis</i>        | VDN54878     | --I-L-F----Y D -ELD-P-----                |
|                           | <i>Acanthocheilonema viteae</i>      | VBB30047     | ----L-F----FY D -DQD-P-----               |
|                           | <i>Wuchereria bancrofti</i>          | EJW84954     | ----L-F----FY D -DQD-P-----               |
|                           | <i>Ancylostoma duodenale</i>         | KIH59324     | -----F----YY S SDQE-----                  |
|                           | <i>Ancylostoma caninum</i>           | RCN31189     | -----F----YY S SDQE-----                  |
|                           | <i>Thelazia callipaeda</i>           | VDN02201     | ----L-F----FY N -DQD-P-----               |
|                           | <i>Anisakis simplex</i>              | VDK58077     | --I-L-F----Y D -DQD-P-----                |
|                           | <i>Gongylonema pulchrum</i>          | VDN21708     | ----L-F----FY D -EQD-P-----               |
|                           | <i>Brugia timori</i>                 | VDO13135     | ----L-F----FY D -DQD-P-----               |
|                           | <i>Trichuris suis</i>                | KFD49469     | -DI-L-----Y Q RGQQ-P---K-----             |
|                           | <i>Cylicostephanus goldi</i>         | VDK59804     | --I----F----YY S SDQE-----                |
|                           | <i>Trichuris trichiura</i>           | CDW56806     | -DI-L-----Y Q RGQQ-P---K-----             |
|                           | <i>Soboliphyme baturini</i>          | VDP09343     | --I-L-F----Y Q HDKE-P---K-----            |
|                           | <i>Trichinella pseudospiralis</i>    | KRX94481     | --I-L-F----Y Q RDKV-P---K-----            |
|                           | <i>Trichinella patagoniensis</i>     | KRY21320     | --I-L-F----Y Q RDKV-P---K-----            |
|                           | <i>Trichinella nelsoni</i>           | KRX27294     | --I-L-F----Y Q RDKV-P---K-----            |
|                           | <i>Trichinella sp. T6</i>            | KRX76053     | --I-L-F----Y Q RDKV-P---K-----            |
|                           | <i>Trichinella sp. T8</i>            | KRZ86089     | --I-L-F----Y Q RDKV-P---K-----            |
|                           | <i>Trichinella sp. T9</i>            | KRX58564     | --I-L-F----Y Q RDKV-P---K-----            |
|                           | <i>Trichinella spiralis</i>          | KRY35454     | --I-L-F----Y Q RDKV-P---K-----            |
|                           | <i>Trichinella murrelli</i>          | KRX38536     | --I-L-F----Y Q RDKV-P---K-----            |
|                           | <i>Trichinella britovi</i>           | KRY55180     | --I-L-F----Y Q RDKV-P---K-----            |
|                           | <i>Trichinella nativa</i>            | KRZ58235     | --I-L-F----Y Q RDKV-P---K-----            |
|                           | <i>Trichinella zimbabwensis</i>      | KRZ16106     | --I-L-F----Y Q RDKV-P---K-----            |
|                           | <i>Trichinella papuae</i>            | KRZ69043     | --I-L-F----Y Q RDKV-P---K-----            |
| Outgroups<br>(0/>100)     | <i>Homo sapiens</i>                  | AAD54514     | -QI-L-F----Y S SE---P---K-----            |
|                           | <i>Mus musculus</i>                  | BAC29077     | -QI-L-F----Y S SE---P---K-----            |

**Supplementary Figure 5.** Partial sequence alignments of a Cyclin dependent kinase 12 protein with a CSI consisting of a 1 aa deletion (shown in black box) that is specific for the *Caenorhabditis* genus and not present in any other nematode species.

|                           |                                      | 448          | GG                 | 487                  |
|---------------------------|--------------------------------------|--------------|--------------------|----------------------|
| Caenorhabditis<br>(6/6)   | <i>Caenorhabditis elegans</i>        | NP_001040875 | SPFIDEKTRKKFMVSGGS | DLKEELRKHIEEKFI PDFL |
|                           | <i>Caenorhabditis briggsae</i>       | XP_002641795 | -----              | -----D-----          |
|                           | <i>Caenorhabditis nigoni</i>         | PIC39092     | -----              | -----D-----          |
|                           | <i>Caenorhabditis brenneri</i>       | EGT33558     | -----              | -----Y-----          |
|                           | <i>Caenorhabditis remanei</i>        | POM40570     | -----              | -----D-----          |
|                           | <i>Caenorhabditis latens</i>         | OZG18173     | -----              | -----D-----          |
| Other Nematodes<br>(0/42) | <i>Oesophagostomum dentatum</i>      | KHJ77459     | ----DN--N---IN--E  | LV---IS-Y-D-QY----   |
|                           | <i>Brugia timori</i>                 | VD035878     | ----N-----INA-E    | PVIS---Y---QY--E--   |
|                           | <i>Ancylostoma caninum</i>           | RCN37277     | ----DN--N---IN--E  | LV---IS-Y-DDQY----   |
|                           | <i>Necator americanus</i>            | XP_013291223 | ----DN--N---IN--E  | TV---IS-Y-DDQY----   |
|                           | <i>Strongylus vulgaris</i>           | VDM75523     | ----DN--N---IN--E  | LV---IS-Y-D-QY----   |
|                           | <i>Brugia malayi</i>                 | XP_001899466 | ----N-----INA-E    | PVIS---Y---QY--E--   |
|                           | <i>Wuchereria bancrofti</i>          | EJW86413     | ----N-----INA-E    | PVIS---Y---QY--E--   |
|                           | <i>Loa loa</i>                       | XP_020306009 | ----N-----INA-E    | PVIS---Y---QY--E--   |
|                           | <i>Brugia pahangi</i>                | VDN83279     | ----N-----INA-E    | PVIS---Y---QY--E--   |
|                           | <i>Onchocerca ochengi</i>            | VDK61168     | ----N-----INA-E    | SVIS---Y--QQY--E--   |
|                           | <i>Ancylostoma ceylanicum</i>        | EYC32960     | ----DN--N---IN--E  | LV---IS-Y-DDQY----   |
|                           | <i>Heligmosomoides polygyrus</i>     | VDP04674     | ----N--N---INS-E   | VV-D-IS-YVD-QY----   |
|                           | <i>Nippostrongylus brasiliensis</i>  | VDL74672     | ----N--N---INS-E   | VV-D-IS-YVD-QY----   |
|                           | <i>Litomosoides sigmodontis</i>      | VDK72923     | ----N-----INA-E    | PVIS--K-Y---QY--E--  |
|                           | <i>Acanthocheilonema viteae</i>      | VBB31712     | ----N-----INA-E    | PVIC---Y---QY--E--   |
|                           | <i>Teladorsagia circumcincta</i>     | PI077325     | ----N--N---INS-E   | IV-D-IS-Y-DDQY----   |
|                           | <i>Onchocerca flexuosa</i>           | OZC09224     | ----N-----INA-E    | PVIS---Y--QQY--E--   |
|                           | <i>Haemonchus placei</i>             | VDO25093     | ----DN--N---INS-E  | LV-D-IS-Y-D-QY----   |
|                           | <i>Haemonchus contortus</i>          | CDJ85549     | ----DN--N---INS-E  | LV-D-IS-Y-D-QY----   |
|                           | <i>Dracunculus medinensis</i>        | VDN57909     | ----N-----NASE     | S-PA--A-Y-D--YV----  |
|                           | <i>Thelazia callipaeda</i>           | VDN04664     | ----N-----INS-Q    | PVVN--K-Y-S-E---A--  |
|                           | <i>Enterobius vermicularis</i>       | VDD87376     | ----N-----INA-E    | SVIS--K-YMD-QY--E--  |
|                           | <i>Anisakis simplex</i>              | VDK47223     | ----N-----INSSE    | SVFN--S-Y-D-QYL----  |
|                           | <i>Cylicostephanus goldi</i>         | VDK62164     | ----DN--S--KIN--D  | FV-G-IS-Y-D-QY----   |
|                           | <i>Angiostrongylus costaricensis</i> | VDM52935     | ----N--N---INS-E   | IS-G-IS-Y-DDQY----   |
|                           | <i>Dictyocaulus viviparus</i>        | KJH42177     | ----T--N---INS-E   | LV-G-IS-YVDDQY----   |
|                           | <i>Strongyloides ratti</i>           | XP_024498558 | ----N-----NSNE     | HIIDD-K-Y-D-NYL-T--  |
|                           | <i>Toxocara canis</i>                | KHN86630     | ----N-----INS-E    | AVLV--S-Y-DQQYL-E--  |
|                           | <i>Trichuris suis</i>                | KFD57671     | ----N--AN--IY---   | -YANC-CQYM-Q-W----   |
|                           | <i>Trichinella sp. T9</i>            | KRX61898     | ----N-R-A---IYS-N  | -YVDC-KHYMD-EW----   |
|                           | <i>Trichinella nativa</i>            | KRZ51817     | ----N-R-A---IYS-N  | -YVDC-KHYMD-EW----   |
|                           | <i>Trichinella sp. T6</i>            | KRX77867     | ----N-R-A---IYS-N  | -YVDC-KHYMD-EW----   |
|                           | <i>Trichinella spiralis</i>          | KRY33248     | ----N-R-A---IYS-N  | -YVDC-KHYMD-EW----   |
|                           | <i>Trichinella zimbabwensis</i>      | KRZ14091     | ----N-R-A---IYS-N  | -YVDC-KHYMD-EW----   |
|                           | <i>Trichinella papuae</i>            | KRZ78546     | ----N-R-A---IYS-N  | -YVDC-KHYMD-EW----   |
|                           | <i>Trichinella britovi</i>           | KRY45589     | ----N-R-A---IYS-N  | -YVDC-KHYMD-EW----   |
|                           | <i>Trichinella patagoniensis</i>     | KRY15637     | ----N-R-A---IYS-N  | -YVDC-KHYMD-EW----   |
|                           | <i>Trichinella sp. T8</i>            | KRZ85865     | ----N-R-A---IYS-N  | -YVDC-KHYMD-EW----   |
|                           | <i>Trichinella murrelli</i>          | KRX35808     | ----N-R-A---IYS-N  | -YVDC-KHYMD-EW----   |
|                           | <i>Trichinella nelsoni</i>           | KRX21447     | ----N-R-A---IYS-N  | -YVDC-KHYMD-EW----   |
|                           | <i>Trichinella pseudospiralis</i>    | KRY73116     | ----N-R-A---IYS-N  | -YVDC-KHYMD-EW--E-   |
|                           | <i>Trichuris trichiura</i>           | CDW51999     | ----N--AN--IY---   | -YANC-CQYM-Q-W----   |
| Outgroups<br>(0/>100)     | <i>Homo sapiens</i>                  | BAG56746     | ----DN--R--LIYA-N  | -YQGPGLLDY-DKEI---   |
|                           | <i>Mus musculus</i>                  | EDL34613     | ----DN--R--LIYA-N  | -YQGPGLLDY-DKEI---   |

**Supplementary Figure 6.** Partial sequence alignments of an CRAL-TRIO domain-containing Sec14 protein with a CSI consisting of a 2 aa insertion (shown in black box) that is specific for the *Caenorhabditis* genus and not present in any other nematode species.



|                                 |                                 |                | 80              | 109                     |
|---------------------------------|---------------------------------|----------------|-----------------|-------------------------|
| Caenorhabditis<br>(6/6)         | <i>Caenorhabditis elegans</i>   | NP_001254942   | HKNIIQFYGICKAT  | <b>G</b> NDFIVTEYAEKGSL |
|                                 | <i>Caenorhabditis remanei</i>   | XP_003113095   | -----           | - --Y-----              |
|                                 | <i>Caenorhabditis latens</i>    | OZG12911       | -----           | - --Y-----              |
|                                 | <i>Caenorhabditis brenneri</i>  | EGT52079       | -----           | -----R---               |
|                                 | <i>Caenorhabditis briggsae</i>  | CAP34484       | -----           | - --Y-----R---          |
|                                 | <i>Caenorhabditis nigoni</i>    | PIC38130       | -----           | - --Y-----R---          |
| Other Nematodes<br>(0/17)       | <i>Diploscapter pachys</i>      | PAV57043       | -----H---TG     | T--Y-I--F-PN---         |
|                                 | <i>Ancylostoma duodenale</i>    | KIH62964       | -R---H-----SM   | S-----D---N---          |
|                                 | <i>Ancylostoma caninum</i>      | RCN31590       | -R---H-----SM   | S-----D---N---          |
|                                 | <i>Oesophagostomum dentatum</i> | KHJ88987       | -R---H---V--TM  | S-----D---N---          |
|                                 | <i>Ancylostoma ceylanicum</i>   | EPB70831       | -R---H-----SL   | S-----D---N---          |
|                                 | <i>Anisakis simplex</i>         | VDK48365       | -R-----VS-TD    | P-----F--G---           |
|                                 | <i>Enterobius vermicularis</i>  | VDD89857       | -R-----F-VSHTN  | P-----F--N---           |
|                                 | <i>Toxocara canis</i>           | KHN72927       | -R-----F-VSQTN  | P-----F-DG---           |
|                                 | <i>Strongyloides ratti</i>      | XP_024505381   | -R---K---VSL-K  | P-YY----F-AN---         |
|                                 | <i>Onchocerca ochengi</i>       | VDK65711       | ----LRYF-AEVHG  | ---WLI--FHDN---         |
|                                 | <i>Onchocerca flexuosa</i>      | OZC05979       | ----LRYF-SEVHG  | ---WLI--FHDN---         |
|                                 | <i>Gongylonema pulchrum</i>     | VDN19314       | -E-V--LF-VVTES  | EPVM-----M-N---         |
|                                 | <i>Brugia pahangi</i>           | VDN94600       | -P---K---VATLK  | DPIM--M-F-SG---         |
|                                 | <i>Loa loa</i>                  | XP_003139070   | -P---K---VATLK  | DPIM--M-F-SG---         |
| <i>Acanthocheilonema viteae</i> | VBB30169                        | -P---K---VATLK | DPIM--M-F-SG--- |                         |
| <i>Brugia timori</i>            | VDO38867                        | ----LRYL-AEVHG | ---WLI--FHDN--- |                         |
| <i>Brugia malayi</i>            | CDQ03802                        | ----LRYL-AEVHG | ---WLI--FHDN--- |                         |
| Outgroups<br>(0/>100)           | <i>Homo sapiens</i>             | NP_057737      | -R-----VILEP    | PNYG--- --SL-           |
|                                 | <i>Mus musculus</i>             | BAC32371       | -R-----VILEP    | PNYG--- --SL-           |

**Supplementary Figure 7.** Partial sequence alignments of a Mammalian ZAK kinase homolog protein with a CSI consisting of a 1 aa insertion (shown in black box) that is specific for the *Caenorhabditis* genus and not present in any other nematode species.

|                                 |                                     |                            |               |                 |                  |
|---------------------------------|-------------------------------------|----------------------------|---------------|-----------------|------------------|
|                                 | <i>Caenorhabditis elegans</i>       | NP_001022706               | DHRGTTNSFQMQS | <b>LQ</b>       | KTPLSVLYSTEGSVLE |
| Caenorhabditis<br>(6/6)         | <i>Caenorhabditis nigoni</i>        | PIC13845                   | -----         | --              | -----I-----      |
|                                 | <i>Caenorhabditis briggsae</i>      | XP_002642442               | -----         | --              | -----I-----      |
|                                 | <i>Caenorhabditis brenneri</i>      | EGT56754                   | -----A        | --              | -----            |
|                                 | <i>Caenorhabditis remanei</i>       | POM39899                   | -----         | --              | -----V-----      |
|                                 | <i>Caenorhabditis latens</i>        | OZF89246                   | -----         | --              | -----V-----      |
|                                 |                                     | <i>Diploscapter pachys</i> | PAV86338      | -----L--        | --               |
| Other Nematodes<br>(0/40)       | <i>Nippostrongylus brasiliensis</i> | VDL76464                   | -----A--L--   | --              | R---AL---S-----  |
|                                 | <i>Dictyocaulus viviparus</i>       | KJH43544                   | -----A--L--   | --              | ---AQ---S-----   |
|                                 | <i>Ancylostoma caninum</i>          | RCN25685                   | -----A--L--   | --              | ---AQ---S-----   |
|                                 | <i>Haemonchus placei</i>            | VDO28866                   | -----A--L--   | --              | ---AQ---S-----   |
|                                 | <i>Ancylostoma duodenale</i>        | KIH62265                   | -----A--L--   | --              | ---AQ---S-----   |
|                                 | <i>Ancylostoma ceylanicum</i>       | EPB72032                   | -----A--L--   | --              | ---AQ---S-----   |
|                                 | <i>Haemonchus contortus</i>         | CDJ82671                   | -----A--L--   | --              | ---AQ---S-----   |
|                                 | <i>Anisakis simplex</i>             | VDK54203                   | -----A--L--   | --              | ---AQ---S-----   |
|                                 | <i>Necator americanus</i>           | XP_013299661               | -----A--L--   | --              | ---AQ---S-----   |
|                                 | <i>Toxocara canis</i>               | KHN78341                   | -----A--L--   | --              | ---AQ---S-----   |
|                                 | <i>Brugia malayi</i>                | CRZ26330                   | -----A--V--   | --              | R---AQ---S-----  |
|                                 | <i>Heligmosomoides polygyrus</i>    | VDP09895                   | -----A--L--   | --              | ---AQ---S-----   |
|                                 | <i>Oesophagostomum dentatum</i>     | KHJ90379                   | -----T--L--   | --              | R---AQ---S-----  |
|                                 | <i>Brugia pahangi</i>               | VDN89372                   | -----A--V--   | --              | R---AQ---S-----  |
|                                 | <i>Loa loa</i>                      | XP_020303296               | -----A--V--   | --              | R---AQ---S-----  |
|                                 | <i>Wuchereria bancrofti</i>         | EJW83303                   | -----A--V--   | --              | R---AQ---S-----  |
|                                 | <i>Litomosoides sigmodontis</i>     | VDK68074                   | -----A--V--   | --              | R---AQ---S-----  |
|                                 | <i>Thelazia callipaeda</i>          | VDN06480                   | -----A--V--   | --              | R---AQ---S-----  |
|                                 | <i>Onchocerca ochengi</i>           | VDK64108                   | -----A--V--   | --              | R---AQ---S-----  |
|                                 | <i>Onchocerca flexuosa</i>          | OZC09660                   | -----A--V--   | --              | R---AQ---S-----  |
|                                 | <i>Strongyloides ratti</i>          | XP_024507051               | -----A--L--   | --              | ---AQ---S-----   |
|                                 | <i>Brugia timori</i>                | VDO21918                   | -----A--V--   | --              | R---AQ---S-----  |
|                                 | <i>Acanthocheilonema viteae</i>     | VBB26691                   | -----A--V--   | --              | R---AQ---S-----  |
|                                 | <i>Pristionchus pacificus</i>       | PDM84936                   | -----K-A      | --              | R---AQ---S-----  |
|                                 | <i>Trichinella spiralis</i>         | XP_003378646               | -----V--      | --              | --A-AQ---S-----  |
|                                 | <i>Trichinella nativa</i>           | OUC49818                   | -----V--      | --              | --A-AQ---S-----  |
|                                 | <i>Trichinella papuae</i>           | KRZ78135                   | -----V--      | --              | --A-AQ---S-----  |
|                                 | <i>Trichinella murrelli</i>         | KRX50328                   | -----V--      | --              | --A-AQ---S-----  |
|                                 | <i>Trichinella britovi</i>          | KRY57231                   | -----V--      | --              | --A-AQ---S-----  |
|                                 | <i>Trichinella sp. T8</i>           | KRZ92979                   | -----V--      | --              | --A-AQ---S-----  |
|                                 | <i>Trichinella pseudospiralis</i>   | KRZ31736                   | -----V--      | --              | --A-AQ---S-----  |
|                                 | <i>Trichinella nelsoni</i>          | KRX28020                   | -----V--      | --              | --A-AQ---S-----  |
|                                 | <i>Trichuris trichiura</i>          | CDW57862                   | -----V--      | --              | --A-AQ---S-----  |
|                                 | <i>Trichinella patagoniensis</i>    | KRY19114                   | -----V--      | --              | --A-AQ---S-----  |
|                                 | <i>Trichinella sp. T6</i>           | KRX82861                   | -----V--      | --              | --A-AQ---S-----  |
|                                 | <i>Trichinella sp. T9</i>           | KRX64000                   | -----V--      | --              | --A-AQ---S-----  |
| <i>Trichinella zimbabwensis</i> | KRZ13685                            | -----V--                   | --            | --A-AQ---S----- |                  |
| <i>Trichuris suis</i>           | KFD50868                            | -----V--                   | --            | --A-AQ---S----- |                  |
| Outgroups<br>(0/>100)           | <i>Homo sapiens</i>                 | 4HTX_A                     | ----N----     | VA-             | -SV-AA ---S---M  |
|                                 | <i>Mus musculus</i>                 | AAH06845                   | ----N----     | VA-             | -SV-AA ---S---M  |

**Supplementary Figure 8.** Partial sequence alignments of a probable 3',5'-cyclic phosphodiesterase pde-2 protein with a CSI consisting of a 2 aa insertion (shown in black box) that is specific for the *Caenorhabditis* genus and not present in any other nematode species.

|                                      |                                | 7                          | 35              |
|--------------------------------------|--------------------------------|----------------------------|-----------------|
| Caenorhabditis<br>(7/7)              | <i>Caenorhabditis elegans</i>  | NP_001256335               | EFAAFKAITFLNPDA |
|                                      | <i>Caenorhabditis remanei</i>  | OZF78699                   | -----           |
|                                      | <i>Caenorhabditis latens</i>   | OZG09782                   | -----           |
|                                      | <i>Caenorhabditis nigoni</i>   | PIC26490                   | -----           |
|                                      | <i>Caenorhabditis briggsae</i> | XP_002636614               | -----           |
|                                      | <i>Caenorhabditis brenneri</i> | EGT48686                   | -----           |
|                                      | Other Nematodes<br>(0/16)      | <i>Diploscapter pachys</i> | PAV80213        |
| <i>Necator americanus</i>            |                                | XP_013293410               | -----F-----     |
| <i>Ancylostoma ceylanicum</i>        |                                | EPB78040                   | -----T-F-----   |
| <i>Teladorsagia circumcincta</i>     |                                | PI066922                   | -----T-F-----   |
| <i>Ancylostoma caninum</i>           |                                | RCN37032                   | -----T-F-----   |
| <i>Haemonchus placei</i>             |                                | VD026611                   | -----T-F-----   |
| <i>Dictyocaulus viviparus</i>        |                                | KJH43863                   | ---T---AL-F---  |
| <i>Angiostrongylus costaricensis</i> |                                | VDM58595                   | ---T---AL-F---  |
| <i>Pristionchus pacificus</i>        |                                | PDM77897                   | --S-----F-----  |
| <i>Heligmosomoides polygyrus</i>     |                                | VD079280                   | -----T-F-----   |
| <i>Haemonchus contortus</i>          |                                | CDJ92296                   | ---T---AL-F---  |
| <i>Nippostrongylus brasiliensis</i>  |                                | VDL82945                   | -----T-F-----   |
| <i>Anisakis simplex</i>              |                                | VDK50975                   | --S-----F-----  |
| <i>Strongylus vulgaris</i>           |                                | VDM85120                   | -----T-F-----   |
| <i>Toxocara canis</i>                |                                | KHN81931                   | -----F-----     |
| <i>Ancylostoma duodenale</i>         |                                | KIH69436                   | ---T---AL-F---  |

DISLESKHAINEER  
 -V---A--E--T--  
 -V---A--E--T--  
 -V---A--E--L--  
 -V---A--E--L--  
 -V---A--E--L--  
 -V--DA-A-----

**Supplementary Figure 9.** Partial sequence alignments of a Nuclear Hormone Receptor protein with a CSI consisting of a 1 aa deletion (shown in black box) that is specific for the *Caenorhabditis* genus and not present in any other nematode species. Homologous sequences for this protein were not observed for many non-nematode organisms in the BLASTP search.

|                           |                                   | 1353         | 1393                                        |
|---------------------------|-----------------------------------|--------------|---------------------------------------------|
| Caenorhabditis<br>(6/6)   | <i>Caenorhabditis elegans</i>     | NP_001256383 | RREADEVVGMWYKAKL VM SGDDSSALAPSAIPHRLLKHEAF |
|                           | <i>Caenorhabditis nigoni</i>      | PIC26477     | -----M--H----- -A-----A-----                |
|                           | <i>Caenorhabditis briggsae</i>    | CAP39687     | -----M--H----- -A-----A-----                |
|                           | <i>Caenorhabditis remanei</i>     | XP_003114094 | -----M--H----- -A-----T--T-----             |
|                           | <i>Caenorhabditis latens</i>      | OZG15081     | -----M--H----- -A-----T--T-----             |
|                           | <i>Caenorhabditis brenneri</i>    | EGT60238     | -----M--H----- -A-----AT--A-----            |
| Other Nematodes<br>(0/27) | <i>Ancylostoma ceylanicum</i>     | EYB93290     | K-D-E-MIS-IH-K-- AN--HRDLTS-ANK-----        |
|                           | <i>Ancylostoma duodenale</i>      | KIH45166     | K-D-E-MIS-I--K-- AN--HRDLTS-ANK-----        |
|                           | <i>Brugia malayi</i>              | CDP98888     | --NIQ-LSQ-IA--R-I AN--YRD TAS-TMK----K--    |
|                           | <i>Dictyocaulus viviparus</i>     | KJH48207     | K-D-E-MIA-IHD-K-- AN--HKDL-S-ANK-----       |
|                           | <i>Diploscapter pachys</i>        | PAV55545     | K-DG-MI--IA--K-T AC--HRDLTS-ANK--R----      |
|                           | <i>Haemonchus contortus</i>       | CDJ92175     | K-D-E-MIT-IH--K-- AN--HRDLTS-ANK-----       |
|                           | <i>Loa loa</i>                    | XP_020307521 | --NIQ-LSQ-IA--E-I AN--YRDAAS-TMK----K--     |
|                           | <i>Necator americanus</i>         | XP_013296416 | K-D-E-MIS-IH--K-- AN--HRDLTS-ANK-----       |
|                           | <i>Oesophagostomum dentatum</i>   | KHJ79216     | --D-E-MIA-IHD-K-- AN--HRDLTS-ANK-----       |
|                           | <i>Onchocerca flexuosa</i>        | OZC12060     | --NIQ-LTQ-IA--KRI AN-G-YRDAAS-TMK----K--    |
|                           | <i>Strongyloides ratti</i>        | CEF62413     | --D-F-LNC--V--KGI L-EEDLSD--LRRH-QR--K-     |
|                           | <i>Wuchereria bancrofti</i>       | EJW88400     | --NIQ-LSQ-IA--R-I AN--YRD TAS-TMK----K--    |
|                           | <i>Toxocara canis</i>             | KHN72701     | --NIQ-LSQ-IA--K-I AN--AHKDAASLANK----S--    |
|                           | <i>Trichinella britovi</i>        | KRY52189     | --VE-LMQ-IG--MRI VSS--YHSGNLQK-IK-----      |
|                           | <i>Trichinella murrelli</i>       | KRX45023     | --VE-LMQ-IG--MRI VSS--YHSGNLQK-IK-----      |
|                           | <i>Trichinella nativa</i>         | KRZ55341     | --VE-LMQ-IG--MRI VSS--YHSGNLQK-IK-----      |
|                           | <i>Trichinella nelsoni</i>        | KRX16494     | --VE-LMQ-IG--MRI VSS--YHSGNLQK-IK-----      |
|                           | <i>Trichinella papuae</i>         | KRZ76031     | --VE-LMQ-IG--MRI VSS--YHSGNLQK-IK-----      |
|                           | <i>Trichinella patagoniensis</i>  | KRY15104     | --VE-LMQ-IG--MRI VSS--YHSGNLQK-IK-----      |
|                           | <i>Trichinella pseudospiralis</i> | KRX93022     | --VE-LMQ-IG--MRI VSS--YHSGNLQK-IK-----      |
|                           | <i>Trichinella sp. T9</i>         | KRX58782     | --VE-LMQ-IG--MRI VSS--YHSGNLQK-IK-----      |
|                           | <i>Trichinella sp. T8</i>         | KRZ97225     | --VE-LMQ-IG--MRI VSS--YHSGNLQK-IK-----      |
|                           | <i>Trichinella sp. T6</i>         | KRX80779     | --VE-LMQ-IG--MRI VSS--YHSGNLQK-IK-----      |
|                           | <i>Trichinella spiralis</i>       | KRY35759     | --VE-LMQ-IG--MRI VSS--YHSGNLQK-IK-----      |
|                           | <i>Trichinella zimbabwensis</i>   | KRZ10195     | --VE-LMQ-IG--MRI VSS--YHSGNLQK-IK-----      |
|                           | <i>Trichuris suis</i>             | KFD52473     | K-N--LLV-VG--MRI AV--YHSGNLQK-IK-----       |
|                           | <i>Trichuris trichiura</i>        | CDW52048     | K-N--LLV-VG--MRI AV--YHSGNLQK-IK-----       |
| Outgroups<br>(0/>100)     | <i>Homo sapiens</i>               | EAW87810     | F-DS--LKS-VN--M-T AT-EAYKD--NLQKVVQ--Q--    |
|                           | <i>Mus musculus</i>               | XP_006497875 | F-DS--LKS-VN--M-T AT-EAYKD--NLQKVVQ--Q--    |

**Supplementary Figure 10.** Partial sequence alignments of a SMAII-like (spore membrane assembly protein 2-like) apotein with a CSI consisting of a 2 aa insertion (shown in black box) that is specific for the *Caenorhabditis* genus and not present in any other nematode species.

|                                       |                                      | 65           | 103                                             |
|---------------------------------------|--------------------------------------|--------------|-------------------------------------------------|
| Caenorhabditis<br>homologs 1<br>(0/6) | <i>Caenorhabditis elegans</i>        | NP_001254962 | WYFSKHYKGVPTLEHDEG <b>K</b> KHVIESAVIPEYLDDIYPE |
|                                       | <i>Caenorhabditis brenneri</i>       | EGT52105     | -----A----- -LF--                               |
|                                       | <i>Caenorhabditis remanei</i>        | POM37290     | -----A----- -H-----LF--                         |
|                                       | <i>Caenorhabditis latens</i>         | OZG10203     | -----A----- -H-----LF--                         |
|                                       | <i>Caenorhabditis briggsae</i>       | XP_002642151 | -----A-L----- -H-----LF--                       |
|                                       | <i>Caenorhabditis nigoni</i>         | PIC37794     | -----A-L----- -H-----LF--                       |
| Caenorhabditis<br>homologs 2<br>(0/6) | <i>Caenorhabditis elegans</i>        | NP_498728    | --WT--Q-KA-AV--N -V----GF-----AF--              |
|                                       | <i>Caenorhabditis brenneri</i>       | EGT56590     | -----Q-KA-AV--- -V----GF-----AF--               |
|                                       | <i>Caenorhabditis remanei</i>        | OZF78070     | -----Q-KA-AI--N -I----GY-----AF--               |
|                                       | <i>Caenorhabditis latens</i>         | OZG17648     | -----Q-KA-AI--N -I----GY-----AF--               |
|                                       | <i>Caenorhabditis nigoni</i>         | PIC40033     | -FY---Q-KA-AI--- -I----GF-----AF--              |
|                                       | <i>Caenorhabditis briggsae</i>       | XP_002642703 | -FY---Q-KA-AI--- -I----GF-----AF--              |
| Other Nematodes<br>(0/22)             | <i>Diploscapter pachys</i>           | 1240346389   | --K--Q-K--F--- -V----LM-----AF-N                |
|                                       | <i>Pristionchus pacificus</i>        | 1253266495   | --N--PQ-K--F-K- -QI---GI-----G----              |
|                                       | <i>Anisakis simplex</i>              | 1528886049   | --K--PQ-NL----- -II---T--VQ---ELF--             |
|                                       | <i>Toxocara canis</i>                | 1535084310   | --K--PE-K--A--YN -NI-V---I--Q----LL--           |
|                                       | <i>Loa loa</i>                       | 312091393    | -FL---PE-T--V----- -L-SD-R--I-----AF--          |
|                                       | <i>Strongyloides ratti</i>           | 1376147712   | --L--SPT---LF--- -YIT--N--L-----FSA             |
|                                       | <i>Brugia timori</i>                 | 1535290525   | -FL---PE-T--L----- -L-PD-R--I-----AF--          |
|                                       | <i>Brugia malayi</i>                 | 170591346    | -FL---PE-T--L----- -L-PD-R--I-----AF--          |
|                                       | <i>Wuchereria bancrofti</i>          | 1528677019   | -FL---PE-T--L----- -L-PD-R--I-----AF--          |
|                                       | <i>Onchocerca ochengi</i>            | 1528803377   | -FY--NPE-V--V--N -L-NG-QM-I-----V---            |
|                                       | <i>Ancylostoma ceylanicum</i>        | 597840312    | FL---PE-K--V--K -QNI-D--L-S---W-Q-H             |
|                                       | <i>Litomosoides sigmodontis</i>      | 1528641557   | -FLK-SPL-R--A--MN -VTIY--S--A---EVF--           |
|                                       | <i>Acanthocheilonema viteae</i>      | 1511235889   | -FLN-SPL-R--A--MN -VTIY--S--A---E-F--           |
|                                       | <i>Onchocerca flexuosa</i>           | 1233063254   | -FLN-SPL-R--AF-MN -IIIIY--S--A---E-F--          |
|                                       | <i>Teladorsagia circumcincta</i>     | 1276828720   | --LA-SPL-S--A--IN -VIW--K-LA---EVF-T            |
|                                       | <i>Haemonchus placei</i>             | 1535225151   | --LA-SPL-S--A--IN -VIW--K-LA---EVF-M            |
|                                       | <i>Heligmosomoides polygyrus</i>     | 1530586556   | --LA-SPL-S--A--IN -VIW--K-LA---EVF-S            |
|                                       | <i>Ancylostoma duodenale</i>         | 748384251    | --LA-SPL-S--A--IN -RVIW--K-LA---EVF-S           |
|                                       | <i>Haemonchus contortus</i>          | 560138214    | --LA-SPL-S--A--IN -VIW--K-LA---EVF-M            |
|                                       | <i>Angiostrongylus costaricensis</i> | 1529400037   | --LA-SPL-S--A--IN -NVIF--K-LA---EVF-S           |
|                                       | <i>Ancylostoma caninum</i>           | 1432393302   | --LA-SPL-S--A--IN -RVIW--K-LA---EVF-S           |
|                                       | <i>Necator americanus</i>            | 915240016    | --LA-SPL-S--A--IN -NVIW--K-LA---EMF-S           |
| Outgroups<br>(0/>100)                 | <i>Homo sapiens</i>                  | NP_001177932 | -F-K-NPF-L--V--NSQ- QLIY---ITC---EA--G          |
|                                       | <i>Mus musculus</i>                  | NP_080895    | --YT--PF--I-V--NSQC QL-Y--VIAC-----V--G         |

**Supplementary Figure 11.** Partial sequence alignments of a Glutathione transferase omega-1 protein with a CSI consisting of a 1 aa insertion (shown in black box) that is specific for the *Caenorhabditis* genus and not present in any other nematode species. There are two homologs of this protein in the *Caenorhabditis* species, one of which contains the CSI.

|                           |                                   | 46           | 90                                             |
|---------------------------|-----------------------------------|--------------|------------------------------------------------|
| Caenorhabditis<br>(5/6)   | <i>Caenorhabditis elegans</i>     | NP_001254973 | LCKIMLNETEQLAGLLAAKEIVAYQKSP R IIAIRSMADAFKRSL |
|                           | <i>Caenorhabditis briggsae</i>    | XP_002642446 | -----IPAM-ST--VLP-NT-- -V---A-----             |
|                           | <i>Caenorhabditis nigoni</i>      | PIC13841     | -----IPAM-ST--VLP-NTN- -V---A-----             |
|                           | <i>Caenorhabditis remanei</i>     | POM39937     | -----PS---T--FLP-HSNL ----A-----               |
|                           | <i>Caenorhabditis brenneri</i>    | EGT56767     | -----VD--PAIM-T-AV-PHLTDL K-V--L-----          |
|                           | <i>Caenorhabditis latens</i>      | OZG01391     | --V--DVPDEVNS--S-KLALKYSGSDL E-MKAI-A-AQ----   |
| Other Nematodes<br>(0/31) | <i>Diploscapter pachys</i>        | PAV73536     | ---LTDGAAAVPVM-ST--AA--SGPS -S-VKQL-K--EE---   |
|                           | <i>Oesophagostomum dentatum</i>   | KHJ81246     | -----DADSIPL--ST-VLQPVGRG E-MKC--E--KE---      |
|                           | <i>Ancylostoma caninum</i>        | RCN32955     | -----A-SIPL--ST-VLQPVGRG VD-MKC--E--KE---      |
|                           | <i>Ancylostoma duodenale</i>      | KIH66516     | -----A-SIPL--ST-VLQPVGRG VD-MKC--E--KE---      |
|                           | <i>Ancylostoma ceylanicum</i>     | EPB72600     | -----A-SIPL--ST-VLQPVGRG VD-MK---E--KE---      |
|                           | <i>Strongylus vulgaris</i>        | VDM73537     | ----ADSIPL---T-VLQPV-GRE VD-MKC--E--KE---      |
|                           | <i>Dictyocaulus viviparus</i>     | KJH43501     | ----M--A-SVPF--ST-VAQSIRGRD VD-MKC--E--KE---   |
|                           | <i>Necator americanus</i>         | XP_013303392 | -----ADSIPL--SN-VLQ-VHGRD VD-MK---E--KE---     |
|                           | <i>Haemonchus contortus</i>       | CDJ89185     | -----ADTIPL--ST-T-QSIRGRE -E-MK---E--TE---     |
|                           | <i>Haemonchus placei</i>          | VDO28354     | -----ADTIPL--ST-T-QSIRGRE -E-MK---E--TE---     |
|                           | <i>Toxocara canis</i>             | KHN88339     | -A-----A-EVPLI-SG-IA-K-KGRD VE-M--V-A--QQ---   |
|                           | <i>Anisakis simplex</i>           | VDK27391     | -A---M--A-EVPSI-SG-LALK-KGRD VE-MQ-V-Q--QQ---  |
|                           | <i>Soboliphyme baturini</i>       | VD092414     | -----LPDDVQS--S--IALK-VGRE VD-MKAV--SK----     |
|                           | <i>Wuchereria bancrofti</i>       | EJW84880     | -A-----EREISL--SS-LAAK-SGRD LD-MKDI-S--EN-C-   |
|                           | <i>Brugia pahangi</i>             | VDN91962     | -A-----EREIGL--SS-LAAK-SGRD LD-MKDI-S--EN-C-   |
|                           | <i>Brugia malayi</i>              | CDP99050     | -A-----EREIGL--SS-LAAK-SGRD LD-MKDI-S--EN-C-   |
|                           | <i>Loa loa</i>                    | XP_020301826 | -A-----ETEVS--SS-LATK-SGRD LD-M-DI-T--EN---    |
|                           | <i>Acanthocheilonema viteae</i>   | VBB27213     | -T-----EIEVQS--SS-QAMK-SGRD LD--K-I-A--DN---   |
|                           | <i>Onchocerca flexuosa</i>        | VDP14909     | -A-----ELEVHSI-SS-LAAK-SGRD LD---TI-E-LEN---   |
|                           | <i>Onchocerca ochengi</i>         | VDK79902     | VA-----EVEVRSI-SS-LAAK-SGRD LD---TI-E-LEN---   |
|                           | <i>Litomosoides sigmodontis</i>   | VDK81777     | IA-----ETEVPT--SG-QTIKHSRD LD-MKRI-E--HN---    |
|                           | <i>Strongyloides ratti</i>        | XP_024507529 | ---V--DSPDDVKS--SQ-LALK-SGRD LD-M-AV-N-AK----  |
|                           | <i>Trichinella pseudospiralis</i> | KRZ32121     | -----LPDEVHI-VQG-LGMKHAGRQ LE-MKAV-T-SKE---    |
|                           | <i>Trichinella zimbabwensis</i>   | KRZ06531     | -----LPDEVHI-VQG-LGMKHAGRQ LE-MKAV-T-SKE---    |
|                           | <i>Trichinella spiralis</i>       | XP_003375869 | -----LPDDVHI-VQG-LGMKHAGRQ LE-MKAV-T-SKE---    |
|                           | <i>Trichinella sp. T6</i>         | KRX70901     | -----LPDDVHI-VQG-LGMKHAGRQ LE-MKAV-T-SKE---    |
|                           | <i>Trichinella britovi</i>        | KRY56382     | -----LPDDVHI-VQG-LGMKHAGRQ LE-MKAV-T-SKE---    |
|                           | <i>Trichinella murrelli</i>       | KRX35477     | -----LPDDVHI-VQG-LGMKHAGRQ LE-MKAV-T-SKE---    |
|                           | <i>Trichinella nelsoni</i>        | KRX19233     | -----LPDDVHI-VQG-LGMKHAGRQ LE-MKAV-T-SKE---    |
|                           | <i>Trichuris trichiura</i>        | CDW54525     | -----RP-DVSII-SG-LATK-VGRE VD-MKAV-H-SKE---    |
|                           | <i>Trichuris suis</i>             | KFD62841     | -----RP-DVSII-SG-LATK-VGRE VD-MKAV-H-SKE---    |
| Outgroups<br>(0/>100)     | <i>Homo sapiens</i>               | 5VGZ_X       | -----TP-DVQA-VSG -LALR-AGRQ TE-LKCV-Q-SKN---   |
|                           | <i>Mus musculus</i>               | EDL15644     | -----TP-DVQA-VSG -LALR-AGRQ TE-LKCV-Q-SKN---   |

**Supplementary Figure 12.** Partial sequence alignments of a 26S proteasome regulatory protein subunit with a CSI consisting of a 1 aa insertion (shown in black box) that is specific for the *Caenorhabditis* genus and not present in any other nematode species.

|                                      |                                  | 92                          | 130                                                               |                        |                       |
|--------------------------------------|----------------------------------|-----------------------------|-------------------------------------------------------------------|------------------------|-----------------------|
| Caenorhabditis<br>(6/6)              | <i>Caenorhabditis elegans</i>    | NP_001256283                | VKRAALNELVDHVS <span style="border: 1px solid black;">GA</span> P | KGSLSDAVYPEAIGMFSTNLFR |                       |
|                                      | <i>Caenorhabditis remanei</i>    | XP_003100389                | -----                                                             | A-----H-----           |                       |
|                                      | <i>Caenorhabditis latens</i>     | OZG13626                    | -----                                                             | A-----H-----           |                       |
|                                      | <i>Caenorhabditis brenneri</i>   | EGT55351                    | -----                                                             | A R---E---N-----       |                       |
|                                      | <i>Caenorhabditis nigoni</i>     | PIC26850                    | -----Y--A-                                                        | S--T-----N-----        |                       |
|                                      | <i>Caenorhabditis briggsae</i>   | XP_002636421                | -----Y--A-                                                        | S--T-----N-----        |                       |
|                                      | <i>Diploscapter pachys</i>       | PAV63148                    | I-----I--ITTT                                                     | --AIVE-I---V-K-V-K-I-- |                       |
|                                      | <i>Heligmosomoides polygyrus</i> | VD029824                    | -----I-Y--TC                                                      | RDAIT-NI----N--AL----  |                       |
|                                      | <i>Dictyocaulus viviparus</i>    | KJH45358                    | -----I-Y--TC                                                      | RDAIT-NI----N--AV----  |                       |
|                                      | <i>Enterobius vermicularis</i>   | VDD95190                    | I-----I--ITTV                                                     | --AITE-I---V-N-V-M-I-- |                       |
|                                      | <i>Gongylophora pulchrum</i>     | VDN17983                    | I-----I--ITTV                                                     | --AITESI---V-K-V-K-I-- |                       |
|                                      | <i>Onchocerca ochengi</i>        | VDK71745                    | I-----I--ITTV                                                     | --AITESI---V-K-V-K-I-- |                       |
|                                      | <i>Cylicostephanus goldi</i>     | VDN34744                    | I-----I--ITTT                                                     | --AIVESI---V-K-V-K-I-- |                       |
|                                      | <i>Teladorsagia circumcincta</i> | PI072193                    | -----I-Y--TC                                                      | RDAITEN-----N--AL----  |                       |
|                                      | Other Nematodes<br>(0/39)        | <i>Capitella teleta</i>     | ELU16316                                                          | -----M-EY-TQN          | R-VIT-----S-R--GV---- |
|                                      |                                  | <i>Haemonchus contortus</i> | CDJ84163                                                          | -----I-Y--TC           | RDAITENI----N--AV---- |
| <i>Onchocerca flexuosa</i>           |                                  | VD026608                    | I-----I--ITTV                                                     | --AITESI---V-K-V-K-I-- |                       |
| <i>Brugia timori</i>                 |                                  | VD024925                    | I-----I--ITTV                                                     | --AITELI---V-K-V-K-I-- |                       |
| <i>Brugia pahangi</i>                |                                  | VDN92265                    | I-----I--ITTV                                                     | --AITELI---V-K-V-K-I-- |                       |
| <i>Brugia malayi</i>                 |                                  | CRZ24423                    | I-----I--ITTV                                                     | --AITELI---V-K-V-K-I-- |                       |
| <i>Loa loa</i>                       |                                  | XP_020303422                | I-----I--ITTV                                                     | --AITELI---V-K-V-K-I-- |                       |
| <i>Angiostrongylus costaricensis</i> |                                  | VDM53307                    | ---T---I-Y--TC                                                    | RDVIT-N-----N--AV----  |                       |
| <i>Ancylostoma ceylanicum</i>        |                                  | EPB69273                    | I-----I--ITTT                                                     | --AIVESI---V-K-V-K-I-- |                       |
| <i>Necator americanus</i>            |                                  | XP_013294654                | I-----I--ITTT                                                     | --AIVESI---V-K-V-K-I-- |                       |
| <i>Wuchereria bancrofti</i>          |                                  | VDM09038                    | I-----I--ITTV                                                     | --AITELI---V-K-V-K-I-- |                       |
| <i>Ancylostoma duodenale</i>         |                                  | KIH63659                    | I-----I--ITTT                                                     | --AIVESI---V-K-V-K-I-- |                       |
| <i>Thelazia callipaeda</i>           |                                  | VDN06789                    | I-----I--ITTV                                                     | --AITESI---I-K-A-K-I-- |                       |
| <i>Toxocara canis</i>                |                                  | KHN78251                    | I-----I--ITTV                                                     | --AITEPI---V-K-V-K-I-- |                       |
| <i>Ancylostoma caninum</i>           |                                  | RCN34933                    | -----I-Y--TC                                                      | RDVITEN-----N--AL----  |                       |
| <i>Acanthocheilonema viteae</i>      |                                  | VBB32494                    | I-----I--ITTV                                                     | --AITELI---M-K-V-K-I-- |                       |
| <i>Acanthaster planci</i>            |                                  | XP_022087591                | -----F--THQ                                                       | R-VITEPI---VK---I-M--  |                       |
| <i>Haemonchus placei</i>             |                                  | VD023997                    | -----I-Y--TC                                                      | RDAITENI----N--AI----  |                       |
| <i>Oesophagostomum dentatum</i>      |                                  | KHJ92877                    | I-----I--ITTT                                                     | --AIVESI---V-K-V-K-I-- |                       |
| <i>Trichinella patagoniensis</i>     |                                  | KRY08455                    | --ST---I-Y--AN                                                    | REIFTESI---VVN--AV-T-- |                       |
| <i>Trichinella pseudospiralis</i>    |                                  | KRZ40843                    | --ST---I-Y--AN                                                    | REIFTESI---VVN--AV-T-- |                       |
| <i>Trichinella sp. T6</i>            |                                  | KRX84522                    | --ST---I-Y--AN                                                    | REIFTESI---VVN--AV-T-- |                       |
| <i>Trichinella zimbabwensis</i>      |                                  | KRZ12447                    | --ST---I-Y--AN                                                    | REIFTESI---VVN--AV-T-- |                       |
| <i>Trichinella sp. T9</i>            |                                  | KRX66464                    | --ST---I-Y--AN                                                    | REIFTESI---VVN--AV-T-- |                       |
| <i>Trichinella papuae</i>            |                                  | KRZ78327                    | --ST---I-Y--AN                                                    | REIFTESI---VVN--AV-T-- |                       |
| <i>Trichinella britovi</i>           |                                  | KRY60742                    | --ST---I-Y--AN                                                    | REIFTESI---VVN--AV-T-- |                       |
| <i>Trichinella sp. T8</i>            |                                  | KRZ86685                    | --ST---I-Y--AN                                                    | REIFTESI---VVN--AV-T-- |                       |
| <i>Trichinella nelsoni</i>           |                                  | KRX17598                    | --ST---I-Y--AN                                                    | REIFTESI---VVN--AV-T-- |                       |
| <i>Trichinella spiralis</i>          |                                  | KRY43433                    | --ST---I-Y--AN                                                    | REIFTESI---VVN--AV-T-- |                       |
| <i>Trichinella nativa</i>            |                                  | KRZ61030                    | --ST---I-Y--AN                                                    | REIFTESI---VVN--AV-T-- |                       |
| <i>Trichinella murrelli</i>          |                                  | KRX50117                    | --ST---I-Y--AN                                                    | REIFTESI---VVN--AV-T-- |                       |
| <i>Trichuris trichiura</i>           |                                  | CDW53420                    | --IT-T-MI-FIGN                                                    | --I-TESI---VVK-V-V-I-- |                       |
| <i>Soboliphyme baturini</i>          |                                  | VDP13876                    | ---LN---I-YI-SN                                                   | R-I-TERI---IFSV-AL-T-- |                       |
| Outgroups<br>(0/>100)                | <i>Homo sapiens</i>              | NP_851308                   | ---G---M-EYITHS                                                   | RDVVTE-I----VT---V---- |                       |
|                                      | <i>Mus musculus</i>              | NP_033384                   | ---G---M-EYITHS                                                   | RDVVTE-I----VT---V---- |                       |

**Supplementary Figure 13.** Partial sequence alignments of a Serine/Threonine protein phosphatase 2A Regulatory protein subunit with a CSI consisting of a 1 aa insertion (shown in black box) that is specific for the *Caenorhabditis* genus and not present in any other nematode species.

|                                      |                                      | 176          | 211               |
|--------------------------------------|--------------------------------------|--------------|-------------------|
| Caenorhabditis<br>homolog 1<br>(0/6) | <i>Caenorhabditis elegans</i>        | NP_001293265 | LEALASLLASNKYFFD  |
|                                      | <i>Caenorhabditis nigoni</i>         | PIC50339     | -----N-----       |
|                                      | <i>Caenorhabditis briggsae</i>       | CAR98690     | -----N-----       |
|                                      | <i>Caenorhabditis remanei</i>        | XP_003109234 | -----N-----       |
|                                      | <i>Caenorhabditis angaria</i>        | ACI49217     | ---SAQ-S-----N    |
|                                      | <i>Caenorhabditis brenneri</i>       | EGT46436     | -----N-----       |
| Caenorhabditis<br>homolog 2<br>(0/6) | <i>Caenorhabditis elegans</i>        | NP_496604    | -D-ISTQ-GDKP-L-G  |
|                                      | <i>Caenorhabditis latens</i>         | OZG15802     | -D--STQ-GDK--L-G  |
|                                      | <i>Caenorhabditis remanei</i>        | OZF85650     | -D--STQ-GDK--L-G  |
|                                      | <i>Caenorhabditis briggsae</i>       | XP_002631730 | -D--SVQ-GEK--L-G  |
|                                      | <i>Caenorhabditis nigoni</i>         | PIC47567     | -D--SVQ-GEK--L-G  |
|                                      | <i>Caenorhabditis brenneri</i>       | EGT44430     | -D--SIQ--DKP-L-G  |
| Other Nematodes<br>(0/33)            | <i>Diploscapter pachys</i>           | PAV73992     | -K-VSVI-GDKD--G   |
|                                      | <i>Strongyloides ratti</i>           | XP_024505706 | -K--SV--GDKP--G   |
|                                      | <i>Nippostrongylus brasiliensis</i>  | VDL79647     | -D-INMF-GNK---G   |
|                                      | <i>Loa loa</i>                       | XP_003137781 | -T--SVF-GDKQ--G   |
|                                      | <i>Toxocara canis</i>                | KHN80093     | -L--SVF-ADKPF--G  |
|                                      | <i>Pristionchus pacificus</i>        | PDM69804     | -K-SICIF-GDKP--GG |
|                                      | <i>Thelazia callipaeda</i>           | VDN06273     | -T--SVF-DDK-F--G  |
|                                      | <i>Heligmosomoides polygyrus</i>     | VDO72907     | -D-INMF-GNK---G   |
|                                      | <i>Strongylus vulgaris</i>           | VDM73748     | FD--KTI-GEQ-FL-G  |
|                                      | <i>Ancylostoma caninum</i>           | RCN37793     | -R--S-Q-G-KP-L-G  |
|                                      | <i>Ancylostoma ceylanicum</i>        | EPB70131     | -R--S-Q-G-KP-L-G  |
|                                      | <i>Ancylostoma duodenale</i>         | KIH46080     | -R--S-Q-G-KP-L-G  |
|                                      | <i>Dictyocaulus viviparus</i>        | KJH41673     | -R--S-Q-G-KP-L-G  |
|                                      | <i>Angiostrongylus costaricensis</i> | VDM51872     | -R--S-Q-G-KP-L-G  |
|                                      | <i>Oesophagostomum dentatum</i>      | KHJ95729     | -R--SLQ-G-KP-L-G  |
|                                      | <i>Haemonchus contortus</i>          | CDJ97722     | FDTYRD--GDK-FL-G  |
|                                      | <i>Teladorsagia circumcincta</i>     | PI068216     | -R--S-Q-G-KPFL-G  |
|                                      | <i>Brugia pahangi</i>                | VDN85522     | IA-IDVI-GDK-FL-G  |
|                                      | <i>Wuchereria bancrofti</i>          | VDM20389     | IA-IDVI-GDK-FL-G  |
|                                      | <i>Brugia malayi</i>                 | CTP81381     | IA-IDVI-GDK-FL-G  |
|                                      | <i>Dracunculus medinensis</i>        | VDN55503     | IR-VDLI-GDK-FL-G  |
|                                      | <i>Brugia timori</i>                 | VDO23595     | IA-IDVI-GDK-FL-G  |
|                                      | <i>Necator americanus</i>            | XP_013298689 | -R--S-Q-G-KS-L-G  |
|                                      | <i>Acanthocheilonema viteae</i>      | VBB25728     | IA-IDVI-GDK-FL-G  |
|                                      | <i>Soboliphyme baturini</i>          | VDP46272     | -RSFSVF-GEKA-LMG  |
|                                      | <i>Onchocerca flexuosa</i>           | VDP13294     | IA-IDII-GDK-FL-G  |
|                                      | <i>Onchocerca ochengi</i>            | VDK63043     | IA-IDII-GDK-FL-G  |
|                                      | <i>Litomosoides sigmodontis</i>      | VDK75340     | IAVIDVI-GDK-FL-G  |
|                                      | <i>Trichinella sp. T9</i>            | KRX54821     | VQY-SER-GEQP---G  |
|                                      | <i>Trichinella murrelli</i>          | KRX37203     | VQY-SER-GEQP---G  |
|                                      | <i>Trichinella zimbabwensis</i>      | KRZ10266     | VK-ISVF-GDKT-LSG  |
|                                      | <i>Trichinella pseudospiralis</i>    | KRY82320     | VK-ISVF-GDKT-LSG  |
|                                      | <i>Trichinella spiralis</i>          | XP_003373651 | VK-ISVF-GDKT-LSG  |

**Supplementary Figure 14.** Partial sequence alignments of a Failed axon connections-like protein with a CSI consisting of a 1 aa insertion (shown in black box) that is specific for the *Caenorhabditis* genus and not present in any other nematode species. There are two homologs of this protein in the *Caenorhabditis* species, one of which contains the CSI. The sequence alignment for homolog 1 of the species *Caenorhabditis latens* was not observed in the BLASTP search. Homologous sequences for this protein were not observed for many non-nematode organisms in the BLASTP search.



|                           |   |                                      | 62           |               | 97           |            |
|---------------------------|---|--------------------------------------|--------------|---------------|--------------|------------|
| Caenorhabditis<br>(5/5)   | { | <i>Caenorhabditis briggsae</i>       | XP_002632399 | PDLEWQAWLRGTR | RNVDMYWNLYFD | RFPPSDTEIA |
|                           |   | <i>Caenorhabditis remanei</i>        | XP_003103438 | -----         | -----        | -----      |
|                           |   | <i>Caenorhabditis latens</i>         | OZF87462     | -----         | -----        | -----      |
|                           |   | <i>Caenorhabditis brenneri</i>       | EGT41957     | -A-----       | -----        | -----R--T  |
|                           |   | <i>Caenorhabditis elegans</i>        | NP_001255924 | -----         | -----        | -----R---  |
| Other Nematodes<br>(0/25) | { | <i>Ancylostoma duodenale</i>         | KIH45006     | -GV---S--K--- | -----        | -----D---  |
|                           |   | <i>Ancylostoma ceylanicum</i>        | EYC31492     | -GV---S--K--- | -----        | -----D---  |
|                           |   | <i>Ancylostoma caninum</i>           | RCN50008     | -GV---S--K--- | -----        | -----D---  |
|                           |   | <i>Cylicostephanus goldi</i>         | VDN23744     | -GV---S--K--- | -----        | -----Q-L-  |
|                           |   | <i>Angiostrongylus costaricensis</i> | VDM56116     | -TV---S--K--- | -----        | -----EE--- |
|                           |   | <i>Heligmosomoides polygyrus</i>     | VDP16140     | -SV---S--K--- | -----        | -----EQ--- |
|                           |   | <i>Dictyocaulus viviparus</i>        | KJH44480     | VSV-----K---  | -----        | -----E---  |
|                           |   | <i>Oesophagostomum dentatum</i>      | KHJ80075     | -GI---S--K-V- | -----        | -----Q-L-  |
|                           |   | <i>Necator americanus</i>            | XP_013290957 | -SV---S--K-A- | -----        | -----EE--P |
|                           |   | <i>Toxocara canis</i>                | VDM47853     | -V-----K---   | -----        | -----E--Q  |
|                           |   | <i>Haemonchus placei</i>             | VDO38169     | -S---S--K---  | -----        | -----EE-LQ |
|                           |   | <i>Diploscapter pachys</i>           | PAV87825     | -PI--SS-VK--- | -----        | -I--T-Q--- |
|                           |   | <i>Dracunculus medinensis</i>        | VDN53121     | -SP--ES-----  | -----        | -----SE-LE |
|                           |   | <i>Enterobius vermicularis</i>       | VDD97068     | -SV--L--K---  | -----        | KH--GE-AR  |
|                           |   | <i>Anisakis simplex</i>              | VDK55739     | -S---S--K---  | -----        | TS--LEQLS  |
|                           |   | <i>Gongylonema pulchrum</i>          | VDN21460     | -PP--MT---V-  | -----        | KL--TED-V- |
|                           |   | <i>Wuchereria bancrofti</i>          | EJW87638     | -SP--LT---I-  | -----        | KL--TEE--L |
|                           |   | <i>Brugia pahangi</i>                | VDN85631     | -SP--LT---I-  | -----        | KL--TEE--L |
|                           |   | <i>Brugia malayi</i>                 | XP_001895178 | -SP--LT---I-  | -----        | KL--TEE--L |
|                           |   | <i>Litomosoides sigmodontis</i>      | VDK73513     | -SP--LT---I-  | -----        | KL--TQE--L |
|                           |   | <i>Onchocerca ochengi</i>            | VDK71796     | -SP--LT---M-  | -----        | KL--TSE--L |
|                           |   | <i>Loa loa</i>                       | XP_003141261 | -SP--LT---L-  | -----        | KL--TQE--L |
|                           |   | <i>Onchocerca flexuosa</i>           | VDO37915     | -PP--LT---I-  | -----        | KL--TPE--L |
|                           |   | <i>Thelazia callipaeda</i>           | VDN02353     | -PP--LT---I-  | -----        | NI--TPE--M |
|                           |   | <i>Acanthocheilonema viteae</i>      | VBB26498     | -PP--LT---I-  | -----        | KS--TPE-VL |

**Supplementary Figure 15.** Partial sequence alignments of a NADH dehydrogenase 1 alpha sub-complex assembly factor 2 protein with a CSI consisting of a 13 aa insertion (shown in black box) that is specific for the *Caenorhabditis* genus and not present in any other nematode species. The sequence alignment of the species *Caenorhabditis nigoni* was not observed in the BLASTP search. Many homologous sequences for this protein were not observed for non-nematode organisms in BLASTP search.

|                           |                                      | 135                 | 170                            |                                      |
|---------------------------|--------------------------------------|---------------------|--------------------------------|--------------------------------------|
| Caenorhabditis<br>(6/6)   | <i>Caenorhabditis brenneri</i>       | EGT45899            | MKESRRIKFKTNDDEGNGN            | FTAQLELTNYKAKDSGT                    |
|                           | <i>Caenorhabditis briggsae</i>       | XP_002645170        | -----                          | -----                                |
|                           | <i>Caenorhabditis elegans</i>        | NP_001024421        | -----                          | -----                                |
|                           | <i>Caenorhabditis briggsae</i>       | XP_002645169        | I--T-----                      | -----TVE-----                        |
|                           | <i>Caenorhabditis nigoni</i>         | PIC19380            | -----S--                       | -----V---K-TV-----                   |
|                           | <i>Diploscapter pachys</i>           | PAV75577            | I-----T-SSD-GS-                | T Y--T--K-----                       |
| Other Nematodes<br>(0/41) | <i>Gongylonema pulchrum</i>          | VDK68579            | -----GLTPD-GA-                 | T-----K-----                         |
|                           | <i>Onchocerca flexuosa</i>           | VDP13540            | -----GLTPD-GA-                 | T-----K-----                         |
|                           | <i>Baylisascaris schroederi</i>      | ACL31520            | -----SLTPD-GA-                 | T-----K-----                         |
|                           | <i>Ascaris suum</i>                  | BAC06575            | -----SLTPD-GA-                 | T-----K-----                         |
|                           | <i>Toxocara canis</i>                | KHN88700            | -----SLTPD-GA-                 | T-----K-----                         |
|                           | <i>Anisakis simplex</i>              | VDK45727            | -----NLTPD-GA-                 | T-----K-----                         |
|                           | <i>Litomosoides sigmodontis</i>      | VDM92971            | -----GLTPD-GA-                 | T-----K-----                         |
|                           | <i>Brugia malayi</i>                 | XP_001899521        | -----GLTPD-GA-                 | T-----K-----                         |
|                           | <i>Loa loa</i>                       | XP_003137600        | -----GLTPD-GA-                 | T-----K-----                         |
|                           | <i>Brugia pahangi</i>                | VDN91454            | -----GLTPD-GA-                 | T-----K-----                         |
|                           | <i>Brugia timori</i>                 | VDO27064            | -----GLTPD-GA-                 | T-----K-----                         |
|                           | <i>Onchocerca flexuosa</i>           | OZC08359            | -----GLTPD-GA-                 | T-----K-----                         |
|                           | <i>Pristionchus pacificus</i>        | PDM66066            | ---T---NLSPD-GA-               | T-----K-----                         |
|                           | <i>Thelazia callipaeda</i>           | VDN01526            | -----GLVPD-GA-                 | T-----K-----                         |
|                           | <i>Necator americanus</i>            | XP_013297867        | ---T-R-L-TPD-PN-               | T--K--K-----                         |
|                           | <i>Ancylostoma caninum</i>           | RCN38460            | ---T-R-L-TPD-PN-               | T--K--K-----                         |
|                           | <i>Teladorsagia circumcincta</i>     | PIO67639            | ---T-R-L-SPD-PN-               | T--K--K-----                         |
|                           | <i>Vicugna pacos</i>                 | XP_006219910        | ---T-R-L-SPD-PN-               | T--K--K-----                         |
|                           | <i>Haemonchus contortus</i>          | ADZ24723            | ---T-R-L-SPD-PN-               | T--K--K-----                         |
|                           | <i>Nippostrongylus brasiliensis</i>  | VDL70373            | ---T-R-V-TPD-PN-               | T--K--K-----                         |
|                           | <i>Ancylostoma duodenale</i>         | KIH68744            | ---T-R-L-TPD-PN-               | T--K--K-----                         |
|                           | <i>Dictyocaulus viviparus</i>        | KJH47142            | ---T-R-F-SPD-PN-               | T--K--K-----                         |
|                           | <i>Strongylus vulgaris</i>           | VDM74829            | ---T-R-L-TPD-PN-               | T--K--K-----                         |
|                           | <i>Dracunculus medinensis</i>        | VDN56371            | -----GLTPD-GA-                 | T--M--K-----                         |
|                           | <i>Ancylostoma ceylanicum</i>        | EPB67396            | ---T-R-L-TPD-PN-               | T--K--K-----                         |
|                           | <i>Oesophagostomum dentatum</i>      | KHJ98154            | ---T-R-F-TPD-PN-               | T--K--K-----                         |
|                           | <i>Angiostrongylus costaricensis</i> | VDM63399            | ---T-R-F-TPD-PN-               | T--K--K-----                         |
|                           | <i>Enterobius vermicularis</i>       | VDD87484            | -----GLSPD-GA-                 | T Y-L--K-----T--                     |
|                           | <i>Haemonchus placei</i>             | VDO32598            | -----THII-TPDDRE-              | T--K--KKC-PN--V-                     |
|                           | <i>Strongyloides ratti</i>           | XP_024509872        | I--GN--GIQNIKDSGNG             | N Y-L--R-----                        |
|                           | <i>Heligmosomoides polygyrus</i>     | VDP57378            | ---T-Q--STPD-PN-               | T--VK--K--N-C--                      |
|                           | <i>Soboliphyme baturini</i>          | VDP10778            | ---GK---VFEPDEGE-              | T--Q--Q-K--QK----                    |
|                           | <i>Trichinella spiralis</i>          | XP_003369356        | ---GN--S-VLQQ-EEPM             | H Y-----R--T--K-                     |
|                           | <i>Trichinella nativa</i>            | KRZ50882            | ---GN--S-VLQQ-EEPM             | H Y-----R--T--K-                     |
|                           | <i>Trichinella pseudospiralis</i>    | KRX93535            | ---GN--S-VLQQ-EEPM             | H Y-----R--T--K-                     |
|                           | <i>Trichinella sp. T6</i>            | KRX74678            | ---GN--S-VLQQ-EEPM             | H Y-----R--T--K-                     |
|                           | <i>Trichinella nelsoni</i>           | KRX15059            | ---GN--S-VLQQ-EEPM             | H Y-----R--T--K-                     |
|                           | <i>Trichinella zimbabwensis</i>      | KRZ08200            | ---GN--S-VLQK-EEPM             | H Y-----R--T--K-                     |
|                           | <i>Trichuris suis</i>                | KFD56086            | ---N---ILQED-ENH               | A Y---H-K-----V-                     |
|                           | <i>Trichuris trichiura</i>           | CDW58363            | ---N---ILQED-ENH               | A Y---H-K-----V-                     |
|                           | Outgroups<br>(0/>100)                | <i>Homo sapiens</i> | CAD12458                       | IE--E-L-QSQ-- -- I QF -TIC-VQLV-Q-L- |
| <i>Mus musculus</i>       |                                      | NP_085039           | LGN--TRVR -D- T -DV-ITTLR----F |                                      |

**Supplementary Figure 16.** Partial sequence alignments of a Disorganized muscle protein 1 protein with a CSI consisting of a 1 aa deletion (shown in black box) that is specific for the *Caenorhabditis* genus and not present in any other nematode species.

|                            |                                      | 54                       | 78                         |
|----------------------------|--------------------------------------|--------------------------|----------------------------|
| Caenorhabditis<br>(6/6)    | <i>Caenorhabditis elegans</i>        | NP_001024482             | VAKMVGNRKHNK D MDYYKLSRAIR |
|                            | <i>Caenorhabditis brenneri</i>       | EGT29973                 | -----                      |
|                            | <i>Caenorhabditis briggsae</i>       | XP_002644498             | -----                      |
|                            | <i>Caenorhabditis nigoni</i>         | PIC18007                 | -----                      |
|                            | <i>Caenorhabditis latens</i>         | OZG25708                 | -----                      |
|                            | <i>Caenorhabditis remanei</i>        | OZG08321                 | -----                      |
| Other Nematodes<br>(0/47)  | <i>Diploscapter pachys</i>           | PAV75468                 | L-RL--EK-N--- -T-E----M-   |
|                            | <i>Ancylostoma caninum</i>           | RCN52589                 | L-RL--E--N--- -T-E----M-   |
|                            | <i>Ancylostoma ceylanicum</i>        | EYC16575                 | L-RL--E--N--- -T-E----M-   |
|                            | <i>Ancylostoma duodenale</i>         | KIH66619                 | L-RL--E--N--- -T-E----M-   |
|                            | <i>Nippostrongylus brasiliensis</i>  | VDL69293                 | L-RL--E--N--- -T-E----M-   |
|                            | <i>Necator americanus</i>            | XP_013299955             | L-RL--E--N--- -T-E----M-   |
|                            | <i>Dictyocaulus viviparus</i>        | KJH43386                 | L-RL--E--N--- -T-E----M-   |
|                            | <i>Strongylus vulgaris</i>           | VDM74654                 | L-RL--E--N--- -T-E----M-   |
|                            | <i>Heligmosomoides polygyrus</i>     | VDP00764                 | L-RL--E--N--- -T-E----M-   |
|                            | <i>Angiostrongylus costaricensis</i> | VDM54068                 | L-RL--E--N--- -T-E----M-   |
|                            | <i>Teladorsagia circumcincta</i>     | PIO69733                 | L-RL--E--N--- -T-E----M-   |
|                            | <i>Haemonchus contortus</i>          | CDJ88503                 | L-RL--E--N--- -T-E----M-   |
|                            | <i>Haemonchus placei</i>             | VDO23124                 | L-RL--E--N--- -T-E----M-   |
|                            | <i>Pristionchus pacificus</i>        | PDM84773                 | L-RL--E--N-Q- -T-E----M-   |
|                            | <i>Toxocara canis</i>                | KHN82222                 | L-RL--EK-N-Q- -T-E----M-   |
|                            | <i>Anisakis simplex</i>              | VDK42097                 | L-RL--EK-N-Q- -T-E----M-   |
|                            | <i>Strongyloides ratti</i>           | XP_024498651             | L-RL--EK-N-Q- -T-E----M-   |
|                            | <i>Gongylonema pulchrum</i>          | VDN40596                 | L-RL--EK-N-Q- -T-E----M-   |
|                            | <i>Litomosoides sigmodontis</i>      | VDK75710                 | L-QL--E--N-Q- -T-E----M-   |
|                            | <i>Onchocerca flexuosa</i>           | OZC10835                 | L-QL--E--N-Q- -T-E----M-   |
|                            | <i>Acanthocheilonema viteae</i>      | VBB28739                 | L-QL--E--N-Q- -T-E----M-   |
|                            | <i>Brugia pahangi</i>                | VDN81825                 | L-QL--E--N-Q- -T-E----M-   |
|                            | <i>Brugia malayi</i>                 | XP_001896909             | L-QL--E--N-Q- -T-E----M-   |
|                            | <i>Onchocerca ochengi</i>            | VDK65325                 | L-QL--E--N-Q- -T-E----M-   |
|                            | <i>Wuchereria bancrofti</i>          | EJW86133                 | L-QL--E--N-Q- -T-E----M-   |
|                            | <i>Loa loa</i>                       | XP_020307442             | L-QL--E--N-Q- -T-E----M-   |
|                            | <i>Brugia timori</i>                 | VDO09094                 | M-QL--E--N-Q- -T-E----M-   |
|                            | <i>Enterobius vermicularis</i>       | VDD84864                 | L-RL--KK-N-A- -T-E----M-   |
|                            | <i>Dracunculus medinensis</i>        | VDN57494                 | L--L--EK-N-Q- -T-E----M-   |
|                            | <i>Thelazia callipaeda</i>           | VDN01542                 | L-RF--Q--NR-Q -N-D----SL-  |
|                            | <i>Soboliphyme baturini</i>          | VD094383                 | --RR--E--NKPN -N-D----L-   |
|                            | <i>Oesophagostomum dentatum</i>      | KHJ94529                 | L-RF--Q--NRAQ -N-D----SL-  |
|                            | <i>Cylicostephanus goldi</i>         | VDK85783                 | L-RF--Q--NRAQ -N-D----SL-  |
|                            | <i>Trichinella nelsoni</i>           | KRX19706                 | L-RL--MK-N-SR -T-E----M-   |
|                            | <i>Trichinella britovi</i>           | KRY49119                 | L-RL--MK-N-SR -T-E----M-   |
|                            | <i>Trichinella zimbabwensis</i>      | KRZ07064                 | L-RL--MK-N-SR -T-E----M-   |
|                            | <i>Trichinella pseudospiralis</i>    | KRX90070                 | L-RL--MK-N-SR -T-E----M-   |
|                            | <i>Trichinella spiralis</i>          | XP_003382250             | L-RL--MK-N-SR -T-E----M-   |
|                            | <i>Trichinella sp. T8</i>            | KRZ90731                 | L-RL--MK-N-SR -T-E----M-   |
|                            | <i>Trichinella patagoniensis</i>     | KRY20366                 | L-RL--MK-N-SR -T-E----M-   |
|                            | <i>Trichinella murrelli</i>          | KRX36026                 | L-RL--MK-N-SR -T-E----M-   |
| <i>Trichinella papuae</i>  | KRZ75693                             | L-RL--MK-N-SR -T-E----M- |                            |
| <i>Trichinella nativa</i>  | KRZ56336                             | L-RL--MK-N-SR -T-E----M- |                            |
| <i>Trichuris suis</i>      | KFD57331                             | M-QL--LK-N-SR -T-E----M- |                            |
| <i>Trichuris trichiura</i> | CDW53786                             | M-QL--LK-N-SR -T-E----M- |                            |
| <i>Trichinella sp. T6</i>  | KRX73529                             | --RL--L--NKPN -N-D----L- |                            |
| <i>Trichinella sp. T9</i>  | KRX62147                             | --RL--L--NKPN -N-D----L- |                            |
| Outgroups<br>(0/>100)      | <i>Homo sapiens</i>                  | AAA52411                 | --RR--K--NKP- -N-E----GL-  |
|                            | <i>Mus musculus</i>                  | CBA13447                 | ---L--L--NK-N -N-D----L-   |

**Supplementary Figure 17.** Partial sequence alignments of an ETS (E26 transformation-specific) class transcription factor protein with a CSI consisting of a 1 aa insertion (shown in black box) that is specific for the *Caenorhabditis* genus and not present in any other nematode species.

|                             |                                      | 430                                  | 466                                     |
|-----------------------------|--------------------------------------|--------------------------------------|-----------------------------------------|
| Caenorhabditis<br>(6/6)     | <i>Caenorhabditis brenneri</i>       | EGT38541                             | HLIGADSLPSRDQLDNNL V PFLPHLSNAEERAFVILN |
|                             | <i>Caenorhabditis briggsae</i>       | CAP24891                             | -----                                   |
|                             | <i>Caenorhabditis elegans</i>        | NP_001293390                         | -----                                   |
|                             | <i>Caenorhabditis nigoni</i>         | PIC55883                             | -----                                   |
|                             | <i>Caenorhabditis remanei</i>        | XP_003114575                         | -----                                   |
|                             | <i>Caenorhabditis latens</i>         | OZG11498                             | -----                                   |
| Other Nematodes<br>(0/36)   | <i>Heligmosomoides polygyrus</i>     | VD067565                             | Q-----D-----V-                          |
|                             | <i>Nippostrongylus brasiliensis</i>  | VDL79693                             | Q-----D-----V-                          |
|                             | <i>Haemonchus contortus</i>          | CDJ80361                             | Q-----D-----V-                          |
|                             | <i>Oesophagostomum dentatum</i>      | KHJ83169                             | -----S-- Q-----D-----V-                 |
|                             | <i>Ancylostoma ceylanicum</i>        | EYC04497                             | -----S-- Q-----D-----V-                 |
|                             | <i>Necator americanus</i>            | XP_013308737                         | -----S-- Q-----D-----V-                 |
|                             | <i>Angiostrongylus costaricensis</i> | VDM59654                             | Q----I--D-----V-                        |
|                             | <i>Ancylostoma caninum</i>           | RCN53200                             | -----S-- Q-----D-----V-                 |
|                             | <i>Ancylostoma duodenale</i>         | KIH54863                             | -----S-- Q-----D-----V-                 |
|                             | <i>Dictyocaulus viviparus</i>        | KJH53574                             | Q----I-SPD-----V-                       |
|                             | <i>Anisakis simplex</i>              | VDK50202                             | -----T---P-- Q-----T-D-----M-           |
|                             | <i>Toxocara canis</i>                | KHN85013                             | --V-----P-- Q-----TPD-----              |
|                             | <i>Thelazia callipaeda</i>           | VDN04120                             | --V--T---K---T-- Q-----APD-----VM-      |
|                             | <i>Dracunculus medinensis</i>        | VDN54005                             | ---S---KN--P-- Q-----SPD-----V-         |
|                             | <i>Brugia timori</i>                 | VD022248                             | -----T---K---T-- Q-----APD-----IAVM-    |
|                             | <i>Onchocerca ochengi</i>            | VDK66508                             | -----T---K---A-- Q-----APD---I-VM-      |
|                             | <i>Wuchereria bancrofti</i>          | VDM20530                             | -----T---K---T-- Q-----APD---IAVM-      |
|                             | <i>Brugia pahangi</i>                | VDN94771                             | -----T---K---T-- Q-----APD---IAVM-      |
|                             | <i>Brugia malayi</i>                 | XP_001901269                         | -----T---K---T-- Q-----APD---IAVM-      |
|                             | <i>Litomosoides sigmodontis</i>      | VDK75146                             | -----T---K---A-- Q-----APD---IAVM-      |
|                             | <i>Onchocerca flexuosa</i>           | OZC12839                             | -----T---K---A-- Q-----APD---IAVM-      |
|                             | <i>Loa loa</i>                       | XP_003140865                         | -----K---TD- Q-----APD---IAVM-          |
|                             | <i>Strongyloides ratti</i>           | XP_024507890                         | ---S---CKG--I-- Q-----AS---I-LVS-       |
|                             | <i>Trichinella zimbabwensis</i>      | KRZ03728                             | --V-P--M-ATA-VES-A SYI-NI-S-K--M-VI-    |
|                             | <i>Trichinella papuae</i>            | KRZ71993                             | --V-P--M-AIS-VES-T SYI-NI-S-K--M-VI-    |
|                             | <i>Soboliphyme baturini</i>          | VDP22009                             | --L-PG-I-TKS--EEH- Q-F---SPD---M-VS-    |
|                             | <i>Trichinella pseudospiralis</i>    | KRZ34022                             | --V-P--M-AIA-VES-A SYI-NI-S-K--M-VI-    |
|                             | <i>Trichinella patagoniensis</i>     | KRY17046                             | --V-P--M-AIA-VES-A SYI-NI-S-K--M-VI-    |
|                             | <i>Trichinella spiralis</i>          | KRY28779                             | --V-P--M-AIA-VES-A SYI-NI-S-K--M-VI-    |
|                             | <i>Trichinella nativa</i>            | OUC40531                             | --V-P--M-AIA-VES-A SYI-NI-S-K--M-VI-    |
|                             | <i>Trichinella sp. T9</i>            | KRX57766                             | --V-P--M-AIA-VES-A SYI-NI-S-K--M-VI-    |
|                             | <i>Trichinella sp. T6</i>            | KRX72098                             | --V-P--M-AIA-VES-A SYI-NI-S-K--M-VI-    |
| <i>Trichinella britovi</i>  | KRY49319                             | --V-P--M-AIA-VES-A SYI-NI-S-K--M-VI- |                                         |
| <i>Trichinella murrelli</i> | KRX38890                             | --V-P--M-AIA-VES-A SYI-NI-S-K--M-VI- |                                         |
| <i>Trichinella sp. T8</i>   | KRZ87771                             | --V-P--M-AIA-VES-A SYI-NI-S-K--M-VI- |                                         |
| <i>Trichinella nelsoni</i>  | KRX14027                             | --V-P--M-AIA-IET-A SYI-NI-S-K--M-VI- |                                         |

**Supplementary Figure 18.** Partial sequence alignments of a Glycine-rich domain-containing protein with a CSI consisting of a 1 aa insertion (shown in black box) that is specific for the *Caenorhabditis* genus and not present in any other nematode species. Homologous sequences for this protein were not observed for many non-nematode organisms in the BLASTP search.

|                                   |                                      |               |                       |                       |
|-----------------------------------|--------------------------------------|---------------|-----------------------|-----------------------|
| Caenorhabditis<br>(6/6)           | <i>Caenorhabditis elegans</i>        | NP_001255199  | DEAVAYGAAIMAAVLSG     | AEEVQDMRLIDIVPMSIG    |
|                                   | <i>Caenorhabditis remanei</i>        | XP_003097172  | -----V-----           |                       |
|                                   | <i>Caenorhabditis brenneri</i>       | EGT52753      | -----V-----           |                       |
|                                   | <i>Caenorhabditis briggsae</i>       | CAP27311      | -----V----T-          |                       |
|                                   | <i>Caenorhabditis nigoni</i>         | PIC49760      | -----V----T-          |                       |
|                                   | <i>Caenorhabditis latens</i>         | OZG13115      | -----V-----           |                       |
|                                   | <i>Diploscapter pachys</i>           | PAV72947      | -----VQ--I---         |                       |
| Other Nematodes<br>(0/55)         | <i>Anisakis simplex</i>              | VDK75896      | -----VQ--I---         | DK S-T---LL-L--A-L-L- |
|                                   | <i>Meloidogyne enterolobii</i>       | AHG55039      | -----VQ--I---         | DK S-N---LL-L--A-L-L- |
|                                   | <i>Ditylenchus destructor</i>        | AHF71091      | -----VQ--I-C-         | DK S-N---LL-L--A-L-L- |
|                                   | <i>Haemonchus contortus</i>          | CDJ88360      | -----VQ--I---         | DK S-A---LL-L--A-L-L- |
|                                   | <i>Onchocerca volvulus</i>           | P11503.2      | -----VQ--I---         | DK S-A---LL-L--A-L-L- |
|                                   | <i>Brugia malayi</i>                 | AAR01009      | -----VHS-I---         | DK S-A---LL-L--A-L-L- |
|                                   | <i>Teladorsagia circumcincta</i>     | PI068034      | -----VQ--I---         | DK S-A---LL-L--A-L-L- |
|                                   | <i>Dirofilaria immitis</i>           | AAA28298      | -----VQ--I---         | DK S-A---LL-L--A-L-L- |
|                                   | <i>Onchocerca flexuosa</i>           | VDP11183      | -----VQ--I---         | DK S-A---LL-L--A-L-L- |
|                                   | <i>Litomosoides sigmodontis</i>      | VDK67489      | -----VQ--I---         | DK S-T---LL-L--A-L-L- |
|                                   | <i>Brugia pahangi</i>                | AAA27857      | -----VQ--I---         | DK S-A---LL-L--A-L-L- |
|                                   | <i>Bursaphelenchus mucronatus</i>    | ACU00685      | -----VQ--I-C-         | DK S-N---LL-L--A-L-L- |
|                                   | <i>Enterobius vermicularis</i>       | VDD92026      | -----VQ--I---         | DK S-T---LL-L--A-L-L- |
|                                   | <i>Toxocara canis</i>                | VDM39102      | -----VQ--I---         | DK S-A---LL-L--A-L-L- |
|                                   | <i>Acanthocheilonema viteae</i>      | VBB31912      | -----VQ--I---         | DK S-A---LL-L--A-L-L- |
|                                   | <i>Wuchereria bancrofti</i>          | AAF32254      | -----VQ--I---         | DK S-A---LL-L--A-L-L- |
|                                   | <i>Pristionchus pacificus</i>        | PDM79784      | -----VQ--I---         | DK S-A---LL-L--A-L-L- |
|                                   | <i>Onchocerca ochengi</i>            | VDK66984      | -----VQ--I---         | DK S-A---LL-L--A-L-L- |
|                                   | <i>Gongylonema pulchrum</i>          | VDN19430      | -----VQ--I---         | DK S-A---LL-L--A-L-L- |
|                                   | <i>Anisakis pegreffii</i>            | AIU38247      | -----VQ--I---         | DK S-T---LL-L--A-L-L- |
|                                   | <i>Heterodera glycines</i>           | AAN78300      | -----VQ--I---         | DK S-T---LL-L--A-L-L- |
|                                   | <i>Strongylus vulgaris</i>           | VDM66254      | -----VQ--I---         | DK S-A---LL-L--A-L-L- |
|                                   | <i>Haemonchus placei</i>             | VD034176      | -----VQ--I---         | DK S-A---LL-L--A-L-L- |
|                                   | <i>Loa loa</i>                       | XP_020306180  | -----VQ--I---         | DK S-A---LL-L--A-L-L- |
|                                   | <i>Ancylostoma caninum</i>           | AK062674      | -----VQ--I---         | DK S-A---LL-L--A-L-L- |
|                                   | <i>Ancylostoma ceylanicum</i>        | EPB70622      | -----VQ--I---         | DK S-A---LL-L--A-L-L- |
|                                   | <i>Thelazia callipaeda</i>           | VDN04920      | -----SVQ--I---        | DK S-A---LL-L--A-L-L- |
|                                   | <i>Heligmosomoides polygyrus</i>     | VD081416      | -----VQ--I---         | DK S-A---LL-L--A-L-L- |
|                                   | <i>Necator americanus</i>            | XP_013293739  | -----VQ--I---         | DK S-A---LL-L--A-L-L- |
|                                   | <i>Strongyloides ratti</i>           | XP_024502726  | -----VQ--I---         | DK S-A---LL-L--A-L-L- |
|                                   | <i>Dracunculus medinensis</i>        | ADI54942      | -----VQ--I---         | DK S-A---LL-L--A-L-L- |
|                                   | <i>Angiostrongylus vasorum</i>       | ABV46675      | -----VQ--I---         | DK S-A---LL-L--A-L-L- |
|                                   | <i>Setaria digitata</i>              | AAD13154      | -----VQ--I---         | DK S-A---LLFV--A-L-L- |
|                                   | <i>Dictyocaulus viviparus</i>        | KJH46194      | -----VQ--I---         | DK S-A---LL-L--A-L-L- |
|                                   | <i>Parastrongyloides trichosuri</i>  | AAF87583      | -----VQ--I---         | DK S-A---LL-L--A-L-L- |
|                                   | <i>Aphelenchoides besseyi</i>        | AKH40414      | ----F--VQ--I-C-       | DK S-N---LL-L--A-L-L- |
|                                   | <i>Angiostrongylus costaricensis</i> | VDM64089      | -----VQ--I---         | DK S-A---LL-L--A-L-L- |
|                                   | <i>Nippostrongylus brasiliensis</i>  | VDL68456      | -----VQ--I---         | DK S-A---LL-L--A-L-L- |
|                                   | <i>Soboliphyme baturini</i>          | VDP32341      | -----VQ--I---         | EK H-A---LL-L--T-L-L- |
|                                   | <i>Bursaphelenchus xylophilus</i>    | ABG74349      | -----VQ--I-C-         | DK S-K---LL-L--A-L-L- |
|                                   | <i>Trichinella zimbabwensis</i>      | KRZ18308      | -----VQ--I---         | EK H-A---LL-L--T-L-L- |
|                                   | <i>Trichinella britovi</i>           | KRY58600      | -----VQ--I---         | EK H-A---LL-L--T-L-L- |
| <i>Trichinella spiralis</i>       | KRY38488                             | -----VQ--I--- | EK H-A---LL-L--T-L-L- |                       |
| <i>Trichinella papuae</i>         | KRZ69869                             | -----VQ--I--- | EK H-A---LL-L--T-L-L- |                       |
| <i>Trichinella pseudospiralis</i> | KRY78483                             | -----VQ--I--- | EK H-A---LL-L--T-L-L- |                       |
| <i>Trichinella sp. T8</i>         | KRZ89860                             | -----VQ--I--- | EK H-A---LL-L--T-L-L- |                       |
| <i>Trichinella nelsoni</i>        | KRX27085                             | -----VQ--I--- | EK H-A---LL-L--T-L-L- |                       |
| <i>Trichinella sp. T9</i>         | KRX62956                             | -----VQ--I--- | EK H-A---LL-L--T-L-L- |                       |
| <i>Trichinella sp. T6</i>         | KRX70487                             | -----VQ--I--- | EK H-A---LL-L--T-L-L- |                       |
| <i>Trichinella murrelli</i>       | KRX42824                             | -----VQ--I--- | EK H-A---LL-L--T-L-L- |                       |
| <i>Trichinella nativa</i>         | KRZ63003                             | -----VQ--I--- | EK H-A---LL-L--T-L-L- |                       |
| <i>Trichinella patagoniensis</i>  | KRY05166                             | -----VQ--I--- | EG N-K---LL-L--T-L-L- |                       |
| <i>Trichuris trichiura</i>        | CDW56034                             | -----VQ--I--- | DK H-A---LL-L--T-L-L- |                       |
| Outgroups<br>(0/>100)             | <i>Trichuris suis</i>                | KFD56098      | -----VQ--I---         | DK H-A---LL-L--T-L-L- |
|                                   | <i>Homo sapiens</i>                  | BAD96505      | -----VQ--I---         | DK S-N---LL-L--T-L-L- |
|                                   | <i>Mus musculus</i>                  | BAE42451      | -----VQ--I---         | DK S-N---LL-L--T-L-L- |

**Supplementary Figure 19.** Partial sequence alignments of a Heat shock protein 70 protein with a CSI consisting of a 2 aa deletion (shown in black box) that is specific for the *Caenorhabditis* genus and not present in any other nematode species. Homologous partial sequence alignments of other nematode species were not observed in the BLASTP search.

|                           |                                   | 441          | 476                                     |
|---------------------------|-----------------------------------|--------------|-----------------------------------------|
| Caenorhabditis<br>(6/6)   | <i>Caenorhabditis elegans</i>     | NP_001255199 | GERVLCSHNRQLGEISL                       |
|                           | <i>Caenorhabditis remanei</i>     | XP_003097172 | -----N--K-----V-----                    |
|                           | <i>Caenorhabditis nigoni</i>      | PIC49759     | -----N--K-----                          |
|                           | <i>Caenorhabditis briggsae</i>    | XP_002632174 | -----H--K-----                          |
|                           | <i>Caenorhabditis latens</i>      | OZG13117     | -----N--K-----V-----                    |
|                           | <i>Caenorhabditis brenneri</i>    | EGT52753     | -----T-----N--K----I--V-----            |
| Other Nematodes<br>(0/16) | <i>Pristionchus pacificus</i>     | PDM75588     | ---A-TKD-H---NFE- S G-P-TP--VPQIEVVF-I- |
|                           | <i>Anisakis simplex</i>           | VDK65257     | ---A-TKD-N---RFD- T Q-P-AP--VPQIEV-FDL- |
|                           | <i>Soboliphyme baturini</i>       | VD098716     | ---EMAA--KL--QF-- V G-P-AP--VPQIEV-FDI- |
|                           | <i>Trichinella murrelli</i>       | KRX50303     | ---EMA--KL--QF-- V G-P-AP--VPQIEV-FDI-  |
|                           | <i>Trichinella sp. T6</i>         | KRX76699     | ---EMA--KL--QF-- V G-P-AP--VPQIEV-FDI-  |
|                           | <i>Trichinella sp. T9</i>         | KRX62429     | ---EMA--KL--QF-- V G-P-AP--VPQIEV-FDI-  |
|                           | <i>Trichinella pseudospiralis</i> | KRZ33796     | ---EMA--KL--QF-- V G-P-AP--VPQIEV-FDI-  |
|                           | <i>Trichinella spiralis</i>       | KRY33164     | ---EMA--KL--QF-- I G-P-AP--VPQIEV-FDI-  |
|                           | <i>Trichinella nativa</i>         | KRZ57762     | ---EMA--KL--QF-- V G-P-AP--VPQIEV-FDI-  |
|                           | <i>Trichinella britovi</i>        | KRY58424     | ---EMA--KL--QF-- V G-P-AP--VPQIEV-FDI-  |
|                           | <i>Trichinella patagoniensis</i>  | KRY23083     | ---EMA--KL--QF-- V G-P-AP--VPQIEV-FDI-  |
|                           | <i>Trichinella sp. T8</i>         | KRZ92825     | ---EMA--KL--QF-- V G-P-AP--VPQIEV-FDI-  |
|                           | <i>Trichinella nelsoni</i>        | KRX21108     | ---EMA--KL--QF-- I G-P-AP--VPQIEV-FDI-  |
|                           | <i>Trichuris suis</i>             | KFD55321     | ---DMA--KL--QF-- V G-P-AP--VPQIEV-FDI-  |
|                           | <i>Trichuris trichiura</i>        | CDW60853     | ---DMA--KL--QF-- V G-P-AP--VPQIEV-FDI-  |
|                           | <i>Trichinella zimbabwensis</i>   | KRZ16667     | ---EMA--KL--QF-- V G-P-AP--VPQIEVAFDI-  |
| Outgroups<br>(0/>200)     | <i>Homo sapiens</i>               | AAH15699     | ---AMTKD-NL--KFE- T G-P-AP--VPQIEV-FDI- |
|                           | <i>Mus musculus</i>               | BAE29904     | ---AMTKD-NL--KFE- T G-P-AP--VPQIEV-FDI- |

**Supplementary Figure 20.** Partial sequence alignments of a Heat shock protein 70 protein with a CSI consisting of a 1 aa deletion (shown in black box) that is specific for the *Caenorhabditis* genus and not present in any other nematode species. Homologous partial sequence alignments of other nematode species were not observed in the BLASTP search.

|                           |                                      | 123          | 151                             |
|---------------------------|--------------------------------------|--------------|---------------------------------|
| Caenorhabditis<br>(6/6)   | <i>Caenorhabditis elegans</i>        | NP_001024661 | GPIIGQFCGHFEN RILNTSSHNALTLWWH  |
|                           | <i>Caenorhabditis brenneri</i>       | EGT30233     | -----K-----                     |
|                           | <i>Caenorhabditis remanei</i>        | POM49287     | -----M-----                     |
|                           | <i>Caenorhabditis briggsae</i>       | XP_002644596 | -----M-----                     |
|                           | <i>Caenorhabditis nigoni</i>         | PIC18220     | -----M-----                     |
|                           | <i>Caenorhabditis latens</i>         | OZG25193     | -----M-----                     |
| Other Nematodes<br>(0/28) | <i>Diploscapter pachys</i>           | PAV79326     | --V-----RIAP L TV--V--E--MS---- |
|                           | <i>Soboliphyme baturini</i>          | VDP02479     | -----I--KVK- R TL-A--TY--M----  |
|                           | <i>Gongylonema pulchrum</i>          | VDK29616     | ---L-----AIK- S SE-TV-TE-----   |
|                           | <i>Toxocara canis</i>                | VDM24306     | ---V-----IIR- A SE-AI--E-----   |
|                           | <i>Onchocerca flexuosa</i>           | OZC09977     | ---L-----TIR- A SE-AV-TE-----   |
|                           | <i>Onchocerca ochengi</i>            | VDK65250     | ---L-----TIR- A SE-AV-TE-----   |
|                           | <i>Thelazia callipaeda</i>           | VDN01074     | ---L-----TIR- A SE-AV-TE-----   |
|                           | <i>Wuchereria bancrofti</i>          | VDM14467     | ---L-----TIR- A SE-AV-TE-----   |
|                           | <i>Angiostrongylus costaricensis</i> | VDM52576     | -----KRT- A SE-S--TL-----       |
|                           | <i>Ancylostoma duodenale</i>         | KIH43381     | -----KLT- T SE-SV-TL-----       |
|                           | <i>Ancylostoma ceylanicum</i>        | EPB66588     | -----KLT- T SE-SV-TL-----       |
|                           | <i>Anisakis simplex</i>              | VDK46880     | ---V-----IIR- A SE-AI--E-----   |
|                           | <i>Ancylostoma caninum</i>           | RCN52527     | -----KLT- T SE-SV-TL-----       |
|                           | <i>Cylicostephanus goldi</i>         | VDK45323     | -----KRT- A SE-SS-TL-----       |
|                           | <i>Heligmosomoides polygyrus</i>     | VDP41706     | -----RRT- T TE-SV-TM-----       |
|                           | <i>Litomosoides sigmodontis</i>      | VDK71987     | ---L-----TIR- A SE-AV-TE-----   |
|                           | <i>Brugia malayi</i>                 | XP_001899277 | ---L-----TIR- A SE-AV-TE-----   |
|                           | <i>Brugia pahangi</i>                | VDN90800     | ---L-----TIR- A SE-AV-TE-----   |
|                           | <i>Brugia timori</i>                 | VDO32583     | ---L-----TIR- A SE-AV-TE-----   |
|                           | <i>Loa loa</i>                       | XP_020303780 | ---L-----TIR- A SE-AV-TE-----   |
|                           | <i>Acanthocheilonema viteae</i>      | VBB30517     | ---L-----TIR- A SE-AV-TE-----   |
|                           | <i>Oesophagostomum dentatum</i>      | KHJ99798     | -----KHS- A SE-SV-TL-----       |
|                           | <i>Haemonchus placei</i>             | VDO80095     | -----RRN- V TD-SL-TM-----       |
|                           | <i>Haemonchus contortus</i>          | CDJ98395     | -----RRN- V TD-SL-TM-----       |
|                           | <i>Necator americanus</i>            | XP_013293602 | -----KRT- T SE-SV-TL-----       |
|                           | <i>Strongylus vulgaris</i>           | VDM79066     | -----KRT- A SE-SV-TL-----       |
|                           | <i>Dictyocaulus viviparus</i>        | KJH41256     | -----KRS- I SE-SI-TL-----       |
|                           | <i>Dracunculus medinensis</i>        | VDN58727     | ---L-----LIR- A SE-AV-TE-----   |

**Supplementary Figure 21.** Partial sequence alignments of an Abnormal cell migration protein 13 protein with a CSI consisting of a 1 aa deletion (shown in black box) that is specific for the *Caenorhabditis* genus and not present in any other nematode species. Homologous sequences for this protein were not observed for many non-nematode organisms in the BLASTP search.

|                           |                                      |              | 143             | 175                |
|---------------------------|--------------------------------------|--------------|-----------------|--------------------|
| Caenorhabditis<br>(6/6)   | <i>Caenorhabditis remanei</i>        | XP_003089575 | CIHLAACSAGQWLPM | S NPHLPADLFTSCLTTP |
|                           | <i>Caenorhabditis latens</i>         | OZG15523     | -----           | -----              |
|                           | <i>Caenorhabditis elegans</i>        | NP_001293858 | -----           | -----              |
|                           | <i>Caenorhabditis nigoni</i>         | PIC32995     | -----Y---       | -----              |
|                           | <i>Caenorhabditis briggsae</i>       | XP_002632899 | -----Y---       | -----              |
|                           | <i>Caenorhabditis brenneri</i>       | EGT53100     | -----F---       | -----              |
| Other Nematodes<br>(0/38) | <i>Diploscapter pachys</i>           | PAV89799     | --Q-G--R-DEF--T | --D-----A--S--     |
|                           | <i>Soboliphyme baturini</i>          | VDP10977     | -----M-D-V---   | --E-----           |
|                           | <i>Angiostrongylus costaricensis</i> | VDM53003     | --Q---REDER---  | --E-----           |
|                           | <i>Heligmosomoides polygyrus</i>     | VD079049     | --Q---REDER--T  | --D-----           |
|                           | <i>Nippostrongylus brasiliensis</i>  | VDL64489     | --Q---REDER--T  | --E-----           |
|                           | <i>Haemonchus placei</i>             | VD026483     | --Q---REDER--T  | --D-----           |
|                           | <i>Dictyocaulus viviparus</i>        | KJH44437     | --Q---REDER--T  | --E-----           |
|                           | <i>Haemonchus contortus</i>          | CDJ97476     | --Q---REDER--T  | --D-----           |
|                           | <i>Strongylus vulgaris</i>           | VDM65179     | -----REDER--T   | --AE-----          |
|                           | <i>Ancylostoma ceylanicum</i>        | EYC05101     | -----REDER--T   | --AD-----          |
|                           | <i>Ancylostoma duodenale</i>         | KIH69120     | -----REDER--T   | --AD-----          |
|                           | <i>Ancylostoma caninum</i>           | RCN45671     | -----REDER--T   | --AD-----          |
|                           | <i>Pristionchus pacificus</i>        | PDM76953     | --Q---KV-EK---  | AAE-----A---       |
|                           | <i>Acanthocheilonema viteae</i>      | VBB31036     | ---I---GDHEL--- | DSR-----IL---      |
|                           | <i>Onchocerca ochengi</i>            | VDK78612     | ---IG--ADHEL--- | DSR-----IL---      |
|                           | <i>Thelazia callipaeda</i>           | VDN06650     | ---IG--GDNEL--- | DSR-----IL---      |
|                           | <i>Necator americanus</i>            | XP_013298983 | ---G--REDER--T  | --ADV-----         |
|                           | <i>Litomosoides sigmodontis</i>      | VDK77318     | ---IG--GDQEL--- | DSR-----IL---      |
|                           | <i>Wuchereria bancrofti</i>          | EJW88084     | ---IG--GDHEL--- | DSR-----IL---      |
|                           | <i>Brugia malayi</i>                 | CRZ22876     | ---IG--GDHEL--- | DSR-----IL---      |
|                           | <i>Brugia pahangi</i>                | VDN91436     | ---IG--GDHEL--- | DSR-----IL---      |
|                           | <i>Loa loa</i>                       | XP_020306206 | ---IG--GDHEL--- | DSR-----IL---      |
|                           | <i>Brugia timori</i>                 | VD052578     | ---IG--GDHEL--- | DSR-----IL---      |
|                           | <i>Onchocerca flexuosa</i>           | VD044874     | ---IG--ADHEL--- | DSR-----IL---      |
|                           | <i>Trichinella murrelli</i>          | KRX38173     | --Q---ARD-T--T  | D-A-----C-----     |
|                           | <i>Trichinella spiralis</i>          | KRY35465     | --Q---ARD-T--T  | D-A-----C-----     |
|                           | <i>Trichinella sp. T8</i>            | KRZ85612     | --Q---ARD-T--T  | D-A-----C-----     |
|                           | <i>Trichinella nativa</i>            | KRZ49841     | --Q---ARD-T--T  | D-A-----C-----     |
|                           | <i>Trichinella britovi</i>           | KRY46767     | --Q---ARD-T--T  | D-A-----C-----     |
|                           | <i>Trichinella sp. T6</i>            | KRX75381     | --Q---ARD-T--T  | D-A-----C-----     |
|                           | <i>Trichinella nelsoni</i>           | KRX15293     | --Q---ARD-T--T  | D-A-----C-----     |
|                           | <i>Trichinella pseudospiralis</i>    | KRY84144     | --Q---ARD-T--T  | D-A-----C-----     |
|                           | <i>Trichinella zimbabwensis</i>      | KRZ05231     | --Q---ARD-T--T  | D-A-----C-----     |
|                           | <i>Trichinella papuae</i>            | KRZ73461     | --Q---ARD-T--T  | D-A-----C-----     |
|                           | <i>Trichinella patagoniensis</i>     | KRY09658     | --Q---ARD-T--T  | D-A-----C-----     |
|                           | <i>Trichinella sp. T9</i>            | KRX61440     | --Q---ARD-T--T  | D-A-----C-----     |
|                           | <i>Trichuris suis</i>                | KFD50574     | --Q---A-D-E--T  | H-D-----C-----     |
|                           | <i>Trichuris trichiura</i>           | CDW56927     | --Q---A-D-E--T  | H-D-----C-----     |
| Outgroups<br>(0/>200)     | <i>Homo sapiens</i>                  | NP_001156506 | --Q---E-TEL---  | I-D-----           |
|                           | <i>Mus musculus</i>                  | XP_006534426 | --Q---E-HEL---  | I-D-----           |

**Supplementary Figure 22.** Partial sequence alignments of a Regulatory-associated protein of mTOR-like protein with a CSI consisting of a 1 aa insertion (shown in black box) that is specific for the *Caenorhabditis* genus and not present in any other nematode species.



|                           |                                      | 141          | 170                               |
|---------------------------|--------------------------------------|--------------|-----------------------------------|
| Caenorhabditis<br>(6/6)   | <i>Caenorhabditis elegans</i>        | NP_001024661 | SSHNALTLWWHSN                     |
|                           | <i>Caenorhabditis remanei</i>        | XP_003117772 | -----                             |
|                           | <i>Caenorhabditis briggsae</i>       | CAP33035.2   | -----                             |
|                           | <i>Caenorhabditis latens</i>         | OZG25193     | -----                             |
|                           | <i>Caenorhabditis nigoni</i>         | PIC18220     | -----                             |
|                           | <i>Caenorhabditis brenneri</i>       | EGT30233     | -----                             |
| Other Nematodes<br>(0/28) | <i>Diploscapter pachys</i>           | PAV79335     | --E--MS----A- SEV SD-EKR-----SA-- |
|                           | <i>Anisakis simplex</i>              | VDK46880     | --E-----D ADL -PNHSGE--R-L-SA--   |
|                           | <i>Toxocara canis</i>                | VDM24306     | --E-----D ADL -PNHSGE--R-L-SA--   |
|                           | <i>Angiostrongylus costaricensis</i> | VDM52576     | -TL-----TD SLL -QQHPA---R--NA--   |
|                           | <i>Dictyocaulus viviparus</i>        | KJH41256     | -TL-----TD SLL -QQHPA---R--NA--   |
|                           | <i>Gongylonema pulchrum</i>          | VDK29616     | -TE-----TD AEL -LQHSGE--R-L-SA--  |
|                           | <i>Litomosoides sigmodontis</i>      | VDK71987     | -TE-----TD AEL -FHH-GE--R-L-SA--  |
|                           | <i>Onchocerca ochengi</i>            | VDK65250     | -TE-----TD AEL -FHH-GE--R-L-SA--  |
|                           | <i>Loa loa</i>                       | XP_020303780 | -TE-----TD AEL -FHH-GE--R-L-SA--  |
|                           | <i>Brugia malayi</i>                 | CRZ25839     | -TE-----TD AEL -FHH-GE--R-L-SA--  |
|                           | <i>Brugia timori</i>                 | VD032583     | -TE-----TD AEL -FHH-GE--R-L-SA--  |
|                           | <i>Acanthocheilonema viteae</i>      | VBB30517     | -TE-----TD AEL -FHH-GE--R-L-SA--  |
|                           | <i>Brugia pahangi</i>                | VDN90800     | -TE-----TD AEL -FHH-GE--R-L-SA--  |
|                           | <i>Nippostrongylus brasiliensis</i>  | VDL77150     | -TM-----TD ALL -QQHPA---Q--NA--   |
|                           | <i>Wuchereria bancrofti</i>          | EJW83984     | -TE-----TD AEL -FHH-GD--R-L-SA--  |
|                           | <i>Haemonchus placei</i>             | VDO80095     | -TM-----TD AIL -QQHPA---Q--NA--   |
|                           | <i>Haemonchus contortus</i>          | CDJ85812     | -TM-----TD AIL -QQHPA---Q--NA--   |
|                           | <i>Thelazia callipaeda</i>           | VDN01074     | -TE-----TD AQT SFHRSGE--R-L-SA--  |
|                           | <i>Dracunculus medinensis</i>        | VDN58727     | -TE-----D ANL -INH-GE--R-L-SA--   |
|                           | <i>Onchocerca flexuosa</i>           | OZC09977     | -TE-----TD ADL -FHH-GE--R-L-SA--  |
|                           | <i>Heligmosomoides polygyrus</i>     | VDP41706     | -TM-----TD ALL SQQHPA---H--NA--   |
|                           | <i>Ancylostoma duodenale</i>         | KIH43381     | -TL-----TD PLL AQQHPA---R-Q-NA--  |
|                           | <i>Oesophagostomum dentatum</i>      | KHJ99798     | -TL-----TD PLL AQQHPA---R-Q-NA--  |
|                           | <i>Ancylostoma ceylanicum</i>        | EYB97855     | -TL-----TD PLL AQQHPA---R-Q-NA--  |
|                           | <i>Necator americanus</i>            | XP_013293602 | -TL-----TD PLL AQQHPA---R-Q-NA--  |
|                           | <i>Strongylus vulgaris</i>           | VDM79066     | -TL-----TD PLL AQQHPA---R-Q-NA--  |
|                           | <i>Ancylostoma caninum</i>           | RCN52527     | -TL-----TD PLL AQQHPA---R-Q-NA--  |
|                           | <i>Cylicostephanus goldi</i>         | VDK45323     | -TL-----TD PLL AQQHPA---R-Q-NA--  |

**Supplementary Figure 23.** Partial sequence alignments of an Abnormal cell migration protein 13 protein with a CSI consisting of a 3 aa deletion (shown in black box) that is specific for the *Caenorhabditis* genus and not present in any other nematode species. Homologous sequences for this protein were not observed for many non-nematode organisms in the BLASTP search.

|                                 |          |                                      | 220              | 251                |                    |        |
|---------------------------------|----------|--------------------------------------|------------------|--------------------|--------------------|--------|
| Caenorhabditis<br>(6/6)         | {        | <i>Caenorhabditis elegans</i>        | NP_001024660     | KGFKLHWGSFRVSKTGNC | VTGEFSCNGECIP      |        |
|                                 |          | <i>Caenorhabditis remanei</i>        | XP_003117772     | -----A-----        | -----              |        |
|                                 |          | <i>Caenorhabditis latens</i>         | OZG25193         | -----A-----        | -----              |        |
|                                 |          | <i>Caenorhabditis briggsae</i>       | XP_002644596     | -----A-----R----   | -----              |        |
|                                 |          | <i>Caenorhabditis brenneri</i>       | EGT30233         | -----R-----        | -----              |        |
|                                 |          | <i>Caenorhabditis nigoni</i>         | PIC18220         | R-----A-----R----  | -----              |        |
| Other Nematodes<br>(0/22)       | {        | <i>Diploscapter pachys</i>           | PAV79326         | -----SA---*I-VP-   | S KNR----R-D-F--   | *VKKAA |
|                                 |          | <i>Nippostrongylus brasiliensis</i>  | VDL77150         | ---Q---NA---TAQVP- | Y YGR--A---NQ---   |        |
|                                 |          | <i>Dictyocaulus viviparus</i>        | KJH41256         | ---R---NA---TANVP- | S S-R--A-SHN----   |        |
|                                 |          | <i>Angiostrongylus costaricensis</i> | VDM52576         | ---R---NA---TANVP- | S SSR--A--QS----   |        |
|                                 |          | <i>Oesophagostomum dentatum</i>      | KHJ99798         | ---R-Q-NA---TANVP- | S TSR--A--GN----   |        |
|                                 |          | <i>Haemonchus placei</i>             | VDO80095         | ---Q---NA---TAGVP- | S AGR--A--HDQ---   |        |
|                                 |          | <i>Haemonchus contortus</i>          | CDJ98395         | ---Q---NA---TAGVP- | S AGR--A--HDQ---   |        |
|                                 |          | <i>Toxocara canis</i>                | VDM24306         | E--R-L-SA--K-N-AP- | N TQR--T-A-Q----   |        |
|                                 |          | <i>Cylicostephanus goldi</i>         | VDK45323         | ---R-Q-NA---TANVP- | S PSR--A--GN----   |        |
|                                 |          | <i>Ancylostoma ceylanicum</i>        | EPB66588         | ---R-Q-NA--ITSNVP- | S SSR--A--GN----   |        |
|                                 |          | <i>Ancylostoma caninum</i>           | RCN52527         | ---R-Q-NA--ITSNVP- | S SSR--A--GN----   |        |
|                                 |          | <i>Ancylostoma duodenale</i>         | KIH43381         | ---R-Q-NA--ITSNVP- | S SSR--A--GN----   |        |
|                                 |          | <i>Necator americanus</i>            | XP_013293602     | ---R-Q-NA---TTNVP- | S PSR--A--GN----   |        |
|                                 |          | <i>Anisakis simplex</i>              | VDK46880         | E--R-L-SA--K-NSEP- | N TQR--T-A-H----   |        |
|                                 |          | <i>Rhincodon typus</i>               | XP_020369132     | E--FRHLGDDKIPRRRQ  | C LPN----S-----    |        |
|                                 |          | <i>Brugia pahangi</i>                | VDN90800         | E--R-L-SA--K-NIAP- | N IQR--T-K-Q---A   |        |
|                                 |          | <i>Brugia malayi</i>                 | CRZ25839         | E--R-L-SA--K-NIAP- | N IQR--T-K-Q---A   |        |
|                                 |          | <i>Onchocerca ochengi</i>            | VDK65250         | E--R-L-SA--K-NVAP- | N AQR--T-K-Q---A   |        |
|                                 |          | <i>Onchocerca flexuosa</i>           | OZC09977         | E--R-L-SA--K-NVAP- | N AQR--T-K-Q---A   |        |
|                                 |          | <i>Gongylonema pulchrum</i>          | VDK29616         | E--R-L-SA--K-NIAP- | N NQR--T-K-Q----   |        |
| <i>Acanthocheilonema viteae</i> | VBB30517 | E--R-L-SA--K-NIAP-                   | N AQR--T-K-Q---A |                    |                    |        |
| Outgroups<br>(0/>200)           | {        | <i>Loa loa</i>                       | XP_020303780     | E--R-L-SA--K-NIAP- | N AQR--T-R-Q---A   |        |
|                                 |          | <i>Homo sapiens</i>                  | XP_011509485     |                    | - L HN -----       |        |
|                                 |          | <i>Mus musculus</i>                  | BAD90371         |                    | - L PNQ -R-TS-Q-VL |        |

**Supplementary Figure 24.** Partial sequence alignments of an Abnormal cell migration protein 13 protein with a CSI consisting of a 1 aa deletion (shown in black box) that is specific for the *Caenorhabditis* genus and not present in any other nematode species.

|                           |                                   | 1460         | 1497                                            |
|---------------------------|-----------------------------------|--------------|-------------------------------------------------|
| Caenorhabditis<br>(6/6)   | <i>Caenorhabditis elegans</i>     | NP_500018    | MLAAWFTFLLHDHLKTY <b>D</b> AGKKLYELFWGIKQQMEKGP |
|                           | <i>Caenorhabditis remanei</i>     | XP_003099038 | -----                                           |
|                           | <i>Caenorhabditis nigoni</i>      | PIC37034     | -----F-----                                     |
|                           | <i>Caenorhabditis briggsae</i>    | XP_002634865 | -----F-----                                     |
|                           | <i>Caenorhabditis brenneri</i>    | EGT33873     | -----F-----                                     |
|                           | <i>Caenorhabditis latens</i>      | OZG19088     | -----                                           |
| Other Nematodes<br>(0/27) | <i>Diploscapter pachys</i>        | PAV71746     | --T-----MY--LKE P-RC--N-YYs---I----             |
|                           | <i>Ancylostoma ceylanicum</i>     | EPB68178     | -----M--Y-RNF ---R--D-Y-----                    |
|                           | <i>Ancylostoma duodenale</i>      | KIH66538     | -----M--Y-RNF ---R--D-Y-----                    |
|                           | <i>Brugia malayi</i>              | CRZ23938     | ----Y-I-MYRY-TEC --R----Y-AM-----               |
|                           | <i>Dictyocaulus viviparus</i>     | KJH51742     | -----Y-RNF ---R--D-Y-----                       |
|                           | <i>Haemonchus contortus</i>       | CDJ83976     | -----M--Y-RN- ---R--D-Y-----                    |
|                           | <i>Loa loa</i>                    | XP_020306889 | ----Y-I-MYRY-TEC --R----Y-AM-----               |
|                           | <i>Oesophagostomum dentatum</i>   | KHJ95623     | -----M--Y-RNF ---R--D-Y-----                    |
|                           | <i>Onchocerca flexuosa</i>        | OZC11101     | ----Y-I-MYRY-TEC --R----Y-AM-----               |
|                           | <i>Pristionchus pacificus</i>     | PDM64129     | -----S--M-NY-EES ---R-FD-Y-----                 |
|                           | <i>Strongyloides ratti</i>        | CEF60012     | --S--A-FMYKF-RDC G-QQ-FQ-Y-S---TT----           |
|                           | <i>Wuchereria bancrofti</i>       | EJW80286     | ----Y-I-MYRY-TEC --R----Y-AM-----               |
|                           | <i>Teladorsagia circumcincta</i>  | PIO53665     | -----M--Y-RN- ---R--D-Y-----                    |
|                           | <i>Toxocara canis</i>             | KHN85487     | ----Y--M-RY-RER --Q----Y-A---V----              |
|                           | <i>Trichinella britovi</i>        | KRY48614     | -----M-KY-LDC --QP-FT-Y-A---V----               |
|                           | <i>Trichinella murrelli</i>       | KRX43850     | -----M-KY-LDC --QP-FT-Y-A---V----               |
|                           | <i>Trichinella nativa</i>         | KRZ55370     | -----M-KY-LDC --QP-FT-Y-A---V----               |
|                           | <i>Trichinella nelsoni</i>        | KRX17302     | -----M-KY-LDC --QP-FT-Y-A---V----               |
|                           | <i>Trichinella patagoniensis</i>  | KRY11761     | -----M-KY-LDC --QP-FT-Y-A---V----               |
|                           | <i>Trichinella pseudospiralis</i> | KRY68294     | -----M-KY-LDC --QP-FT-Y-A---V----               |
|                           | <i>Trichinella sp. T6</i>         | KRX84092     | -----M-KY-LDC --QP-FT-Y-A---V----               |
|                           | <i>Trichinella sp. T8</i>         | KRZ95482     | -----M-KY-LDC --QP-FT-Y-A---V----               |
|                           | <i>Trichinella sp. T9</i>         | KRX59942     | -----M-KY-LDC --QP-FT-Y-A---V----               |
|                           | <i>Trichinella spiralis</i>       | KRY35089     | -----M-KY-LDC --QP-FT-Y-A---V----               |
|                           | <i>Trichinella zimbabwensis</i>   | KRZ11671     | -----M-KY-LDC --QP-FT-Y-A---V----               |
|                           | <i>Trichuris suis</i>             | KFD50499     | -----M-KY-LEC --QP-FM-Y-A---V----               |
|                           | <i>Trichuris trichiura</i>        | CDW56793     | -----MYKY-LEC --QP-FM-Y-A---V----               |
| Outgroups<br>(0/>200)     | <i>Homo sapiens</i>               | XP_011529485 | --TN-----KF--EC --EP-FL -YCA----                |
|                           | <i>Mus musculus</i>               | BAA13190     | --TN-----KF--EC --EP-FL -YCA----                |

**Supplementary Figure 25.** Partial sequence alignments of a Plexin protein with a CSI consisting of a 1 aa insertion (shown in black box) that is specific for the *Caenorhabditis* genus and not present in any other nematode species.

|                                      |                                      | 1020         | 1070                                                 |
|--------------------------------------|--------------------------------------|--------------|------------------------------------------------------|
| Caenorhabditis<br>homolog 1<br>(4/4) | <i>Caenorhabditis elegans</i>        | NP_503362    | GKPSDFWPTVTHALTYNFCRSTTTVALPAPVLYAH                  |
|                                      | <i>Caenorhabditis brenneri</i>       | EGT57012     | -VA-----N-EK L-V-----CI-Y-----T-S--Q--L----          |
|                                      | <i>Caenorhabditis latens</i>         | OZF81803     | -LA-----WN--P- CLPT-----M--A-S-----                  |
|                                      | <i>Caenorhabditis remanei</i>        | OZF90277     | -LA-----WN--P- CLPT-----M--A-S-----                  |
| Caenorhabditis<br>homolog 2<br>(5/5) | <i>Caenorhabditis brenneri</i>       | EGT32090     | -IA-----D PYVA-----L--T-SV-S-S-----                  |
|                                      | <i>Caenorhabditis briggsae</i>       | CAP22335     | -LA-----NN-K V-GT-----L--A--N-----                   |
|                                      | <i>Caenorhabditis latens</i>         | OZG10323     | -LV-----WN--K CLPT-----T-----                        |
|                                      | <i>Caenorhabditis nigoni</i>         | PIC13092     | -LA-----ND-K V-GT-----L-----S--N-----R               |
|                                      | <i>Caenorhabditis remanei</i>        | OZF89967     | -LV-----WN--K CLPT-----T-----                        |
| Other Nematodes<br>(0/46)            | <i>Diploscapter pachys</i>           | PAV88210     | -TS--A---W-E-Q PSPA---I---S--YV-CMKISISI-G-IF---     |
|                                      | <i>Ascaris suum</i>                  | AEF32755     | -TS--A--T--Y-S-N LSPDD-QQ-AY--CHLYA-CARS-SI---Y---   |
|                                      | <i>Gongylonema pulchrum</i>          | VDN33859     | -TS--S----Y-S-N LTPDE-QHL-F--CHVYA-CNRS-SI---Y---    |
|                                      | <i>Onchocerca flexuosa</i>           | OZC04814     | -TS--A--I--Y-S-H LSADE-QQLVY--CHVYA-CNKS-SI---Y---   |
|                                      | <i>Acanthocheilonema viteae</i>      | VBB30375     | -TS--S----Y-S-N LTSDE-QQL-F--CHLYA-CNRS-SI---Y---    |
|                                      | <i>Loa loa</i>                       | XP_020304102 | -TS--S--T--Y-S-H LSADE-QQMIY--CHVYA-CNKS-SI---Y---   |
|                                      | <i>Anisakis simplex</i>              | VDK54211     | -TS--A--T--Y-S-N LSADQ-QQMAY--CHLYT-CARS-SI---IY---  |
|                                      | <i>Thelazia callipaeda</i>           | VDM97873     | -TS--S--I--Y-S-L LSADE-QQMIY--CHVYA-CNKS-SI---Y---   |
|                                      | <i>Wuchereria bancrofti</i>          | VDM09830     | -TS--S--T--Y-S-H LSADE-QQMIY--CHVYA-CNKS-SI---Y---   |
|                                      | <i>Litomosoides sigmodontis</i>      | VDK72737     | -TS--S--I--Y-S-H LSADD-QQMIY--CHVYA-CNKS-SI---Y---   |
|                                      | <i>Brugia malayi</i>                 | CRZ24698     | -TS--S--T--Y-S-L LSADE-QQMIY--CHIYA-CNKS-SI---Y---   |
|                                      | <i>Brugia timori</i>                 | VD027404     | -TS--S--T--Y-S-L LSADE-QQMIY--CHIYA-CNKS-SI---Y---   |
|                                      | <i>Toxocara canis</i>                | VDM38397     | -TS--A--T--Y-S-N LLADQ-QQMAY--CHLYA-CARS-SI---Y---   |
|                                      | <i>Onchocerca ochengi</i>            | VDM92461     | -TS--A--T--Y-S-H LSADE-QQMAY--CHVYA-CNKS-SI---Y---   |
|                                      | <i>Brugia pahangi</i>                | VDN87401     | -TS--S--T--Y-S-L LSADE-QQMIY--CHIYA-CNKS-SI---Y---   |
|                                      | <i>Soboliphyme baturini</i>          | VDP12733     | -TS--S--H--W-DNN LTADELQQL-YQ-CHTYV-C-RS-SI---AY---  |
|                                      | <i>Necator americanus</i>            | XP_013299213 | -TS--S--H--W-DNE LTADELQQL-YQMCHTYV-C-RS-SI---AY---  |
|                                      | <i>Teladorsagia circumcincta</i>     | PI064661     | -TS--S--H--W-DNE LTADELQQL-YQMCHTYV-C-RS-SI---AY---  |
|                                      | <i>Heligmosomoides polygyrus</i>     | VD099643     | -TS--S--H--W-DNE LTADELQQL-YQMCHTYV-C-RS-SI---AY---  |
|                                      | <i>Haemonchus contortus</i>          | CDJ87551     | -TS--S--H--W-DNQ LTADELQQL-YQMCHTYV-C-RS-SI---AY---  |
|                                      | <i>Trichinella papuae</i>            | KRZ78211     | -TS--S--H--W-DNS LTADELQQL-YQ-CHTYV-C-RS-SI---AY---  |
|                                      | <i>Haemonchus placei</i>             | VD055419     | -TS--S--H--W-DNQ LTADELQQL-YQMCHTYV-C-RS-SI---AY---  |
|                                      | <i>Dictyocaulus viviparus</i>        | KJH45308     | -TS--S--H--W-DNE LTADELQQL-YQMCHTYV-C-RS-SI---AY---  |
|                                      | <i>Oesophagostomum dentatum</i>      | KHJ99080     | -TS--S--H--W-DNE LTADELQQL-YQMCHTYV-C-RS-SI---AY---  |
|                                      | <i>Ancylostoma caninum</i>           | RCN47663     | -TS--S--H--W-DNE LTADELQQL-YQMCHTYV-C-RS-SI---AY---  |
|                                      | <i>Pristionchus pacificus</i>        | PDM64682     | -TS--S--H--W-DSS LTADELQQL-YQMCHTYV-C-RS-SI---AY---  |
|                                      | <i>Nippostrongylus brasiliensis</i>  | VDL77997     | -TT--A--T--VY-E-S QSPDKIYEMCYR-CFLYA-CRRP-S--C--Y--- |
|                                      | <i>Strongyloides ratti</i>           | XP_024508426 | -TS--S--H--W-DNQ I-ADELQQL-YQMCHTYV-C-RS-SI---AY---  |
|                                      | <i>Ancylostoma ceylanicum</i>        | EPB70479     | -TS--S--H--W-DNE LTADELQQL-YQMCHTYV-C-RS-SI---AY---  |
|                                      | <i>Dracunculus medinensis</i>        | VDN60348     | -TS--S--H--W-DNN LTADELQQL-YQMCHTYV-C-RS-SI---AY---  |
|                                      | <i>Angiostrongylus costaricensis</i> | VDM60322     | -TS--S--H--W-DNE LTADELQQL-YQMCHTYV-C-RS-SI---AY---  |
|                                      | <i>Enterobius vermicularis</i>       | VDD85869     | -TS--S--H--W-DNS LTADELQQL-YQMCHTYV-C-RS-SI---AY---  |
|                                      | <i>Ancylostoma duodenale</i>         | KIH64115     | -TS--AR-H--W-DNN FSADEMQAI-YGMCHTYG-CARS-SI---Y---   |
|                                      | <i>Trichinella zimbabwensis</i>      | KRZ12513     | -TS--S--H--W-DNS LTADELQQL-YQ-CHTYV-C-RS-SI---AY---  |
|                                      | <i>Trichinella sp. T9</i>            | KRX66470     | -TS--S--H--W-DNS LTADELQQL-YQ-CHTYV-C-RS-SI---AY---  |
|                                      | <i>Trichinella pseudospiralis</i>    | KRY88551     | -TS--S--H--W-DNS LTADELQQL-YQ-CHTYV-C-RS-SI---AY---  |
|                                      | <i>Trichinella britovi</i>           | KRY60812     | -TS--S--H--W-DNS LTADELQQL-YQ-CHTYV-C-RS-SI---AY---  |
|                                      | <i>Trichinella murrelli</i>          | KRX48413     | -TS--S--H--W-DNS LTADELQQL-YQ-CHTYV-C-RS-SI---AY---  |
|                                      | <i>Trichinella nelsoni</i>           | KRX23112     | -TS--S--H--W-DNS LTADELQQL-YQ-CHTYV-C-RS-SI---AY---  |
|                                      | <i>Trichinella spiralis</i>          | XP_003374460 | -TS--S--H--W-DNS LTADELQQL-YQ-CHTYV-C-RS-SI---AY---  |
|                                      | <i>Trichinella sp. T6</i>            | KRX84491     | -TS--S--H--W-DNS LTADELQQL-YQ-CHTYV-C-RS-SI---AY---  |
|                                      | <i>Trichinella nativa</i>            | KRZ52696     | -TS--SY-H--W-DNN FSADEMQQL-YQ-CHTYV-C-RS-SI---AY---  |
|                                      | <i>Trichinella patagoniensis</i>     | KRY16554     | -TS--SY-H--W-DNN FSADEMQQL-YQ-CHTYV-C-RS-SI---AY---  |
|                                      | <i>Trichinella sp. T8</i>            | KRZ95990     | -TS--SY-H--W-DNN FSADEMQQL-YQ-CHTYV-C-RS-SI---AY---  |
|                                      | <i>Trichuris suis</i>                | KHJ40100     | -TS--S--H--W-DNN LSADELQQL-YQ-CHTYV-C-RS-SI---AY---  |
|                                      | <i>Trichuris trichiura</i>           | CDW54952     | -TS--S--H--W-DNN LSADELQQL-YQ-CHTYV-C-RS-SI---AY---  |
| Outgroups<br>(0/>200)                | <i>Homo sapiens</i>                  | EAW92208     | -TS--S--H--W-DNR FSSDELQIL-YQ-CHTYV-C-RS-SI---AY---  |
|                                      | <i>Mus musculus</i>                  | NP_067286    | -SVS---N-IY-SSG LKPDHIQRL-YK-CHVYNNWPGVIRV---CQ---   |

**Supplementary Figure 26.** Partial sequence alignments of a Piwi-like protein protein with a CSI consisting of a 1 aa insertion (shown in black box) that is specific for the *Caenorhabditis* genus and not present in any other nematode species. There are two homologs of this protein in the *Caenorhabditis* species, one of which contains the CSI. The sequence alignment for homolog 1 of the species *Caenorhabditis nigoni* and *Caenorhabditis briggsae* was not observed in the BLAST search.

|                                      |                                   | 70           | 99                             |
|--------------------------------------|-----------------------------------|--------------|--------------------------------|
| Caenorhabditis<br>homolog 1<br>(6/6) | <i>Caenorhabditis elegans</i>     | NP_001123124 | RAVVFRLGRLVP DVKGGPIFFIIPCIDT  |
|                                      | <i>Caenorhabditis latens</i>      | OZG25387     | -----I- E-----Q                |
|                                      | <i>Caenorhabditis remanei</i>     | XP_003117911 | -----I- E-----Q                |
|                                      | <i>Caenorhabditis briggsae</i>    | XP_002645067 | -----I- -----Q                 |
|                                      | <i>Caenorhabditis nigoni</i>      | PIC19183     | -----I- E-----L----            |
|                                      | <i>Caenorhabditis brenneri</i>    | EGT33172     | -----L- E-----Q                |
| Caenorhabditis<br>homolog 2<br>(6/6) | <i>Caenorhabditis brenneri</i>    | EGT29906     | ---I-----M- G GA-----V----     |
|                                      | <i>Caenorhabditis briggsae</i>    | XP_002644793 | ---I-----M- G GA-----V----     |
|                                      | <i>Caenorhabditis nigoni</i>      | PIC18440     | ---I-----M- G GA-----V----     |
|                                      | <i>Caenorhabditis elegans</i>     | NP_001024566 | ---I-----M- G GA-----V----     |
|                                      | <i>Caenorhabditis latens</i>      | OZG24410     | ---I-----M- G GA-----V----     |
|                                      | <i>Caenorhabditis remanei</i>     | OZF84041     | ---I-----IK G GT----L--VL----  |
| Other<br>Nematodes<br>(0/26)         | <i>Diploscapter pachys</i>        | PAV57820     | -V-I--I----F G GAR--MI-----    |
|                                      | <i>Ancylostoma ceylanicum</i>     | EPB70273     | -V-I--I----F G GAR--MI-----    |
|                                      | <i>Ancylostoma duodenale</i>      | KIH68818     | ---I-----M- G GA-----VL----S   |
|                                      | <i>Ascaris suum</i>               | ERG80781     | -V-I--I----F G GAR--MI-V-----  |
|                                      | <i>Brugia malayi</i>              | XP_001895378 | ---I-----MT G KAR---L--L----S  |
|                                      | <i>Dictyocaulus viviparus</i>     | KJH43651     | -V-I--I----F G GAR--MI-----    |
|                                      | <i>Haemonchus contortus</i>       | CDJ89985     | ---I-----M- G GA-----V----     |
|                                      | <i>Loa loa</i>                    | XP_020302578 | ---I-----MT G RAR---L--L----S  |
|                                      | <i>Necator americanus</i>         | XP_013298666 | -V-I--I----F G GAR--MI-----    |
|                                      | <i>Oesophagostomum dentatum</i>   | KHJ99155     | -V-I--I----F G GAR--MI-V-----  |
|                                      | <i>Pristionchus pacificus</i>     | PDM83777     | ---I-----M- G GA-----V----     |
|                                      | <i>Strongyloides ratti</i>        | CEF62830     | ---I-----M- G GA-----V----     |
|                                      | <i>Toxocara canis</i>             | KHN87924     | ---I-----M- G GA-----V----     |
|                                      | <i>Trichinella britovi</i>        | KRY60162     | -V-I-----M- G VAR---LV--M----- |
|                                      | <i>Trichinella murrelli</i>       | KRX44897     | -V-I-----M- G VAR---LV--M----- |
|                                      | <i>Trichinella nativa</i>         | KRZ62504     | -V-I-----M- G VAR---LV--M----- |
|                                      | <i>Trichinella nelsoni</i>        | KRX16776     | -V-I-----M- G VAR---LV--M----- |
|                                      | <i>Trichinella papuae</i>         | KRZ74240     | -V-I-----M- G VAR---LV--M----- |
|                                      | <i>Trichinella patagoniensis</i>  | KRY18828     | -V-I-----M- G VAR---LV--M----- |
|                                      | <i>Trichinella pseudospiralis</i> | KRZ26557     | -V-I-----M- G VAR---LV--M----- |
|                                      | <i>Trichinella sp. T6</i>         | KRX75325     | -V-I-----M- G VAR---LV--M----- |
|                                      | <i>Trichinella sp. T8</i>         | KRZ95329     | -V-I-----M- G VAR---LV--M----- |
|                                      | <i>Trichinella sp. T9</i>         | KRX56998     | -V-I-----M- G VAR---LV--M----- |
|                                      | <i>Trichinella spiralis</i>       | XP_003380470 | -V-I-----M- G VAR---LV--M----- |
|                                      | <i>Trichuris suis</i>             | KHJ43320     | -V-I-----M- G VAR---LV--M----- |
|                                      | <i>Trichuris trichiura</i>        | CDW55292     | -V-I-----M- G VA---LV--M-----  |
| Outgroups<br>(0/>100)                | <i>Homo sapiens</i>               | NP_001257456 | E--II-----IL Q GGA----L--L--T- |
|                                      | <i>Mus musculus</i>               | AAH58224     | E-----IQ A DKA----LILVL----    |

**Supplementary Figure 27.** Partial sequence alignments of a Stomatin protein with a CSI consisting of a 1 aa deletion (shown in black box) that is specific for the *Caenorhabditis* genus and not present in any other nematode species. There are two homologs of this protein in the *Caenorhabditis* species, one of which contains the CSI.

|                           |                                      | 257          | 280                         |
|---------------------------|--------------------------------------|--------------|-----------------------------|
| Caenorhabditis<br>(6/6)   | <i>Caenorhabditis elegans</i>        | NP_001123140 | QCQGCVWSKR RTAGERVYTVKATI   |
|                           | <i>Caenorhabditis nigoni</i>         | PIC17654     | -----                       |
|                           | <i>Caenorhabditis briggsae</i>       | XP_002644340 | -----                       |
|                           | <i>Caenorhabditis latens</i>         | OZG25237     | -----                       |
|                           | <i>Caenorhabditis remanei</i>        | POM50721     | -----                       |
|                           | <i>Caenorhabditis brenneri</i>       | EGT30457     | -----                       |
| Other Nematodes<br>(0/27) | <i>Diploscapter pachys</i>           | PAV65431     | -----N-A-- H KLHSDK-C-----  |
|                           | <i>Cylicostephanus goldi</i>         | VDK64261     | ----- H -LPN-K-----         |
|                           | <i>Ancylostoma duodenale</i>         | KIH53513     | ----- H -LPN-K-----         |
|                           | <i>Necator americanus</i>            | XP_013303822 | ----- H -LPN-K-----         |
|                           | <i>Ancylostoma ceylanicum</i>        | EPB79691     | ----- H -LPN-K-----         |
|                           | <i>Strongylus vulgaris</i>           | VDM75426     | ----- H -LPN-K-----         |
|                           | <i>Haemonchus placei</i>             | VDO32683     | ----- H -LSNDK-----         |
|                           | <i>Ancylostoma caninum</i>           | RCN33227     | ----- H -LPN-K-----         |
|                           | <i>Oesophagostomum dentatum</i>      | KHJ98476     | ----- H -LPN-K-----         |
|                           | <i>Anisakis simplex</i>              | VDK42437     | ----- R -KGP-A--S-R--       |
|                           | <i>Angiostrongylus costaricensis</i> | VDM58682     | ----- H -LGNDK-----         |
|                           | <i>Haemonchus contortus</i>          | CDJ90030     | ----- H -LSNDK-----         |
|                           | <i>Dictyocaulus viviparus</i>        | KJH48789     | ----- H -LSNDK-----         |
|                           | <i>Toxocara canis</i>                | VDM36538     | -----R- R KKGPA--S-R--      |
|                           | <i>Dracunculus medinensis</i>        | VDN50960     | -----I---- H KKGP-A--S----- |
|                           | <i>Brugia timori</i>                 | VDO47024     | -----N-- N KQGP-T-----      |
|                           | <i>Brugia malayi</i>                 | XP_001898198 | -----N-- N KQGP-T-----      |
|                           | <i>Brugia pahangi</i>                | VDN91899     | -----N-- N KQGP-T-----      |
|                           | <i>Acanthocheilonema viteae</i>      | VBB29420     | -----N-- N KRGP-T---R--     |
|                           | <i>Enterobius vermicularis</i>       | VDD93518     | -----R- H KKGPA--S-R--      |
|                           | <i>Wuchereria bancrofti</i>          | VDM08568     | -----N-- N KQGP-T---R--     |
|                           | <i>Litomosoides sigmodontis</i>      | VDK70981     | -----N-- N KRGR-T---R--     |
|                           | <i>Loa loa</i>                       | XP_020303432 | -----N-- N KRGP-T---R--     |
|                           | <i>Onchocerca ochengi</i>            | VDK64311     | -----N-- N KLGP-T---R--     |
|                           | <i>Onchocerca flexuosa</i>           | OZC10900     | -----N-- N KLGP-T---R--     |
|                           | <i>Pristionchus pacificus</i>        | PDM60715     | ---SS--R- H KLGA--Y-----    |
|                           | <i>Thelazia callipaeda</i>           | VDN04565     | ----SI-N-- H KRGP-T--S-R--  |
| Outgroups<br>(0/>200)     | <i>Homo sapiens</i>                  | CAB45716     | H-L--I--R- D KKENKHLAP-IR-- |
|                           | <i>Mus musculus</i>                  | XP_006529331 | H-L--I--Q- D KKENKHLAP-IR-- |

**Supplementary Figure 28.** Partial sequence alignments of a Ral guanine nucleotide dissociation stimulator protein with a CSI consisting of a 1 aa deletion (shown in black box) that is specific for the *Caenorhabditis* genus and not present in any other nematode species.

|                                 |                                      | 261                            | 290                            |
|---------------------------------|--------------------------------------|--------------------------------|--------------------------------|
| Caenorhabditis<br>(6/6)         | <i>Caenorhabditis elegans</i>        | NP_001309573                   | VYTDKSGAASISIRLPPK             |
|                                 | <i>Caenorhabditis nigoni</i>         | PIC44232                       | -----T----V-----               |
|                                 | <i>Caenorhabditis brenneri</i>       | EGT39972                       | -----T-----                    |
|                                 | <i>Caenorhabditis remanei</i>        | XP_003117505                   | -----T-----                    |
|                                 | <i>Caenorhabditis latens</i>         | OZF84301                       | -----T-----                    |
|                                 | <i>Caenorhabditis briggsae</i>       | XP_002630298                   | -----T----V-----               |
| Other Nematodes<br>(0/38)       | <i>Diploscapter pachys</i>           | PAV72156                       | I--R---TVAV---V- E AH-----     |
|                                 | <i>Ancylostoma duodenale</i>         | KIH42539                       | L---T--T-VA---E- S -----       |
|                                 | <i>Ancylostoma ceylanicum</i>        | EYC03167                       | L---T--T-VA---E- S -----       |
|                                 | <i>Oesophagostomum dentatum</i>      | KHJ79213                       | L---T--T-VA---E- T --T-----    |
|                                 | <i>Necator americanus</i>            | XP_013296219                   | L---T--T-VA---E- S -----       |
|                                 | <i>Teladorsagia circumcincta</i>     | PI069203                       | L---T--T-VA---E- S -----       |
|                                 | <i>Dictyocaulus viviparus</i>        | KJH44272                       | L---T--T-VA-K--D- S -----R-    |
|                                 | <i>Haemonchus contortus</i>          | CDJ95820                       | L---T--T-VA---E- P -----       |
|                                 | <i>Pristionchus pacificus</i>        | PDM62223                       | C---R-----AVEI--E A A-N-----   |
|                                 | <i>Loa loa</i>                       | XP_020304904                   | -QA-R---T--VTMSNG A LN-----RY  |
|                                 | <i>Ancylostoma caninum</i>           | RCN36404                       | L---T--T-VA---E- S -----       |
|                                 | <i>Heligmosomoides polygyrus</i>     | VD063815                       | L---T--T-VQ---E- S -----       |
|                                 | <i>Nippostrongylus brasiliensis</i>  | VDL71649                       | L---T--T-VA---D- S --T-----    |
|                                 | <i>Haemonchus placei</i>             | VDO42404                       | L---T--T-VA---E- P -----       |
|                                 | <i>Angiostrongylus costaricensis</i> | VDM53344                       | L---T--T-VA---E- Y --N-----    |
|                                 | <i>Strongylus vulgaris</i>           | VDM79582                       | -T--T-VA---E- S --T-----       |
|                                 | <i>Anisakis simplex</i>              | VDK45457                       | ILA-----T---NMCNE A L-----     |
|                                 | <i>Dracunculus medinensis</i>        | VDN59128                       | -QA-R---T---KMCSE A L-----     |
|                                 | <i>Enterobius vermicularis</i>       | VDD88292                       | -QA-----T--VSMCRE A L-T-----   |
|                                 | <i>Soboliphyme baturini</i>          | VDO95451                       | IFA-----T-A-NMS-D T VGH-----   |
|                                 | <i>Thelazia callipaeda</i>           | VDN04471                       | -KA-R---TV-VTMSNQ A MN-----Y   |
|                                 | <i>Gongylonema pulchrum</i>          | VDN27534                       | LQA-R---T---TMSTE A LN-----    |
|                                 | <i>Onchocerca ochengi</i>            | VDK64948                       | -KA-R---T---TMSNE A LN-----R-  |
|                                 | <i>Litomosoides sigmodontis</i>      | VDK72628                       | -KA-R---T---TMSNE A LN-----R-  |
|                                 | <i>Acanthocheilonema viteae</i>      | VBB29959                       | -KA-R---T--VTMSNE A LN-----R-  |
|                                 | <i>Wuchereria bancrofti</i>          | VDM15282                       | -KA-R---T---TMSNE A LN-----R-  |
|                                 | <i>Brugia pahangi</i>                | VDN85976                       | -KA-R---T---TMSNE A LN-----R-  |
|                                 | <i>Strongyloides ratti</i>           | CEF60189                       | INS-D---T--LNMKNS D SKF-----R- |
|                                 | <i>Trichinella murrelli</i>          | KRX49645                       | -PA-QT---TVAVNMS-D C TR-----R- |
|                                 | <i>Trichinella nelsoni</i>           | KRX21745                       | -PA-QT---TVAVNMS-D C TR-----R- |
|                                 | <i>Trichinella pseudospiralis</i>    | KRX94659                       | -PA-QT---TVAVNMS-D C TR-----R- |
|                                 | <i>Trichinella sp. T6</i>            | KRX72173                       | -PA-QT---TVAVNMS-D Y TR-----R- |
| <i>Trichinella sp. T8</i>       | KRZ90868                             | -PA-QT---TVAVNMS-D C TR-----R- |                                |
| <i>Trichinella spiralis</i>     | KRY34230                             | -PA-QT---TVAVNMS-D C TR-----R- |                                |
| <i>Trichinella zimbabwensis</i> | KRZ08997                             | -PA-QT---TVAVNMS-D C TR-----R- |                                |
| <i>Trichuris suis</i>           | KFD55831                             | -PA-----TVA-NMS-E C TKN-----R- |                                |
| <i>Trichuris trichiura</i>      | CDW54076                             | -PA-----TVA-NMS-E C TKN-----R- |                                |
| <i>Toxocara canis</i>           | KHN77300                             | -LA-----T---NMCSE A L-----     |                                |

**Supplementary Figure 29.** Partial sequence alignments of a Transglutaminase/ protease homolog protein with a CSI consisting of a 1 aa deletion (shown in black box) that is specific for the *Caenorhabditis* genus and not present in any other nematode species. Homologous sequences for this protein were not observed for many non-nematode organisms in the BLASTP search.

|                           |                                   | 209          | 242                                  |
|---------------------------|-----------------------------------|--------------|--------------------------------------|
| Caenorhabditis<br>(6/6)   | <i>Caenorhabditis elegans</i>     | NP_001033544 | FELQSEDMIE S VKLSNHTLPYMIHGLGIPYLATY |
|                           | <i>Caenorhabditis remanei</i>     | OZG06150     | -----V-- - IR--S-----                |
|                           | <i>Caenorhabditis latens</i>      | OZG25132     | -----V-- - IR--S-----                |
|                           | <i>Caenorhabditis briggsae</i>    | XP_002644672 | Y-----E-V N IR--T-----S--            |
|                           | <i>Caenorhabditis nigoni</i>      | PIC18362     | Y-----E-V N IR--T-----S--            |
|                           | <i>Caenorhabditis brenneri</i>    | EGT30451     | Y-----V-- N IR--H-----D--            |
| Other Nematodes<br>(0/21) | <i>Diploscapter pachys</i>        | PAV83346     | YH-I---R-S LNIPKRAQ-QFNLII-LSSYEIH   |
|                           | <i>Ancylostoma ceylanicum</i>     | EYC37437     | YL-LA--QLS LSANRASQ-CQFLMA-L-TCES-   |
|                           | <i>Ancylostoma duodenale</i>      | KIH69031     | YR-LA--QLS LSANRTSQ-CQFLMA-L-TCES-   |
|                           | <i>Brugia malayi</i>              | XP_001898333 | -S-TT--R-- MCTCDQGNLTLF-MSSV-HENV-   |
|                           | <i>Dictyocaulus viviparus</i>     | KJH48985     | YR-L---RLS LSVKANSQ--QFSLA-V-SCDS-   |
|                           | <i>Haemonchus contortus</i>       | CDJ90309     | YR-LA--RLS FSSKTFSH-CQVSMVA-V-AIES-  |
|                           | <i>Loa loa</i>                    | XP_020303866 | -T-TT--R-- MYTCDRGNLTFL-MSSL--ENV-   |
|                           | <i>Necator americanus</i>         | XP_013308897 | YR-LA--QLS LSAK-CSQ-WQFSMA-L-SCES-   |
|                           | <i>Oesophagostomum dentatum</i>   | KHJ99848     | YS-LA--RLS LSANRSSQ-CQFSMA-L-CFES-   |
|                           | <i>Strongyloides ratti</i>        | CEF63947     | -MITA--I-D MNGVLPNQLHRLKMF----DKE-   |
|                           | <i>Wuchereria bancrofti</i>       | EJW85503     | -N-TT--R-- MCTCDRGNLTFL-MSSV-HENV-   |
|                           | <i>Pristionchus pacificus</i>     | PDM64559     | YD--A--R-S LA--AR-TAAQV-LGAL-HDGL-   |
|                           | <i>Trichinella britovi</i>        | KRY47448     | -SVF---I-- M-D-EMLSCHQY-FS-L-GDQL-   |
|                           | <i>Trichinella murrelli</i>       | KRX47109     | -SVF---I-- M-D-EMLSCHQY-FS-L-GDQL-   |
|                           | <i>Trichinella nativa</i>         | KRZ60864     | -SVF---I-- M-D-EMLSCHQY-FS-L-GDQL-   |
|                           | <i>Trichinella nelsoni</i>        | KRX17237     | -SVF---I-- M-D-EMLSCHQY-FS-L-GDQL-   |
|                           | <i>Trichinella patagoniensis</i>  | KRY18874     | -SVF---I-- M-D-EMLSCHQY-FS-L-GDQL-   |
|                           | <i>Trichinella pseudospiralis</i> | KRX88958     | -SVF---I-- M-D-EMLSCHQY-FS-L-GDQL-   |
|                           | <i>Trichinella sp. T6</i>         | KRX73586     | -SVF---I-- M-D-EMLSCHQY-FS-L-GDQL-   |
|                           | <i>Trichinella sp. T9</i>         | KRX53517     | -SVF---I-- M-D-EMLSCHQY-FS-L-GDQL-   |
|                           | <i>Trichinella spiralis</i>       | KRY28374     | -SVF---I-- M-D-EMLSCHQY-FS-L-GDQL-   |

**Supplementary Figure 30.** Partial sequence alignments of a Vacuolar protein sorting-associated protein 41 homolog protein with a CSI consisting of a 1 aa insertion (shown in black box) that is specific for the *Caenorhabditis* genus and not present in any other nematode species. Homologous sequences for this protein were not observed for many non-nematode organisms in the BLASTP search



|                          |   |                                      | 13           | 36         |                   |
|--------------------------|---|--------------------------------------|--------------|------------|-------------------|
| Caenorhabditis<br>(6/6)  | { | <i>Caenorhabditis elegans</i>        | NP_001317731 | EPTYAEAHK  | RPNEALLCFATPSDL   |
|                          |   | <i>Caenorhabditis brenneri</i>       | EGT44953     | -----      | -----             |
|                          |   | <i>Caenorhabditis briggsae</i>       | XP_002631115 | -----      | -----             |
|                          |   | <i>Caenorhabditis latens</i>         | OZG11344     | -----      | -----S-T--        |
|                          |   | <i>Caenorhabditis nigoni</i>         | PIC46074     | -----      | -----             |
|                          |   | <i>Caenorhabditis remanei</i>        | XP_003117041 | -----      | -----S-T--        |
| Caenorhabditis<br>(0/36) | { | <i>Diploscapter pachys</i>           | PAV79982     | -V---D---K | EQ---II---SRR--   |
|                          |   | <i>Angiostrongylus costaricensis</i> | VDM55226     | -V-F-D---  | N ER--GVV---RE--  |
|                          |   | <i>Haemonchus placei</i>             | VDO40680     | -V-F-D---  | N ER--GVV---RE--  |
|                          |   | <i>Haemonchus contortus</i>          | CDJ85139     | -V-F-D---  | N ER--GVV---RE--  |
|                          |   | <i>Teladorsagia circumcincta</i>     | PIO62909     | -V-F-D---  | N ER--GVV---RE--  |
|                          |   | <i>Strongylus vulgaris</i>           | VDM65061     | -V-F-D---  | N ER--GVV---RE--  |
|                          |   | <i>Heligmosomoides polygyrus</i>     | VDO83327     | -V-F-D---  | N ER--GVV---RE--  |
|                          |   | <i>Necator americanus</i>            | XP_013301253 | -V-F-D---  | N ER--GVV---RE--  |
|                          |   | <i>Ancylostoma ceylanicum</i>        | EYC17281     | -V-F-D---  | N ER--GVV---RE--  |
|                          |   | <i>Nippostrongylus brasiliensis</i>  | VDL76374     | -V-F-D---  | N ER--GVV---RE--  |
|                          |   | <i>Dictyocaulus viviparus</i>        | KJH49634     | -V-F-D---  | N ER--GVV---RE--  |
|                          |   | <i>Pristionchus pacificus</i>        | PDM73741     | -V---D---  | Q VR--GII---SR--- |
|                          |   | <i>Onchocerca flexuosa</i>           | VDP18596     | -V-F-D---  | Q H---GIV--L-RE-- |
|                          |   | <i>Litomosoides sigmodontis</i>      | VDK84450     | -V-F-D---  | Q H---GIV--L-RE-- |
|                          |   | <i>Enterobius vermicularis</i>       | VDD86392     | -V---D---  | E H---GIV---SRE-- |
|                          |   | <i>Onchocerca ochengi</i>            | VDK67641     | -V-F-D---  | Q H---GIV--L-RE-- |
|                          |   | <i>Loa loa</i>                       | XP_020301701 | -V-F-D---  | Q H---GIV--L-RD-- |
|                          |   | <i>Gongylonema pulchrum</i>          | VDN25083     | -V-F-D---  | Q HA--GIV--L-RE-- |
|                          |   | <i>Brugia pahangi</i>                | VDN91487     | -V-F-D---  | Q H---GIV--L-RD-- |
|                          |   | <i>Brugia malayi</i>                 | XP_001902042 | -V-F-D---  | Q H---GIV--L-RD-- |
|                          |   | <i>Wuchereria bancrofti</i>          | VDM20183     | -V-F-D---  | Q H---GIV--L-RD-- |
|                          |   | <i>Dracunculus medinensis</i>        | VDN51147     | -V-F-D---  | Q -A--GVV--L-RE-- |
|                          |   | <i>Thelazia callipaeda</i>           | VDN03402     | -V-F-D---  | Q H---GIV--L-RD-- |
|                          |   | <i>Toxocara canis</i>                | KHN86131     | -V-F-D---  | Q HA--GVV--Q-RD-- |
|                          |   | <i>Trichinella patagoniensis</i>     | KRY13721     | -V---D--R  | I KKH-GIV---SHYE- |
|                          |   | <i>Trichinella pseudospiralis</i>    | KRX92226     | -V---D--R  | I KKH-GIV---SHYE- |
|                          |   | <i>Trichinella papuae</i>            | KRZ74679     | -V---D--R  | I KKH-GIV---SHYE- |
|                          |   | <i>Trichinella nelsoni</i>           | KRX21810     | -V---D--R  | I KKH-GIV---SHYE- |
|                          |   | <i>Trichinella sp. T6</i>            | KRX82412     | -V---D--R  | I KKH-GIV---SHYE- |
|                          |   | <i>Trichinella spiralis</i>          | KRY35895     | -V---D--R  | I KKH-GIV---SHYE- |
|                          |   | <i>Trichinella sp. T8</i>            | KRZ90387     | -V---D--R  | I KKH-GIV---SHYE- |
|                          |   | <i>Trichinella sp. T9</i>            | KRX54744     | -V---D--R  | I KKH-GIV---SHYE- |
|                          |   | <i>Trichinella nativa</i>            | KRZ60668     | -V---D--R  | I KKH-GIV---SHYE- |
|                          |   | <i>Trichinella murrelli</i>          | KRX48392     | -V---D--R  | I KKH-GIV---SHYE- |
|                          |   | <i>Trichinella britovi</i>           | KRY51015     | -V---D--R  | I KKH-GIV---SHYE- |
|                          |   | <i>Trichuris suis</i>                | KFD48640     | -V---D--R  | A AR--GVV--TSH-E- |
| Outgroups<br>(0/>200)    | { | <i>Mus musculus</i>                  | AAH26944     | -V---D---  | G -K--GVIE-VSY--M |
|                          |   | <i>Homo sapiens</i>                  | AAA36649     | -V---D---  | G -K--GVIE-VSY--M |

**Supplementary Figure 31.** Partial sequence alignments of a Serine/arginine-rich splicing factor protein with a CSI consisting of a 1 aa deletion (shown in black box) that is specific for the *Caenorhabditis* genus and not present in any other nematode species.

|                           |                                      | 159          | 191                                     |
|---------------------------|--------------------------------------|--------------|-----------------------------------------|
| Caenorhabditis<br>(6/6)   | <i>Caenorhabditis nigoni</i>         | PIC40784     | YGLACDLLWSDPA <b>Q</b> PERNGWGLSHRGISFT |
|                           | <i>Caenorhabditis briggsae</i>       | XP_002642928 | -----S-----                             |
|                           | <i>Caenorhabditis elegans</i>        | NP_001249242 | -----S-----                             |
|                           | <i>Caenorhabditis remanei</i>        | OZF95316     | -----G-----                             |
|                           | <i>Caenorhabditis latens</i>         | OZF87542     | -----G-----                             |
|                           | <i>Caenorhabditis brenneri</i>       | EGT35952     | -----V---E <b>S</b> TSNI--S--A-----S    |
| Other Nematodes<br>(0/47) | <i>Diploscapter pachys</i>           | PAV85879     | T--L-----D KDVT---END--V---             |
|                           | <i>Ancylostoma caninum</i>           | RCN49073     | --IG-----S -Q-D--V-----L---             |
|                           | <i>Ancylostoma ceylanicum</i>        | EPB70403     | --IG-----S -Q-D--V-----                 |
|                           | <i>Cylicostephanus goldi</i>         | VDK48331     | --IG-----S -Q-D--V-----P                |
|                           | <i>Necator americanus</i>            | XP_013307020 | --IG-----S -Q-D--V-----                 |
|                           | <i>Oesophagostomum dentatum</i>      | KHJ94276     | --IG-----S -QKD--V-----                 |
|                           | <i>Strongylus vulgaris</i>           | VDM70279     | --IG-----S -QKD--V-----                 |
|                           | <i>Ancylostoma duodenale</i>         | KIH43961     | --IG-----S -Q-D--V-----LP-              |
|                           | <i>Haemonchus contortus</i>          | CDJ91010     | --IG--V----- LQ-D--V-----               |
|                           | <i>Haemonchus placei</i>             | VD028303     | --IG--V----- LQ-D--V-----               |
|                           | <i>Heligmosomoides polygyrus</i>     | VDP38261     | --IG--V----- -H-D--T-----               |
|                           | <i>Dictyocaulus viviparus</i>        | KJH47949     | --IG-----S VQGD--I-----                 |
|                           | <i>Teladorsagia circumcincta</i>     | PI071578     | --IG--V----- LH-D--V-----               |
|                           | <i>Angiostrongylus costaricensis</i> | VDM53877     | --IG-----S TLGD--I-----                 |
|                           | <i>Toxocara canis</i>                | VDM43604     | --M--V---D EKH---SM-Q-----              |
|                           | <i>Onchocerca flexuosa</i>           | OZC05533     | --VM--V---D DRYP--A--A-----             |
|                           | <i>Litomosoides sigmodontis</i>      | VDM93365     | --M--I---D DRYP--A--A-----              |
|                           | <i>Wuchereria bancrofti</i>          | EJW73884     | --M--I---D DRYP--A--A-----              |
|                           | <i>Brugia timori</i>                 | VD032279     | --M--I---D DRYP--A--A-----              |
|                           | <i>Brugia malayi</i>                 | CRZ25408     | --M--I---D DRYP--A--A-----              |
|                           | <i>Brugia pahangi</i>                | VDN91264     | --M--I---D DRYP--A--A-----              |
|                           | <i>Anisakis simplex</i>              | VDK25200     | --I--V---D DKY--A--P-----               |
|                           | <i>Onchocerca ochengi</i>            | VDM94263     | --MM--V---D DRYP--A--A-----             |
|                           | <i>Acanthocheilonema viteae</i>      | VBB31930     | --M--T---D DRYP--A--A-----              |
|                           | <i>Loa loa</i>                       | XP_020300975 | --M--T---D DRYP--A--A-----              |
|                           | <i>Thelazia callipaeda</i>           | VDN06638     | --M--T---D DRYP--A--A-----              |
|                           | <i>Pristionchus pacificus</i>        | PDM74400     | --M--V---D NKYP--A--T---Y-              |
|                           | <i>Soboliphyme baturini</i>          | VDP06334     | F--I--I---R ALTM--AE-N-----             |
|                           | <i>Gongylonema pulchrum</i>          | VDK49626     | IR-L-----D KDVQ---END--V---             |
|                           | <i>Radopholus similis</i>            | AZN18358     | Q--L-----D KDVQ---END--V---             |
|                           | <i>Nippostrongylus brasiliensis</i>  | VDL74770     | T--L-----D KDVT---END--V---             |
|                           | <i>Strongyloides ratti</i>           | XP_024505874 | Q--L-----D KDVT---END--V---             |
|                           | <i>Enterobius vermicularis</i>       | VDD86098     | T--L-----D KDVQ---END--V---             |
|                           | <i>Trichinella spiralis</i>          | XP_003377232 | F--C-----D -GHK--AENA--V---             |
|                           | <i>Trichinella nelsoni</i>           | KRX27798     | F--C-----D -GHK--AENA--V---             |
|                           | <i>Trichinella papuae</i>            | KRZ80860     | --MC-----E QGL--AENA--V---              |
|                           | <i>Trichinella zimbabwensis</i>      | KRZ19022     | --MC-----E QGL--AENA--V---              |
|                           | <i>Trichinella pseudospiralis</i>    | KRY91030     | --C-----E QGL--AENA--V---               |
|                           | <i>Trichinella nativa</i>            | OUC48627     | F--C-----E -GLK--AENT--V---             |
|                           | <i>Trichinella sp. T8</i>            | KRZ92852     | F--C-----E -GLK--AENT--V---             |
|                           | <i>Trichinella britovi</i>           | KRY60959     | F--C-----E -GLK--AENT--V---             |
|                           | <i>Trichinella patagoniensis</i>     | KRY19678     | F--C-----E -GLK--AENA--V---             |
|                           | <i>Trichinella sp. T6</i>            | KRX85648     | F--C-----E -GLK--AENT--V---             |
|                           | <i>Trichinella sp. T9</i>            | KRX64885     | F--C-----E -GLK--AENT--V---             |
|                           | <i>Trichinella murrelli</i>          | KRX48811     | F--C-----E -GLK--AENT--V---             |
|                           | <i>Trichuris suis</i>                | KFD70703     | T--L-----D KDVQ---END--V---             |
|                           | <i>Trichuris trichiura</i>           | CDW56051     | --F--V-A--D STIE---E-P-----             |
| Outgroups<br>(0/>200)     | <i>Homo sapiens</i>                  | NP_996756    | Q--L-----D KDVQ---END--V---             |
|                           | <i>Mus musculus</i>                  | BAE42366     | T--L-----D KDVQ---END--V---             |

**Supplementary Figure 32.** Partial sequence alignments of a Serine/threonine-protein phosphatase protein with a CSI consisting of a 1 aa insertion (shown in black box) that is specific for the *Caenorhabditis* genus and not present in any other nematode species.

|                                      |                                   |              | 761                   | 804                         |
|--------------------------------------|-----------------------------------|--------------|-----------------------|-----------------------------|
| Caenorhabditis<br>homolog 1<br>(6/6) | <i>Caenorhabditis elegans</i>     | NP_001317749 | GYESMTMEQIFFHLQALYFC  | RPPGGSTGELTAKDARQHYSTRVN    |
|                                      | <i>Caenorhabditis brenneri</i>    | EGT34367     | -F-DFGLDKLY--IA--TW-  | SAREEFPL-TKLTHPATP-F---     |
|                                      | <i>Caenorhabditis briggsae</i>    | CAP35351     | -FDNDNTRK---RVA--S--  | A-RDTEIDYV-QREHPTD-F---     |
|                                      | <i>Caenorhabditis latens</i>      | OZF91768     | -F-DEKPKL-----T--NY-  | SSRSLRSLAEQLTFTHPTN-F---    |
|                                      | <i>Caenorhabditis nigoni</i>      | PIC48108     | -F-DLSF-KLY-RIG--KW-  | S-RSPL-L-DQL-QVHATT-F---    |
|                                      | <i>Caenorhabditis remanei</i>     | XP_003109959 | -F-NYDI-KLY--IH--N--  | A-RDT-SLDEAMGWIHPTD-F---    |
| Caenorhabditis<br>homolog 2<br>(0/6) | <i>Caenorhabditis elegans</i>     | NP_506520    | -FQNFSQ-M--LAY-NNW-   | S LVRPKHYIQIILT-VHAPSKY-AM  |
|                                      | <i>Caenorhabditis brenneri</i>    | EGT35769     | -F-DVSDM--YNY-VRR-    | E TSSSPKNR--MLRRTHPTSRF---  |
|                                      | <i>Caenorhabditis briggsae</i>    | CAP25386     | -FQNFSQ-M--LAY-NNW-   | S LVRPKHYIQIILT-VHAPSKY-AM  |
|                                      | <i>Caenorhabditis latens</i>      | OZF96819     | -FDDA-G--M--YNY-FRQ-  | D VSDPNFRP-HLKNRPHPTPRY---  |
|                                      | <i>Caenorhabditis nigoni</i>      | PIC46155     | HF--LSS--L--VGY-QVW-  | G AKTPETKTL-LLT-PHSPETA---  |
|                                      | <i>Caenorhabditis remanei</i>     | XP_003109896 | -FDDA-G--M--YNY-FRQ-  | D VSDPNFRH-HLKNRPHPTPRY---  |
| Other<br>Nematodes<br>(0/27)         | <i>Ancylostoma caninum</i>        | AAG29103     | -L-QY-PN---WITYGYSW-  | M SQTDS-LIRQLLT-VHSPG-C---  |
|                                      | <i>Ancylostoma ceylanicum</i>     | AAQ75757     | -L-QY-PN---WITYGYSW-  | M SQTDS-LIRQLLT-VHSPG-C---  |
|                                      | <i>Ancylostoma duodenale</i>      | KIH50844     | -L-QY-PN---WITYGYSW-  | M SQTDS-LIRQLLT-VHSPG-C---  |
|                                      | <i>Brugia malayi</i>              | CDP96775     | -L-HLD-N----LSS-QMW-  | G HSRPAALIRQVLT-QHAPLRL---  |
|                                      | <i>Dictyocaulus viviparus</i>     | KJH41117     | -L-QFDN--M--LGY-TVW-  | G HSTVD-LIN-ILT-SHAPQKY---  |
|                                      | <i>Diploscapter pachys</i>        | PAV57490     | -FQNFS--M--LAY-NNW-   | A LIRPKYVQ-ALT-VHSPSKY-AI   |
|                                      | <i>Haemonchus contortus</i>       | AAC31568     | -L-KF-PN---WISYGYSW-  | A KETQS-LVKRLLTNPHSPN-C---  |
|                                      | <i>Loa loa</i>                    | XP_020303789 | -L-NLD-N----LSS-QTW-  | G HSRPAALIRQVLT-QHAPSRF---  |
|                                      | <i>Necator americanus</i>         | XP_013303479 | TT-DI-AD-L--LGWG IIL- | E KYGEEELNAILV-NHAPSVL---   |
|                                      | <i>Oesophagostomum dentatum</i>   | KHJ99552     | -L-QYNN--M--LGY-TVW-  | G HSTDD-MIN-ILT-PHSPQRY---  |
|                                      | <i>Onchocerca flexuosa</i>        | OZC11274     | -L-HLD-D---LSS-QMW-   | G HSRPAALIRHILTGQHAPLRF---  |
|                                      | <i>Pristionchus pacificus</i>     | PDM80021     | -L--F-PD---WITYGGTW-  | M KLTDERLARQLMT-VHSPS-C--D  |
|                                      | <i>Strongyloides ratti</i>        | CEF59415     | -F-KYSND---MSY-QTW-   | G KAKQP-VIRQILG-PHSPMRF---  |
|                                      | <i>Teladorsagia circumcincta</i>  | PI072527     | -L-QYNN--M--MGY-TTW-  | G HMTKDALIN-ILT-PHSPERY---  |
|                                      | <i>Toxocara canis</i>             | KHN75499     | -L-HYSDD-L--INS-YTW-  | A ISRPAQVLDLSLLN-GHSPHRY--- |
|                                      | <i>Wuchereria bancrofti</i>       | EJW80247     | -MSDF-D----LSF-QVW-   | G HQTKEAQIKQVLTNEHSPAKY---  |
|                                      | <i>Trichinella murrelli</i>       | KRX48555     | -LVN--ND---LSY-NFW-   | G HKKPAAALQQVLT-PHSPMF--I   |
|                                      | <i>Trichinella nelsoni</i>        | KRX16250     | -LVN--ND---LSY-NFW-   | G HKKPAAALQQVLT-PHSPMF--I   |
|                                      | <i>Trichinella papuae</i>         | KRZ70145     | -LVN--ND---LSY-NFW-   | G HKKPAAALQQVLT-PHSPMF--I   |
|                                      | <i>Trichinella patagoniensis</i>  | KRY15148     | -LVN--ND---LSY-NFW-   | G HKKPAAALQQVLT-PHSPMF--I   |
|                                      | <i>Trichinella pseudospiralis</i> | KRX92259     | -LVN--ND---LSY-NFW-   | G HKKPAAALQQVLT-PHSPMF--I   |
|                                      | <i>Trichinella sp. T6</i>         | KRX75996     | -LVN--ND---LSY-NFW-   | G HKKPAAALQQVLT-PHSPMF--I   |
|                                      | <i>Trichinella sp. T8</i>         | KRZ86267     | -LVN--ND---LSY-NFW-   | G HKKPAAALQQVLT-PHSPMF--I   |
|                                      | <i>Trichinella sp. T9</i>         | KRX55739     | -LVN--ND---LSY-NFW-   | G HKKPAAALQQVLT-PHSPMF--I   |
|                                      | <i>Trichinella spiralis</i>       | XP_003372438 | -LVN--ND---LSY-NFW-   | G HKKPAAALQQVLT-PHSPMF--I   |
|                                      | <i>Trichinella zimbabwensis</i>   | KRZ10628     | -LVN--ND---LSY-NFW-   | G HKKPAAALQQVLT-PHSPMF--I   |
|                                      | <i>Trichuris trichiura</i>        | CDW59783     | SL-QF--D---LSF-NFY-   | G NSTNMF LHKMININEHAPDR---  |

**Supplementary Figure 33.** Partial sequence alignments of NEPrilysin metallopeptidase family protein with a CSI consisting of a 1 aa deletion (shown in black box) that is specific for the *Caenorhabditis* genus and not present in any other nematode species. There are two homologs of this protein in the *Caenorhabditis* species, one of which contains the CSI.

|                           |                                   | 224          | 262                                       |
|---------------------------|-----------------------------------|--------------|-------------------------------------------|
| Caenorhabditis<br>(6/6)   | <i>Caenorhabditis elegans</i>     | NP_001251923 | CPFRHSEKQVLKQKLGSDAI L KKEQIERIAELAEINQYD |
|                           | <i>Caenorhabditis brenneri</i>    | EGT35184     | -----IAL---R-S-EEV - ---HV-----A----      |
|                           | <i>Caenorhabditis briggsae</i>    | XP_002640609 | -----S-ESV - ---VD-----S----              |
|                           | <i>Caenorhabditis nigoni</i>      | PIC54883     | -----S-ESV - ---VD--S-----                |
|                           | <i>Caenorhabditis remanei</i>     | OZF76862     | -----SGES- - --D-V-L-VD---S----           |
|                           | <i>Caenorhabditis latens</i>      | OZG16059     | -----AGES- - --D-VDL-VD---S----           |
| Other Nematodes<br>(0/27) | <i>Ancylostoma ceylanicum</i>     | EYB89256     | ---K-LDH-L-A-R-EK-GL NRN-VNQ-VNYSKASA--   |
|                           | <i>Ancylostoma duodenale</i>      | KIH58777     | ---K-LDH-L-A-R-EK-GL NRN-VNQ-VNYSKASA--   |
|                           | <i>Brugia malayi</i>              | XP_001901741 | --Y---DLRL-T-N-E-SGL S-S---H-TL-SKNK---   |
|                           | <i>Carlito syrichta</i>           | XP_008068171 | -----DPEL-----Q-YK- SPGG-SQ-LD-VKGTH-Q    |
|                           | <i>Dictyocaulus viviparus</i>     | KJH47173     | ---K-VHHPQ-AER-EKGL NTD--NH-INYSKA-AF-    |
|                           | <i>Diploscapter pachys</i>        | PAV61350     | ---A-M-TAL-T-R-KNCD- SDVEV-N-VGFSKTR---   |
|                           | <i>Haemonchus contortus</i>       | CDJ95440     | ---K-LDN-L-A-R-EK-GL NR---SQ-VNYTKT-AF-   |
|                           | <i>Loa loa</i>                    | XP_020307065 | --Y---DL-P-V-N-R-SGL S-S---H-TL-SKNT---   |
|                           | <i>Necator americanus</i>         | XP_013292330 | ---K-LDH-L-A-R-EK-GL NRD--SQ-VNYSKISA--   |
|                           | <i>Oesophagostomum dentatum</i>   | KHJ79721     | ---K-LDQ-L-A-R-QK-GL NAN--NQ-VNYSKASA--   |
|                           | <i>Onchocerca flexuosa</i>        | OZC08232     | --Y--NDL-S-A-N-ENSGL S-PKS-H-IL-SKNT---   |
|                           | <i>Pristionchus pacificus</i>     | PDM67073     | ---K--TEDN--SI-KANK- -S-D-DEMIA-SKI--F-   |
|                           | <i>Strongyloides ratti</i>        | CEF65434     | ---K--D-RN-IHL-RNMGL TT--VDVVL-QIKT-RF-   |
|                           | <i>Toxocara canis</i>             | KHN76917     | -----DAT--A-M-EKVLG L-HE-AT-VD-SKSS---    |
|                           | <i>Wuchereria bancrofti</i>       | EJW88833     | --Y---DLRL-A-N-E-SGL P-S---H-TL-SKN----   |
|                           | <i>Trichinella papuae</i>         | KRZ77714     | ---K-CDAEH-Q-L-KNCG- H-DD-KN-VSY-SN-H-N   |
|                           | <i>Trichinella pseudospiralis</i> | KRZ28229     | ---K-CDAEH-Q-L-KNCG- H-DD-KN-VNY-SN-H-N   |
|                           | <i>Trichinella sp. T9</i>         | KRX62449     | ---K-CDAEH-Q-L-KNCG- H-DN-KN-VNY-SN-H-N   |
|                           | <i>Trichinella zimbabwensis</i>   | KRZ08210     | ---K-CDAEH-Q-L-KNCG- H-DD-KN-VSY-SN-H-N   |
|                           | <i>Trichinella nativa</i>         | OUC41177     | ---K-CDAEH-Q-L-KNCG- H-DN-KN-VNY-SN-H-N   |
|                           | <i>Trichinella sp. T6</i>         | KRX74683     | ---K-CDAEH-Q-L-KNCG- H-DN-KN-VNY-SN-H-N   |
|                           | <i>Trichinella britovi</i>        | KRY25348     | ---K-FDAEH-Q-L-KNCG- H-DN-KN-VNY-SN-H-N   |
|                           | <i>Trichinella nelsoni</i>        | KRX15057     | ---K-CDAEH-Q-L-KNCG- H-DD-KN-VNY-SN-H-N   |
|                           | <i>Trichinella spiralis</i>       | KRY40501     | ---K-CDAEH-Q-L-KNCG- H-DD-KN-VNY-SN-H-N   |
|                           | <i>Trichoplax adhaerens</i>       | XP_002114281 | -----TDPDL-R-R-L-NGL SS-GAKE-T---KGSH-Q   |
|                           | <i>Trichuris suis</i>             | KFD55183     | ---K-CDT---R-L-TEWGI G-DDA-K-V-FSQWKR--   |
|                           | <i>Trichuris trichiura</i>        | CDW57123     | ---K-CDV---R-L-TEWGI G-DDA-K-V-FSQWKR--   |
| Outgroups<br>(0/>100)     | <i>Homo sapiens</i>               | XP_016866496 | -----DPEL-----Q-YK- SP GG-SQ-LD-VKGTH-    |
|                           | <i>Mus musculus</i>               | XP_011236757 | -----DAEL----MQ-YK- PA SG-SQ-LD-VKG-H-    |

**Supplementary Figure 34.** Partial sequence alignments of a DNA PRImase homolog protein with a CSI consisting of a 1 aa insertion (shown in black box) that is specific for the *Caenorhabditis* genus and not present in any other nematode species.

|                           |                                      | 56           | 91                                         |
|---------------------------|--------------------------------------|--------------|--------------------------------------------|
| Caenorhabditis<br>(6/6)   | <i>Caenorhabditis elegans</i>        | NP_001252372 | SSGIDGRLVASATGRF LGNMRHSYFANRNVMAKRR       |
|                           | <i>Caenorhabditis brenneri</i>       | EGT32311     | -C-V-----S--L -R-IH-PF----SI-S----         |
|                           | <i>Caenorhabditis latens</i>         | OZG16099     | ---V---L---S--L -K-NHLPF----L-T----        |
|                           | <i>Caenorhabditis briggsae</i>       | XP_002640718 | -C-V-----L -K--H-PF-----LLQ----            |
|                           | <i>Caenorhabditis remanei</i>        | OZF76907     | -C-V---L---S--L -K-NHLPF----L-----         |
|                           | <i>Caenorhabditis nigoni</i>         | PIC54820     | -C-V-----L -K--H-PF----LLQ----             |
| Other Nematodes<br>(0/24) | <i>Loa loa</i>                       | XP_020306018 | -A-A---QV-LN--L AAV GSEKDFLFN---V-LT-L-K   |
|                           | <i>Wuchereria bancrofti</i>          | EJW81713     | -A-A---QV-LN--L AAI GSEKDFVFN-C-V-LT-V-K   |
|                           | <i>Onchocerca flexuosa</i>           | VDO78063     | -V-G---QV-LN--L AAV GSEKDFLFN-CQV-LT-I-K   |
|                           | <i>Acanthocheilonema viteae</i>      | VBB34527     | -A-A---QV-LN--L AAV GSERDFLFS-C-V-LT-L-K   |
|                           | <i>Litomosoides sigmodontis</i>      | VDM91432     | -A-A---QV-LN--L AAV GSQKDFLFS-C-V-LT-V-K   |
|                           | <i>Brugia pahangi</i>                | VDN83211     | -A-A---QV-LN--L AAI RSEKDFVFN-C-V-LT-M-K   |
|                           | <i>Brugia timori</i>                 | VD023402     | -A-A---QV-LN--L AAI RSEKDFVFN-C-V-LT-V-K   |
|                           | <i>Onchocerca ochengi</i>            | VDK89390     | -V-G---QV-LN--L AAV GSEKDFLFN-CQV-LT-V-K   |
|                           | <i>Thelazia callipaeda</i>           | VDM97139     | -V-A---QI-LN--L VAS GSEKDFGFSVCQV--TVVKK   |
|                           | <i>Gongylonema pulchrum</i>          | VDN40914     | -V-G---II-QN--L APH ESDNDL-FN-C-V--T-L-K   |
|                           | <i>Dracunculus medinensis</i>        | VDN51116     | -V-G----V-LN--I VPH GTQRDVFFK-C-VL-TVI-K   |
|                           | <i>Toxocara canis</i>                | VDM40044     | TV-A---EV-LN-HI VPR HAQIDFPFNSC-VA-T-V-K   |
|                           | <i>Angiostrongylus costaricensis</i> | VDM56220     | -C-V---LL--N--L ATF GSS-DFAFSVLKSAL-IT--   |
|                           | <i>Dictyocaulus viviparus</i>        | KJH41983     | -C-V---LL--N--L VTF GST-DYGFVSVL--SSLTIS-- |
|                           | <i>Strongylus vulgaris</i>           | VDM65762     | -C-A--K-LL-TN--L VTT CHIKDYGFSLKLTALT-V-K  |
|                           | <i>Nippostrongylus brasiliensis</i>  | VDL81967     | -C-V---LL--N--L ATF ASAVD-PFCFVKAALT-T--   |
|                           | <i>Haemonchus contortus</i>          | CDJ92092     | -C-V---LL-SN--L VTF ASPCDYGFSLMKSSLT-T--   |
|                           | <i>Haemonchus placei</i>             | VDO35340     | -C-V---LL-SN--L VTF ASPCDYGFSLMKSSLT-T--   |
|                           | <i>Ancylostoma duodenale</i>         | KIH63320     | -C-L--KVLL-TN--L VTI ANTVDGFGSLLKLTALTIV-- |
|                           | <i>Ancylostoma ceylanicum</i>        | EYB93854     | -C-L--KVLL-TN--L VTI ANTVDGFGSLLKLTALTIV-- |
|                           | <i>Ancylostoma caninum</i>           | RCN47650     | -C-L--KVLL-TN--L VTI ANTVDGFGSLLKLTALTIV-- |
|                           | <i>Pristionchus pacificus</i>        | PDM66927     | TA-A--MEL-MN-KV VPR GCGQDL-VNLHTEPIL-I-    |
|                           | <i>Enterobius vermicularis</i>       | VDD92248     | TV-A--Q-NL-L---L LPA CKQRQFNFGGI-TLLS--KK  |
|                           | <i>Oesophagostomum dentatum</i>      | KHJ81200     | TC-A--K-LL--N-L VTP SHTSDYGFSLKLTALCIV--   |

**Supplementary Figure 35.** Partial sequence alignments of a Probable maleylacetoacetate isomerase protein with a CSI consisting of a 3 aa deletion (shown in black box) that is specific for the *Caenorhabditis* genus and not present in any other nematode species. Homologous sequences for this protein were not observed for many non-nematode organisms in the BLASTP search.

|                                      |   |                                      | 39           | 61        |                 |
|--------------------------------------|---|--------------------------------------|--------------|-----------|-----------------|
| Caenorhabditis<br>Homolog 1<br>(5/5) | } | <i>Caenorhabditis elegans</i>        | NP_001254102 | VVYLYQFPR | P ANRQPNLSPYCLK |
|                                      |   | <i>Caenorhabditis brenneri</i>       | EGT46528     | -----     | -----F---       |
|                                      |   | <i>Caenorhabditis briggsae</i>       | XP_002630778 | -----     | ---L-----       |
|                                      |   | <i>Caenorhabditis nigoni</i>         | PIC46704     | -----     | ---L-----F---   |
|                                      |   | <i>Caenorhabditis remanei</i>        | XP_003108831 | -----     | --KL-----F---   |
| Caenorhabditis<br>Homolog 2<br>(0/6) | } | <i>Caenorhabditis brenneri</i>       | EGT48831     | -----     | CRLL----S--M-   |
|                                      |   | <i>Caenorhabditis elegans</i>        | NP_496813    | -----     | -RLL----F-M-    |
|                                      |   | <i>Caenorhabditis latens</i>         | OZG18599     | -----     | TRLL-----F-M-   |
|                                      |   | <i>Caenorhabditis nigoni</i>         | PIC26241     | -----     | I-TV----S----   |
|                                      |   | <i>Caenorhabditis briggsae</i>       | CAP37749     | -----     | TRVL----TF-M-   |
|                                      |   | <i>Caenorhabditis remanei</i>        | XP_003102439 | -----     | TRLL-----F-M-   |
| Other Nematodes<br>(0/41)            | } | <i>Diploscapter pachys</i>           | PAV87405     | T---F---- | TQHL-----F---   |
|                                      |   | <i>Brugia malayi</i>                 | XP_001898570 | I-----N-  | -SSS--I--F-F-   |
|                                      |   | <i>Ancylostoma ceylanicum</i>        | EPB73791     | T-----    | SKAL--V--F---   |
|                                      |   | <i>Ancylostoma duodenale</i>         | KIH57073     | T-----    | SPVL-----F-M-   |
|                                      |   | <i>Ascaris suum</i>                  | ERG82980     | -----K-   | SPIM--I--F---   |
|                                      |   | <i>Dictyocaulus viviparus</i>        | KJH50494     | -----     | CKEI-----F---   |
|                                      |   | <i>Haemonchus contortus</i>          | CDJ97726     | I-----    | -RSV----T----   |
|                                      |   | <i>Loa loa</i>                       | XP_003138099 | -I-----S- | -SSS--I--F-F-   |
|                                      |   | <i>Necator americanus</i>            | XP_013293585 | T-----    | SPVL-----F---   |
|                                      |   | <i>Oesophagostomum dentatum</i>      | KHJ90324     | T-----    | SKYV--V--F---   |
|                                      |   | <i>Onchocerca flexuosa</i>           | OZC11826     | -----N-   | -SSS--I--F-F-   |
|                                      |   | <i>Pristionchus pacificus</i>        | PDM61759     | I-----    | SPIL-----       |
|                                      |   | <i>Strongyloides ratti</i>           | CEF67762     | -----K-   | TPAL--M--F---   |
|                                      |   | <i>Wuchereria bancrofti</i>          | EJW83270     | -----N-   | -SSS--I--F-F-   |
|                                      |   | <i>Teladorsagia circumcincta</i>     | PIO65880     | -----     | PKML-----       |
|                                      |   | <i>Haemonchus placei</i>             | VD062328     | I-----    | -KSV-----       |
|                                      |   | <i>Pristionchus pacificus</i>        | PDM61759     | I-----    | SPIL-----       |
|                                      |   | <i>Strongylus vulgaris</i>           | VDM84836     | I-----    | -KTV--I-----    |
|                                      |   | <i>Heligmosomoides polygyrus</i>     | VDP08595     | -----     | SPVM-----F---   |
|                                      |   | <i>Ancylostoma ceylanicum</i>        | EPB76689     | -----     | SPVL-----F---   |
|                                      |   | <i>Dictyocaulus viviparus</i>        | KJH50494     | -----     | CKEI-----F---   |
|                                      |   | <i>Toxocara canis</i>                | KHN81881     | -----     | VKCI-----F---   |
|                                      |   | <i>Nippostrongylus brasiliensis</i>  | VDL85117     | -----     | SPTV--V--F---   |
|                                      |   | <i>Angiostrongylus costaricensis</i> | VDM52956     | -----     | SKTI--M--F---   |
|                                      |   | <i>Acanthocheilonema viteae</i>      | VBB33885     | -----     | VKHI--I--F---   |
|                                      |   | <i>Anisakis simplex</i>              | VDK43584     | I-----    | SKGI-S--F---    |
|                                      |   | <i>Gongylonema pulchrum</i>          | VDK37804     | -----     | -KCI-SQ--F---   |
|                                      |   | <i>Thelazia callipaeda</i>           | VDN01285     | -----G-   | S-SA--I--F-F-   |
|                                      |   | <i>Onchocerca ochengi</i>            | VDK63043     | -----N-   | -SSS--I--F-F-   |
|                                      |   | <i>Wuchereria bancrofti</i>          | EJW83270     | -----N-   | -SSS--I--F-F-   |
|                                      |   | <i>Litomosoides sigmodontis</i>      | VDK72690     | I-----S-  | -SSS--I--F-F-   |
|                                      |   | <i>Loa loa</i>                       | XP_003138099 | -I-----S- | -SSS--I--F-F-   |
|                                      |   | <i>Enterobius vermicularis</i>       | VDD85294     | -----     | VKYV-SF--F---   |
|                                      |   | <i>Soboliphyme baturini</i>          | VDP18697     | ---F----  | SSFI--I--F---   |
|                                      |   | <i>Brugia pahangi</i>                | VDN88413     | I-----N-  | -SSS--I--F-F-   |
|                                      |   | <i>Brugia malayi</i>                 | CTP81381     | I-----N-  | -SSS--I--F-F-   |
|                                      |   | <i>Brugia timori</i>                 | VD023595     | I-----N-  | -SSS--I--F-F-   |
|                                      |   | <i>Ancylostoma caninum</i>           | RCN39977     | -----     | TKIL-SP-AP---   |
|                                      |   | <i>Trichinella spiralis</i>          | XP_003373650 | ---F-P--  | STYI--I--FS--   |
|                                      |   | <i>Trichinella zimbabwensis</i>      | KRZ10264     | ---F-P--  | STYI--I--FS--   |
|                                      |   | <i>Trichinella pseudospiralis</i>    | KRX89604     | ---F-P--  | STYI--I--FS--   |

**Supplementary Figure 36.** Partial sequence alignments of a Glutathione S-transferase protein with a CSI consisting of a 1 aa insertion (shown in black box) that is specific for the *Caenorhabditis* genus and not present in any other nematode species. There are two homologs of this protein in the *Caenorhabditis* species, one of which contains the CSI. The sequence alignment for homolog 1 of the species *Caenorhabditis latens* was not observed in the BLASTP search.

|                            |                                      | 32                    | 52                             |
|----------------------------|--------------------------------------|-----------------------|--------------------------------|
| Caenorhabditis<br>(6/6)    | <i>Caenorhabditis elegans</i>        | NP_001254124          | KYQVVKYH <b>S</b> NIPMSPLTTHRL |
|                            | <i>Caenorhabditis briggsae</i>       | XP_002646742          | ----- -                        |
|                            | <i>Caenorhabditis nigoni</i>         | PIC45241              | ----- -                        |
|                            | <i>Caenorhabditis remanei</i>        | XP_003113789          | -----R-- -                     |
|                            | <i>Caenorhabditis latens</i>         | OZG16232              | ----- -                        |
|                            | <i>Caenorhabditis brenneri</i>       | EGT55705              | ----- - K-----                 |
| Other Nematodes<br>(0/30)  | <i>Diploscapter pachys</i>           | PAV72616              | -K--R-P IV-L---A---            |
|                            | <i>Ancylostoma ceylanicum</i>        | EYC06479              | ---I--- HV-C---A---            |
|                            | <i>Ancylostoma duodenale</i>         | KIH68239              | ---I--- HV-C---A---            |
|                            | <i>Brugia malayi</i>                 | XP_001896433          | -R--IR-E YV-L---SA---          |
|                            | <i>Dictyocaulus viviparus</i>        | KJH48055              | ----- HV-C---A---              |
|                            | <i>Haemonchus contortus</i>          | CDJ98226              | ----- HV-C---A---              |
|                            | <i>Oesophagostomum dentatum</i>      | KHJ95417              | ---I--- RV-C---A---            |
|                            | <i>Necator americanus</i>            | XP_013301552          | ---I--- HV-C---A---            |
|                            | <i>Pristionchus pacificus</i>        | PDM61696              | -R--T-E H--L---A---            |
|                            | <i>Wuchereria bancrofti</i>          | EJW74639              | -R--IR-E YV-L---SA---          |
|                            | <i>Haemonchus placei</i>             | VD036023              | ----- HV-C---A---              |
|                            | <i>Heligmosomoides polygyrus</i>     | VDP18530              | ----- HV-C---A---              |
|                            | <i>Nippostrongylus brasiliensis</i>  | VDL81814              | ----- HV-C---A---              |
|                            | <i>Ancylostoma caninum</i>           | RCN34876              | ---I--- HV-C---A---            |
|                            | <i>Angiostrongylus costaricensis</i> | VDM60974              | -----D HV-C---A---             |
|                            | <i>Dracunculus medinensis</i>        | VDN60070              | -R--R-Q R--L---A---            |
|                            | <i>Soboliphyme baturini</i>          | VDP07701              | Q---R-V AV-L---SQ--            |
|                            | <i>Thelazia callipaeda</i>           | VDN02079              | -R--R-Q YV-L---SA---           |
|                            | <i>Litomosoides sigmodontis</i>      | VDK68374              | -H--IR-E Y--L---SA---          |
|                            | <i>Enterobius vermicularis</i>       | VDD95055              | -R----D FL-L---SA---           |
|                            | <i>Onchocerca flexuosa</i>           | VDP20800              | -R--IR-T YV-L---SA---          |
|                            | <i>Onchocerca ochengi</i>            | VDK83226              | -R--IR-A YV-L---SA---          |
|                            | <i>Acanthocheilonema viteae</i>      | VBB25206              | -H--IR-E YV-L---SA---          |
|                            | <i>Brugia timori</i>                 | VDO42288              | -R--IR-E YV-L---SA---          |
|                            | <i>Brugia pahangi</i>                | VDN84995              | -R--IR-E YV-L---SA---          |
|                            | <i>Loa loa</i>                       | XP_003142184          | -R--IR-E YV-L---SA---          |
|                            | <i>Brugia malayi</i>                 | XP_001896433          | -R--IR-E YV-L---SA---          |
| <i>Anisakis simplex</i>    | VDK20128                             | -R--R-E CV-L---SAR--  |                                |
| <i>Trichuris suis</i>      | KFD58678                             | QH--IR-V H--L--ISDQ-- |                                |
| <i>Trichuris trichiura</i> | CDW58322                             | QH--IR-V D--L--VSDQ-- |                                |
| Outgroups<br>(0/>100)      | <i>Homo sapiens</i>                  | NP_056158             | Q--T-R-D IL-L--VSRN--          |
|                            | <i>Mus musculus</i>                  | NP_080293             | Q--T-R-D IL-L--SRN--           |

**Supplementary Figure 37.** Partial sequence alignments of a CTD nuclear envelope phosphatase 1 homolog protein with a CSI consisting of a 1 aa insertion (shown in black box) that is specific for the *Caenorhabditis* genus and not present in any other nematode species.

|                                  |                                      | 208                                | 248                                         |
|----------------------------------|--------------------------------------|------------------------------------|---------------------------------------------|
| Caenorhabditis<br>(6/6)          | <i>Caenorhabditis elegans</i>        | NP_506895                          | MYIFGGRSDESGQ VGDEHL FHTIHDQYDDTLMALNLATGAW |
|                                  | <i>Caenorhabditis brenneri</i>       | EGT59124                           | -----QM----- --TQ-L-----S--V-               |
|                                  | <i>Caenorhabditis latens</i>         | OZG18972                           | -----HN----- --TQ-L-----T--V-               |
|                                  | <i>Caenorhabditis remanei</i>        | OZF77388                           | -----HN----- --TQ-L-----T--V-               |
|                                  | <i>Caenorhabditis nigoni</i>         | PIC29033                           | -----HN----- --TQ-L---S---D-E-QE-           |
|                                  | <i>Caenorhabditis briggsae</i>       | XP_002637963                       | -----HN----- --TQ-L---S---D-E-QE-           |
| Other Nematodes<br>(0/33)        | <i>Diploscapter pachys</i>           | PAV83173                           | --V-----IT-E --STR-T---R---D-K--L-          |
|                                  | <i>Heligmosomoides polygyrus</i>     | VD086832                           | -----YT-- -SET --STR-M--ER-K--D-R--E-       |
|                                  | <i>Ancylostoma duodenale</i>         | KIH61473                           | -----HT-- --STR-M--ER-K--D-R--E-            |
|                                  | <i>Ancylostoma ceylanicum</i>        | EYB92376                           | -----HT-- --STR-M--ER-K---R--E-             |
|                                  | <i>Strongylus vulgaris</i>           | VDM79853                           | -----HT-- --STR-M--ER-K--D-R--E-            |
|                                  | <i>Dictyocaulus viviparus</i>        | KJH53729                           | -----HT-- --STR-M--ER-K--D-R--E-            |
|                                  | <i>Ancylostoma caninum</i>           | RCN28697                           | -----HT-- --STR-M--ER-K--D-R--E-            |
|                                  | <i>Necator americanus</i>            | XP_013307245                       | -----HT-- --STR-M--ER-K--D-R--E-            |
|                                  | <i>Oesophagostomum dentatum</i>      | KHJ87750                           | -----HT-- --STR-M--ER-K--D-R--E-            |
|                                  | <i>Angiostrongylus costaricensis</i> | VDM62307                           | -----HT-- --STR-M--ER-K--D-R--E-            |
|                                  | <i>Haemonchus contortus</i>          | CDJ94868                           | -----YT-- --STR-M--ER-K--D-R--E-            |
|                                  | <i>Teladorsagia circumcincta</i>     | PI068211                           | -----YT-- --STR-M--ER-K--D-R--E-            |
|                                  | <i>Nippostrongylus brasiliensis</i>  | VDL81029                           | -----YT-- --STR-M--ER-K--D-R--E-            |
|                                  | <i>Haemonchus placei</i>             | VDO35379                           | -----YT-- --STR-M--ER-K--D-R--E-            |
|                                  | <i>Wuchereria bancrofti</i>          | EJW80092                           | -----LH-A --SSR-Y-S-V-KV---K--R-            |
|                                  | <i>Brugia timori</i>                 | VD043970                           | -----LH-A --SSR-Y-S-V-KV---K--R-            |
|                                  | <i>Loa loa</i>                       | XP_003148138                       | -----LQ-A --SSR-Y-S-V-KV---K--R-            |
|                                  | <i>Brugia pahangi</i>                | VDN94587                           | -----LH-A --SSR-Y-S-V-KV---K--R-            |
|                                  | <i>Brugia malayi</i>                 | XP_001895672                       | -----LH-A --SSR-Y-S-V-KV---K--R-            |
|                                  | <i>Litomosoides sigmodontis</i>      | VDK89662                           | -----LH-A --SSR-Y-S-V-KV---K--R-            |
|                                  | <i>Acanthocheilonema viteae</i>      | VBB30887                           | --V-----LH-A --SSR-Y-S-V-KV---K--H-         |
|                                  | <i>Anisakis simplex</i>              | VDK18725                           | -----QL-- --SSR-F-CKR-KV-D-KKFE-            |
|                                  | <i>Toxocara canis</i>                | VDM42343                           | --V-----QL-- --SSR-L-C-R-KV-D-K-TQ-         |
| <i>Trichinella spiralis</i>      | KRY37343                             | --V-----A-P H-SNVER-PTD-FY-D-S-FE- |                                             |
| <i>Trichinella murrelli</i>      | KRX46935                             | --V-----A-P H-SNVER-PTD-FY-D-S-FE- |                                             |
| <i>Trichinella britovi</i>       | KRY52927                             | --V-----A-P H-SNVER-PTD-FY-D-S-FE- |                                             |
| <i>Trichinella patagoniensis</i> | KRY19859                             | --V-----A-P H-SNVER-PTD-FY-D-S-FE- |                                             |
| <i>Trichinella nativa</i>        | OUC43113                             | --V-----A-P H-SNVER-PTD-FY-D-S-FE- |                                             |
| <i>Trichinella nelsoni</i>       | KRX18119                             | --V-----A-P H-SNVER-PTD-FY-D-S-FE- |                                             |
| <i>Trichinella sp. T6</i>        | KRX81102                             | --V-----A-P H-SNVER-PTD-FY-D-S-FE- |                                             |
| <i>Trichinella sp. T8</i>        | KRZ93130                             | --V-----A-P H-SNVER-PTD-FY-D-S-FE- |                                             |
| <i>Trichuris suis</i>            | KHJ46275                             | --V-----P ---NSEL-NTE--Y-DF-DNS-   |                                             |
| <i>Trichuris trichiura</i>       | CDW55263                             | --V-----P ---NSEL-NTE--Y-DFTDNS-   |                                             |
| Outgroups<br>(0/>100)            | <i>Homo sapiens</i>                  | AAH41793                           | --V---A-RF-P --SNNEI-CNRIRVFDTR-E--         |
|                                  | <i>Mus musculus</i>                  | BAB23704                           | --V---A-RF-P --SNNEI-CNRIRVFDTR-E--         |

**Supplementary Figure 38.** Partial sequence alignments of a Kelch-domain protein with a CSI consisting of a 6 aa insertion (shown in black box) that is specific for the *Caenorhabditis* genus and not present in any other nematode species.



|                                      |                                      | 946          | 983                                        |
|--------------------------------------|--------------------------------------|--------------|--------------------------------------------|
| Caenorhabditis<br>homolog 1<br>(0/6) | <i>Caenorhabditis elegans</i>        | NP_741705    | LAEVEGRNFFLERLIDDLKNN                      |
|                                      | <i>Caenorhabditis latens</i>         | OZG22582     | -----K-E-R--                               |
|                                      | <i>Caenorhabditis nigoni</i>         | PIC15211     | -----K-E-R--                               |
|                                      | <i>Caenorhabditis remanei</i>        | POM49663     | -----K-E-R--                               |
|                                      | <i>Caenorhabditis briggsae</i>       | XP_002643265 | -----K-E-R--                               |
|                                      | <i>Caenorhabditis brenneri</i>       | EGT43922     | -----*-----K-E-----                        |
| Caenorhabditis<br>homolog 2<br>(0/6) | <i>Caenorhabditis remanei</i>        | POM51826     | -SDL---VL--KQ-E--NYQ LE DDQRSY-AA-NDK----  |
|                                      | <i>Caenorhabditis latens</i>         | OZG23421     | -SDL---VL--KQ-E--NYQ LE DDQRSY-AA-NDK----  |
|                                      | <i>Caenorhabditis brenneri</i>       | EGT30317     | M-DL---LL--KQVE--NYQ ME -DMRSY-Q--NDK-SS-  |
|                                      | <i>Caenorhabditis nigoni</i>         | PIC18245     | M-DL---LL--KQVE--NYQ ME -DMRTY-Q--NDK-SS-  |
|                                      | <i>Caenorhabditis briggsae</i>       | XP_002644610 | M-DL---LL--KQVE--NYQ ME -DMRTY-Q--NDK-SS-  |
|                                      | <i>Caenorhabditis elegans</i>        | NP_508836    | M-DL---LL--KQ-E--NYQ ME -DMRSY-Q--NDK-TS-  |
| Other<br>Nematodes<br>(0/49)         | <i>Ancylostoma ceylanicum</i>        | EYC23157     | --NL---HI--K--Q--NYQ ID D-SRVTMAH-S-K-DE-  |
|                                      | <i>Ancylostoma caninum</i>           | RCN38944     | --NL---HI--K--Q--NYQ ID D-SRVTMAH-S-K-DE-  |
|                                      | <i>Oesophagostomum dentatum</i>      | KHJ96139     | --NL---HI--K--Q--NYQ ID D-SRVTMAH-S-K-DE-  |
|                                      | <i>Cylicostephanus goldi</i>         | VDN25456     | --NL---HI--K--Q--NYQ IE D-SRVTMAH-S-K-DE-  |
|                                      | <i>Angiostrongylus costaricensis</i> | VDM56448     | --NL---HI--K--Q--NFQ IE D-SRVTMAH-S-K-DE-  |
|                                      | <i>Dictyocaulus viviparus</i>        | KJH42959     | --NL---HI--K--Q--NFQ IE D-SRVTMAH-S-K-DE-  |
|                                      | <i>Necator americanus</i>            | XP_013302480 | --NL---HI--K--Q--NYQ IE D-SRVTMAH-S-K-DE-  |
|                                      | <i>Haemonchus contortus</i>          | CDJ82493     | --NL---HI--K--Q--TYQ IE D-NRVSMAM-S-K-DE-  |
|                                      | <i>Strongyloides ratti</i>           | XP_024507819 | --DL---AL--KQ-E--NYQ IE DDQRSY-AA-N-K-V--  |
|                                      | <i>Diploscapter pachys</i>           | PAV81200     | --DL---AM--KQ-QE-NYQ LE DDQRSY-AA-NDK----  |
|                                      | <i>Dracunculus medinensis</i>        | VDN53013     | --DL---AL--KQ-QE-NYQ LE DDQRSY-AA-ND----   |
|                                      | <i>Nippostrongylus brasiliensis</i>  | VDL80648     | --DL---AL--KQ-QE-NYQ LE DDQRSY-AA-ND----   |
|                                      | <i>Gongylonema pulchrum</i>          | VDN18649     | --DL---SL--KQ-QE-NYQ LE DDQRSY-AA-ND----   |
|                                      | <i>Haemonchus placei</i>             | VD026827     | --DL---AL--KQ-QE-NYQ LE DDQRSY-AA-ND----   |
|                                      | <i>Ancylostoma duodenale</i>         | KIH69140     | --DL---AL--KQ-QE-NYQ LE DDQRSY-AA-ND----   |
|                                      | <i>Teladorsagia circumcincta</i>     | PI076169     | --DL---AL--KQ-QE-NYQ LE DDQRSY-AA-ND----   |
|                                      | <i>Loa loa</i>                       | XP_020304756 | --DL---SL--KQMGE-NYQ LE DDQRSY-AA-ND--S--  |
|                                      | <i>Wuchereria bancrofti</i>          | VDM16573     | --DL---SL--KQMGE-NYQ LE DDQRSY-AA-ND----   |
|                                      | <i>Brugia malayi</i>                 | CRZ23584     | --DL---SL--KQMGE-NYQ LE DDQRSY-AA-ND----   |
|                                      | <i>Onchocerca volvulus</i>           | AAC41561     | --DL---SL--KQMGE-NYQ LE DDQRSY-AA-ND----   |
|                                      | <i>Litomosoides sigmodontis</i>      | VDK86494     | --DL---SL--KQMGE-NYQ LE DDQRSY-AA-ND----   |
|                                      | <i>Onchocerca flexuosa</i>           | OZC09651     | --DL---SL--KQ-QE-NFQ LE DDQRSY-AA-ND----   |
|                                      | <i>Thelazia callipaeda</i>           | VDN06362     | --DL---SL--KQ-QE-NFQ LE DDQRSY-AA-ND----   |
|                                      | <i>Onchocerca ochengi</i>            | VDK87566     | --DL---SL--KQMGE-NYQ LE DDQRSY-AA-ND----   |
|                                      | <i>Setaria digitata</i>              | BAU25821     | --DL---SL--KQMGE-NYQ LE DDQRSY-AA-ND----   |
|                                      | <i>Acanthocheilonema viteae</i>      | VBB27072     | --DL---SL--KQ-QE-NFQ LE DDQRSY-AA-ND----   |
|                                      | <i>Dirofilaria immitis</i>           | AAF37702     | --DL---SL--KQ-QE-NFQ LE DDQRSY-AA-ND----   |
|                                      | <i>Brugia timori</i>                 | VD034026     | --DL---SL--KQ-QE-NFQ LE DDQRSY-AA-ND----   |
|                                      | <i>Anisakis simplex</i>              | VDK61084     | --DL---AL--KQ-QE-NFQ LE DDQRSY-AA-ND----   |
|                                      | <i>Heligmosomoides polygyrus</i>     | VD088828     | -SDL---AL--KQ-QE-NYQ LE DDQRSY-AA-ND----   |
|                                      | <i>Ascaris lumbricoides</i>          | CAA60046     | --DL---AL--KQ-QE-NFQ LE DDQRSY-AA-ND----   |
|                                      | <i>Toxocara canis</i>                | KHN74012     | --DL---AL--KQ-QE-NFQ LE DDQRSY-AA-ND----   |
|                                      | <i>Brugia pahangi</i>                | VDN89362     | --DL---SL--KQ-QE-NFQ LE DDQRSY-AA-ND----   |
|                                      | <i>Enterobius vermicularis</i>       | VDD86780     | --DL---SL--KQTQE-NYQ LE DDQRSY-AA-ND----   |
|                                      | <i>Pristionchus pacificus</i>        | PDM84472     | --DL---AL--KQTQE-NYQ LE DDQRSY-AA-ND--S--  |
|                                      | <i>Trichuris suis</i>                | KFD55367     | --DL-S--SL--KQVQE-TYQ LE DDQRQY-SA-ND----  |
|                                      | <i>Trichuris trichiura</i>           | CDW54395     | --DL-S--SL--KQVQE-TYQ LE DDQRQY-SA-ND----  |
|                                      | <i>Trichinella patagoniensis</i>     | KRY09282     | -GDL-S--SL--KQVQE-TYQ LE DDQRQY-SA-ND--G-- |
|                                      | <i>Trichinella sp. T6</i>            | KRX71243     | -GDL-S--SL--KQVQE-TYQ LE DDQRQY-SA-ND--G-- |
|                                      | <i>Trichinella spiralis</i>          | KRY27589     | -GDL-S--SL--KQVQE-TYQ LE DDQRQY-SA-ND--G-- |
|                                      | <i>Trichinella britovi</i>           | KRY45949     | -GDL-S--SL--KQVQE-TYQ LE DDQRQY-SA-ND--G-- |
|                                      | <i>Trichinella papuae</i>            | KRZ68635     | -GDL-S--SL--KQVQE-TYQ LE DDQRQY-SA-ND--G-- |
|                                      | <i>Trichinella zimbabwensis</i>      | KRZ06996     | -GDL-S--SL--KQVQE-TYQ LE DDQRQY-SA-ND--G-- |
|                                      | <i>Trichinella sp. T9</i>            | KRX53078     | -GDL-S--SL--KQVQE-TYQ LE DDQRQY-SA-ND--G-- |
|                                      | <i>Trichinella murrelli</i>          | KRX38326     | --DL-SK-VM--KQVQE-NHQ LE DDQRQY-MA-ND---L  |
|                                      | <i>Trichinella nelsoni</i>           | KRX15494     | --DL-SK-VM--KQVQE-NHQ LE DDQRQY-MA-ND---L  |
|                                      | <i>Trichinella sp. T8</i>            | KRZ90607     | --DL-SK-VM--KQVQE-NHQ LE DDQRQY-MA-ND---L  |
|                                      | <i>Trichinella nativa</i>            | KRZ52411     | --DL-SK-VM--KQVQE-NHQ LE DDQRQY-MA-ND---L  |
|                                      | <i>Trichinella pseudospiralis</i>    | KRX90006     | --DL-SK-VM--KQVQE-NHQ LE DDQRQY-MA-ND---L  |
| Outgroups<br>(0/>100)                | <i>Homo Sapiens</i>                  | NP_003371    | VDALK-T-ES---QMREEMEE-FA V--ANYQDTIGRLQDE- |
|                                      | <i>Mus musculus</i>                  | NP_001124492 | -ESLR-T-ES---QMREQEER HA R-SASYQEA--RLEEEG |

**Supplementary Figure 39.** Partial sequence alignments of an Intermediate filament protein with a CSI consisting of a 2 aa deletion (shown in black box) that is specific for the *Caenorhabditis* genus and not present in any other nematode species. There are two homologs of this protein in the *Caenorhabditis* species, one of which contains the CSI.

|                                   |                                     | 87                                 |                          | 130                      |                   |
|-----------------------------------|-------------------------------------|------------------------------------|--------------------------|--------------------------|-------------------|
| Rhabditoidea<br>(7/7)             | <i>Caenorhabditis elegans</i>       | NP_001255355                       | YVGNLLWYTTDADLLKALQSTGLA | RS QFADMKFFENRTNGQSKG    |                   |
|                                   | <i>Caenorhabditis nigoni</i>        | PIC32931                           | -I-----IA--S             | -----                    |                   |
|                                   | <i>Caenorhabditis briggsae</i>      | XP_002632965                       | -I-----IA--S             | -----                    |                   |
|                                   | <i>Caenorhabditis remanei</i>       | POM45433                           | -----M--IST--            | -----                    |                   |
|                                   | <i>Caenorhabditis latens</i>        | OZG15436                           | -----M--IST--            | -----                    |                   |
|                                   | <i>Caenorhabditis brenneri</i>      | EGT39303                           | -----M--II--P            | -----                    |                   |
|                                   | <i>Diploscapter pachys</i>          | PAV62065                           | ---MD-F---EY--QQ-RAI--D  | M- SLV---HD--I---R-      |                   |
|                                   | <i>Nippostrongylus brasiliensis</i> | VDL74792                           | -I--V-WA---VALQIK-I--T   | DLI-----                 |                   |
|                                   | <i>Dictyocaulus viviparus</i>       | KJH44095                           | -I--V-WA---VALHIKAI-IT   | DLI-----                 |                   |
|                                   | <i>Pristionchus pacificus</i>       | PDM70858                           | -I--MS-W---D--V-VIT-C-VD | DLV-L--Y---L-----        |                   |
|                                   | <i>Haemonchus contortus</i>         | CDJ96265                           | -I--V-WA---VALHVQQL-IT   | DLI-----                 |                   |
|                                   | <i>Heligmosomoides polygyrus</i>    | VDP39109                           | -I--V-WA---ILHVKAI-V-    | DLI-----                 |                   |
|                                   | <i>Necator americanus</i>           | XP_013296525                       | -I--V-WA---VGLHIKAI-IP   | DLI-----                 |                   |
|                                   | <i>Ancylostoma duodenale</i>        | KIH43897                           | -I--V-WA---VGLHIKAI-IP   | DLI-----                 |                   |
|                                   | <i>Ancylostoma ceylanicum</i>       | EYC08983                           | -I--V-WA---VGLHIKAI-IP   | DLI-----                 |                   |
|                                   | <i>Ancylostoma caninum</i>          | RCN53282                           | -I--V-WA---VGLHIKAI-IP   | DLI-----                 |                   |
|                                   | <i>Oesophagostomum dentatum</i>     | KHJ89953                           | -I--V-WA---VGLHIKAI-IP   | DLI-----                 |                   |
|                                   | <i>Enterobius vermicularis</i>      | VDD90720                           | -I--MT-W---V--QTLIL-C-VS | DLI-I--Y---N-----        |                   |
|                                   | Other<br>Nematodes<br>(1/42)        | <i>Brugia timori</i>               | VDO15610                 | -I--MT-W---V--QTMIL-C-AT | NLI-I--Y---N----- |
| <i>Anisakis simplex</i>           |                                     | VDK46003                           | -I--MT-W---V--QTVIL-C-A- | DLI-L--Y---N-----        |                   |
| <i>Wuchereria bancrofti</i>       |                                     | VDM07655                           | -I--MT-W---V--QTMIL-C-AT | NLI-I--Y---N-----        |                   |
| <i>Brugia malayi</i>              |                                     | CDQ06651                           | -I--MT-W---V--QTMIL-C-AT | NLI-I--Y---N-----        |                   |
| <i>Brugia pahangi</i>             |                                     | VDN82590                           | -I--MT-W---V--QTMIL-C-AT | NLI-I--Y---N-----        |                   |
| <i>Loa loa</i>                    |                                     | XP_020302758                       | -I--MT-W---V--QTMIL-C-AT | NLI-I--Y---N-----        |                   |
| <i>Toxocara canis</i>             |                                     | KHN77344                           | -I--MT-W---V--QTLIL-C-AS | DLI-I--Y---N-----        |                   |
| <i>Onchocerca flexuosa</i>        |                                     | OZC07263                           | -I--MT-W---V--QTMIL-C-AT | NLI-I--Y---N-----        |                   |
| <i>Onchocerca ochengi</i>         |                                     | VDK75787                           | -I--MT-W---V--QTMIL-C-AT | NLI-I--Y---N-----        |                   |
| <i>Thelazia callipaeda</i>        |                                     | VDM99214                           | -I--MT-W---V--QTMIL-C-AT | NLI-I--Y---N-----        |                   |
| <i>Acanthocheilonema viteae</i>   |                                     | VBB30190                           | -I--MT-W---V--QTIIL-C-AT | NLI-I--Y---N-----        |                   |
| <i>Litomosoides sigmodontis</i>   |                                     | VDK74201                           | -I--MT-W---V--QTIIL-C-AT | NLI-I--Y---N-----        |                   |
| <i>Gongyionema pulchrum</i>       |                                     | VDN31613                           | ---MT-W---V--QTMIL-C-AT  | NLI-I--Y---N-----        |                   |
| <i>Dracunculus medinensis</i>     |                                     | VDN55947                           | -I--MT-W---V--QSLIL-V-AT | DLI-I--Y---N---R-        |                   |
| <i>Soboliphyme baturini</i>       |                                     | VDP06154                           | ---T-W---Q--AD-VA-INVT   | DLV-I--Y---A-----        |                   |
| <i>Strongyloides ratti</i>        |                                     | XP_024502417                       | -IS--T-W---D--SEFVIQQ-CE | TPL-I--H-YKN-----        |                   |
| <i>Trichinella patagoniensis</i>  |                                     | KRY14057                           | ---T-W--YF--Q---I-IT     | DLVEVR-N---A-----        |                   |
| <i>Trichinella britovi</i>        |                                     | KRY57026                           | ---T-W--YF--QN---I-IT    | DLVEVR-N---A-----        |                   |
| <i>Trichinella sp. T6</i>         |                                     | KRX77213                           | ---T-W--YF--QN---I-IT    | DLVEVR-N---A-----        |                   |
| <i>Trichinella nelsoni</i>        |                                     | KRX21924                           | ---T-W--YF--QN---I-IT    | DLVEVR-N---A-----        |                   |
| <i>Trichinella spiralis</i>       |                                     | KRY39760                           | ---T-W--YF--QN---I-IT    | DLVEVR-N---A-----        |                   |
| <i>Trichinella murrelli</i>       |                                     | KRX49284                           | ---T-W--YF--QN---I-IT    | DLVEVR-N---A-----        |                   |
| <i>Trichinella papuae</i>         |                                     | KRZ74509                           | ---T-W--YF--QN---I-IT    | DLVEVR-N---A-----        |                   |
| <i>Trichinella pseudospiralis</i> |                                     | KRX86329                           | ---T-W--YF--QN---I-IT    | DLVEVR-N---A-----        |                   |
| <i>Trichinella nativa</i>         |                                     | KRZ57179                           | ---T-W--YF--QN---I-IT    | DLVEVR-N---A-----        |                   |
| <i>Trichinella sp. T9</i>         |                                     | KRX60839                           | ---T-W--YF--QN---I-IT    | DLVEVR-N---A-----        |                   |
| <i>Trichinella zimbabwensis</i>   |                                     | KRZ15665                           | ---T-W--YF--QN---I-IT    | DLVEVR-N---A-----        |                   |
| <i>Trichinella sp. T8</i>         |                                     | KRZ90261                           | ---T-W--YF--QN---I-IT    | DLVEVR-N---A-----        |                   |
| <i>Trichuris trichiura</i>        |                                     | CDW56901                           | PNS--T-W---T-VE--AKMDIR  | DVV-VR-Y---V-----        |                   |
| <i>Trichuris suis</i>             |                                     | KFD73083                           | ---T-W---I-VE--AKMDIR    | DVV-VR-Y---V-----        |                   |
| Outgroups<br>(0/56)               |                                     | <i>Acanthochromis polyacanthus</i> | XP_022052239             | -I--T-W---E--TE-IR-I-IT  | DVLEI-----A-----  |
|                                   |                                     | <i>Acromyrmex echinator</i>        | XP_011056593             | ---T-W-S-Q-ITD-V--I-VT   | D--EV-----A-----  |
|                                   |                                     | <i>Bombus impatiens</i>            | XP_012240732             | ---T-W-S-Q-ITD-V--I-VS   | D-VEV-----A-----  |
|                                   |                                     | <i>Danio rerio</i>                 | XP_005164510             | -I--T-W---E--TD-IR-I-IT  | DVLEI-----A-----  |
|                                   |                                     | <i>Melipona quadrifasciata</i>     | KOX77759                 | ---T-W-S-Q-ITD-V--I-VS   | D-VEV-----A-----  |
|                                   |                                     | <i>Monopterus albus</i>            | XP_020455096             | -I--T-W---E--TE-IL-I-IT  | DVLEI-----A-----  |
|                                   |                                     | <i>Pelecanus crispus</i>           | XP_009492064             | -I--T-W---E--TE-VH-L-VN  | DILEI-----A-----  |
|                                   |                                     | <i>Rhincodon typus</i>             | XP_020384749             | -I--T-W---E--TE--H-M-IT  | DLLEI-----A-----  |
|                                   | <i>Homo sapiens</i>                 | 3P5T_L                             | -I--T-W---E--TE-VH-L-VN  | DILEI-----A-----         |                   |
|                                   | <i>Mus musculus</i>                 | BAC32898                           | -I--T-W---K--TE-VH-L-VN  | DILEI-----A-----         |                   |

**Supplementary Figure 40.** Partial sequence alignments of a Cleavage Factor IM (CFIm) homolog protein with a CSI consisting of a 2 aa insertion (shown in black box) that is specific for the *Rhabditoidea* suborder. The CSI is not present in other nematodes or any non-nematode outgroup.

|                               |                                   |                      | 158                   | 200                    |
|-------------------------------|-----------------------------------|----------------------|-----------------------|------------------------|
| Rhabditoidea<br>(6/6)         | <i>Caenorhabditis elegans</i>     | NP_001021012         | KDKLDVNFIFGLALHDQPLCE | RIPIAHIVEEISSQEKRVLDAK |
|                               | <i>Caenorhabditis remanei</i>     | XP_003114838         | -----GS-MA--H-----    | -V-F-QL-----           |
|                               | <i>Caenorhabditis brenneri</i>    | EGT39543             | -----A-YMA--H----I--  | -V-F-QVGD-VAA-----     |
|                               | <i>Caenorhabditis briggsae</i>    | XP_002640351         | -----AS-MA--H----I--  | -V-IF-SLN---AA-----R   |
|                               | <i>Caenorhabditis nigoni</i>      | PIC52865             | -----ASYMA--H----I--  | -V-IF-SLN---VA-----R   |
|                               | <i>Diploscapter pachys</i>        | PAV72761             | -E--AE-LLLNYDPN--MIQ  | W-DKITLE-D-RA-----     |
| Other<br>Nematodes<br>(0/21)  | <i>Ancylostoma ceylanicum</i>     | EYC21265             | -E--ES-LVLNVNPE---LR  | --SVLP-D-TA--R-----    |
|                               | <i>Ancylostoma duodenale</i>      | KIH64568             | -E--ES-LVLNVNPE---LR  | --SVLP-D--A--R-----    |
|                               | <i>Brugia malayi</i>              | CRZ25463             | -KQ-ESSPSFSTNV---FIQ  | AMSVSEQD-QQ--R---M--   |
|                               | <i>Dictyocaulus viviparus</i>     | KJH53557             | -E--ES-LLLYVNPE---LR  | -VTVLP-D-TN--R-----    |
|                               | <i>Haemonchus contortus</i>       | CDJ84966             | -E--ES-LMLNVNP---ILR  | --TVQP-D-TA--R-----    |
|                               | <i>Loa loa</i>                    | XP_003138092         | -KQ-ES-PSVNTNV---FIQ  | AMSVSEQD-QQ--R---M--   |
|                               | <i>Necator americanus</i>         | XP_013307984         | -E-MES-LLLHINPE---LR  | --SVLP-D-AT--R-----    |
|                               | <i>Oesophagostomum dentatum</i>   | KHJ92924             | -E--ES-LLLNVNPE---LR  | --SV-P-DVTA--R-----    |
|                               | <i>Onchocerca flexuosa</i>        | OZC07137             | -KQ-ES-PSVNTNV---FIQ  | AVSVSEQD-QQ--RL---M--  |
|                               | <i>Pristionchus pacificus</i>     | AAV85979             | GKSIEH-PR-TMDT----IA  | GMVMEDDVKT--R--I----   |
|                               | <i>Teladorsagia circumcincta</i>  | PI061978             | -E--ES-LMLHVNP---ILR  | -VTVQP-D--A--R-----    |
|                               | <i>Toxocara canis</i>             | KHN80387             | -KQ--S-PSVNTNVE---FVQ | AVTVNEQD-QQ--R---M--   |
|                               | <i>Trichinella britovi</i>        | KRY61524             | -KS--S-PGANVNP----FQ  | AVVITEDDVLL-Q---I---R  |
|                               | <i>Trichinella nelsoni</i>        | KRX26031             | -KS--S-PGANVNP----FQ  | AVVITEDDVLL-Q---I---R  |
|                               | <i>Trichinella papuae</i>         | KRZ75498             | -KS--S-PGANVNP----FQ  | AVVITEDDVLL-Q---I---R  |
|                               | <i>Trichinella pseudospiralis</i> | KRY79108             | -KS--S-PGANVNP----FQ  | AVVITEDDVLL-Q---I---R  |
|                               | <i>Trichinella spiralis</i>       | XP_003378007         | -KS--S-PGANVNP----FQ  | AVVITEDDVLL-Q---I---R  |
|                               | <i>Trichinella nativa</i>         | KRZ63363             | -KS--S-PGANVNP----FQ  | AVVITEDDVLL-Q---I---R  |
|                               | <i>Trichuris suis</i>             | KHJ46414             | -KA-ES-PNVNFPN----IQ  | AVMISE-D-IM--R-----R   |
|                               | <i>Trichuris trichiura</i>        | CDW51823             | -KA-ES-PNVNFPN----IQ  | AVMISE-D-MM--R-----R   |
|                               | <i>Wuchereria bancrofti</i>       | EJW76445             | -KQ-ESSPSVSTNV---FIQ  | AMSVSEQD-QQ--R---M--   |
| Outgroups<br>(0/21)           | <i>Acyrtosiphon pisum</i>         | NP_001156167         | RSHY-K E-VYRIP----VQ  | EVSVT--D-K---E--IA---  |
|                               | <i>Agrilus planipennis</i>        | XP_018323606         | RSS--K-PGVFLDPK---VQ  | AVSIQD-D-KR--E--AA--R  |
|                               | <i>Folsomia candida</i>           | XP_021967669         | RTN--N-PGVYINPE---IQ  | A-VVAE-D-R---E---V---  |
|                               | <i>Harpegnathos saltator</i>      | XP_011136314         | -AA-EK-PGVFLNP----VQ  | AVSIAD-DLKR--E--AL---  |
|                               | <i>Ooceraea biroi</i>             | XP_011328960         | -TA-EK-PGVFLNP----VQ  | AVSIAD-D-KR--D--AV---  |
|                               | <i>Priapulid caudatus</i>         | XP_014677085         | -SS--K-PGVYLNPN----MQ | ALMVSE-D-KR--TK--E---  |
| <i>Trachymyrmex cornetzi</i>  | XP_018365156                      | -TA-EK-PGVFLNP----VQ | AVSIAD-D-RR--D--VV--- |                        |
| <i>Trichogramma pretiosum</i> | XP_014222284                      | -AQ-EK-PGSFLNP----LQ | AVTITD-D-KK--EK--A--Q |                        |

**Supplementary Figure 41.** Partial sequence alignments of a Methyl-CpG-binding protein with a CSI consisting of a 2 aa insertion (shown in black box) that is specific for the Rhabditoidea suborder. The CSI is not present in other nematodes or any non-nematode outgroup.

|                                     |                                 | 71                               | AS                  | 105                 |               |
|-------------------------------------|---------------------------------|----------------------------------|---------------------|---------------------|---------------|
| Rhabditoidea<br>(7/7)               | <i>Caenorhabditis elegans</i>   | NP_001024660                     | MLVAPIGYSIRVRALQFDV | TENARTCEKDTLHV      |               |
|                                     | <i>Caenorhabditis brenneri</i>  | EGT30233                         | -----N-----         | -----N-----I        |               |
|                                     | <i>Caenorhabditis latens</i>    | OZG25193                         | -----IH----         | -----N-----         |               |
|                                     | <i>Caenorhabditis remanei</i>   | OZG08426                         | -----IH----         | -----N-----         |               |
|                                     | <i>Caenorhabditis nigoni</i>    | PIC18220                         | -----N----IE--      | -----N--R----       |               |
|                                     | <i>Caenorhabditis briggsae</i>  | CAP33035                         | -----N----IE--      | -R-----N--R----     |               |
|                                     | <i>Diploscapter pachys</i>      | PAV79335                         | --I--V--R--L--IE--  | -G SGGKGS-H-----    |               |
|                                     | <i>Ancylostoma ceylanicum</i>   | EYB97856                         | --I----R--L-V-E--   | NGQNSV-----         |               |
|                                     | <i>Ancylostoma duodenale</i>    | KIH43381                         | --I----R--L-V-E--   | NGQNSV-----         |               |
|                                     | <i>Brugia malayi</i>            | XP_001899277                     | LIT--S--R--L-V-D-N  | LGD-HN-D-----       |               |
|                                     | <i>Dictyocaulus viviparus</i>   | KJH41256                         | --I----R--LKV-D-E-  | NGKNSL-----         |               |
|                                     | <i>Haemonchus contortus</i>     | CDJ85812                         | --I--L--R--LKIIE--  | NG-NSS-----         |               |
|                                     | <i>Loa loa</i>                  | XP_020303780                     | LIT--S--R--L-V-D-N  | LGD-HN-D-----       |               |
|                                     | <i>Necator americanus</i>       | XP_013293602                     | --I----R--L-V-E--   | NGQNSI-----         |               |
|                                     | <i>Oesophagostomum dentatum</i> | KHJ99798                         | --I----R--L-VME--   | NGQKTV-----         |               |
|                                     | Other Nematodes<br>(0/29)       | <i>Onchocerca flexuosa</i>       | OZC09977            | LIM--S--R--L-V-D-N  | LG--HN-D----- |
|                                     |                                 | <i>Teladorsagia circumcincta</i> | PI070590            | --I--L--R--LKV-E--  | NG-NSS-----   |
| <i>Toxocara canis</i>               |                                 | KHN87003                         | LIT--V--R--L-V-D-N  | LGDPQN-D-----       |               |
| <i>Wuchereria bancrofti</i>         |                                 | EJW83984                         | LIT--S--R--L-V-D-N  | LGD-HN-D-----       |               |
| <i>Teladorsagia circumcincta</i>    |                                 | PI070590                         | --I--L--R--LKV-E--  | NG-NSS-----         |               |
| <i>Heligmosomoides polygyrus</i>    |                                 | VDP41706                         | --I----RV--VVE--    | NGRNTS-----         |               |
| <i>Cylicostephanus goldi</i>        |                                 | VDK45323                         | -----R--L-V-E--     | NGQSSN-----         |               |
| <i>Ancylostoma caninum</i>          |                                 | RCN52527                         | --I----R--L-V-E--   | NGQNSV-----         |               |
| <i>Strongylus vulgaris</i>          |                                 | VDM79066                         | --I----R--L-V-E--   | NGQNSN-----         |               |
| <i>Nippostrongylus brasiliensis</i> |                                 | VDL77150                         | -----R--L-VIE--     | NGQNS--             |               |
| <i>Haemonchus placei</i>            |                                 | VD080095                         | --I--L--R--LKIIE--  | NG-NSS-----         |               |
| <i>Angiostrongylus costaricensi</i> |                                 | VDM52576                         | --I----R--LKV-D--   | NGKHTV-----         |               |
| <i>Onchocerca ochengi</i>           |                                 | VDK65250                         | LIT--S--R--L-V-D-N  | LG--HN-D-----       |               |
| <i>Dracunculus medinensis</i>       |                                 | VDN58727                         | LIT----R--L-V-D-N   | LGDPKN-N-----       |               |
| <i>Gongylonema pulchrum</i>         |                                 | VDK29616                         | LIT--V--R--L-V-D--  | LGDSHN-D-----       |               |
| <i>Anisakis simplex</i>             |                                 | VDK46880                         | LIT--V--R--L-V-D-N  | LGDPQN-D-----       |               |
| <i>Litomosoides sigmodontis</i>     |                                 | VDK71987                         | LIA--S--R--L-V-D-N  | LGD-HN-D-----       |               |
| <i>Thelazia callipaeda</i>          |                                 | VDN01074                         | LIT--A--R--L-V-D-N  | LGD-HN-D-----       |               |
| <i>Acanthocheilonema viteae</i>     |                                 | VBB30517                         | LIT--S--R--L-V-D-N  | LGD-HN-D-----       |               |
| <i>Brugia timori</i>                |                                 | VD032583                         | LIT--S--R--L-V-D-N  | LGD-HN-D-----       |               |
| <i>Brugia pahangi</i>               |                                 | VDN90800                         | LIT--S--R--L-V-D-N  | LGD-HN-D-----       |               |
| Outgroups<br>(0/>100)               |                                 | <i>Drosophila melanogaster</i>   | NP_476879           | TIA--DNSYVQLIF-T--I | -SSEN-TF-YVQ- |
|                                     |                                 | <i>Chrysemys picta bellii</i>    | XP_005307507        | L--SER--RVELTFQT-E- | -EEAD-GY-YIEL |
|                                     |                                 | <i>Eurypyga helias</i>           | XP_010159303        | VI--ED--GVELIFQT-EI | -EEAD-GY-YME- |
|                                     |                                 | <i>Gekko japonicus</i>           | XP_015279232        | L---E-HT-NLTFVA-E-  | -RHSS-RW-SVTI |
|                                     |                                 | <i>Papilio xuthus</i>            | XP_013164435        | SI---M-HFVKLTF-T-EL | -PEVN-GY-FVQ- |
|                                     |                                 | <i>Limulus polyphemus</i>        | XP_022247735        | IE-ED-V-V-L-FMT-H-  | -HEQD-GY-YVEI |
|                                     |                                 | <i>Heterocephalus glaber</i>     | XP_004839034        | VI--ED--GVEL-FQT-E- | -EEAD-GY-YMEA |
|                                     |                                 | <i>Exaiptasia pallida</i>        | XP_020911194        | KIASRS-- -KL-FKE--L | -EKF-SY-EVII  |
|                                     |                                 | <i>Homo sapiens</i>              | XP_006527155        | QV---VQ-R-SLQFEA-EL | -GNDV-KY-FVE- |
|                                     |                                 | <i>Mus musculus</i>              | XP_017173690        | QV---VQ-R-SLQFEA-EL | -GNDV-KY-FVE- |
|                                     |                                 | <i>Drosophila biarmipes</i>      | XP_016960768        | TIA--DNSYVQLIF-T--I | -SSEN-TF-YVQ- |
|                                     | <i>Musca domestica</i>          | XP_005182121                     | TIQ--PNSYVNLIF-T--L | -SSEN-TY-YVQ-       |               |
|                                     | <i>Stomoxys calcitrans</i>      | XP_013103389                     | TIQ-SPNSYVQLIF-T--L | -SSEN-TY-YVQ-       |               |
|                                     | <i>Ceratitidis capitata</i>     | XP_004523366                     | TIQ--ASSNVQLLF-T--I | -SSEN-TY-YVQ-       |               |
|                                     | <i>Zeugodacus cucurbitae</i>    | XP_011186021                     | TIQ--ASSNVQLLF-T--I | -ASEN-TY-YVQ-       |               |
|                                     | <i>Sarcophaga bullata</i>       | TMW45646                         | TIQ--PSSNVQLIF-T--L | --SEN-TY-YVQ-       |               |
|                                     | <i>Vanessa tameamea</i>         | XP_026492763                     | SI---V-QFV-LTF-T--L | -PEDN-GY-YVQ-       |               |
|                                     | <i>Amyelois transitella</i>     | XP_013200300                     | SI---P-QFVKLTF-T-EL | -PEAN-GY-YVQ-       |               |
|                                     | <i>Chilo suppressalis</i>       | RVE47431                         | SI----QFV-LTF-T-EL  | -PEAN-GY-YVQ-       |               |
|                                     | <i>Ostrinia furnacalis</i>      | XP_028170358                     | SI---M-QFV-LTF-T-EL | -PEAN-GY-YVQ-       |               |
| <i>Eumeta japonica</i>              | GBP18868                        | SI---L-HFV-LTF-T-EL              | -PEPN-RY-YVQ-       |                     |               |

**Supplementary Figure 42.** Partial sequence alignments of an Abnormal cell migration protein 13 with a CSI consisting of a 1 aa insertion (shown in black box) that is specific for the Rhabditoidea suborder. The CSI is not present in other nematodes or any non-nematode outgroups.

|                                   |                                 | 126                                  | 164                                                   |                        |
|-----------------------------------|---------------------------------|--------------------------------------|-------------------------------------------------------|------------------------|
| Rhabditoidea<br>(6/6)             | <i>Caenorhabditis elegans</i>   | NP_001250840                         | KEEWDPM <del>SLRQTRHLTTFC</del> SLF EKLPNLTEKSKQFNAFL |                        |
|                                   | <i>Caenorhabditis remanei</i>   | OZF79963                             | -----N-A----I-                                        |                        |
|                                   | <i>Caenorhabditis latens</i>    | OZG18420                             | -----KN-A----I-                                       |                        |
|                                   | <i>Caenorhabditis briggsae</i>  | CAP31469                             | -----N-A-C--I-                                        |                        |
|                                   | <i>Caenorhabditis brenneri</i>  | EGT32791                             | -D-----KK-AM---I-                                     |                        |
|                                   | <i>Diploscapter pachys</i>      | PAV85955                             | TT----L--S--NR-AQILNDL                                |                        |
|                                   | <i>Pristionchus pacificus</i>   | PDM66686                             | SD--E-V--T-STRIS-LIRTL                                |                        |
|                                   | <i>Ancylostoma ceylanicum</i>   | EYB89229                             | NV--E----K-SQR-GAVL-GL                                |                        |
|                                   | <i>Ancylostoma duodenale</i>    | KIH55911                             | NV--E----K-SQR-GAVL-GL                                |                        |
|                                   | <i>Ascaris suum</i>             | ERG87385                             | Q-Q---L-QK-CSR-GFLL-SL                                |                        |
|                                   | <i>Brugia malayi</i>            | XP_001893893                         | R-R---L-QH-C-N-GFLLNQL                                |                        |
|                                   | <i>Dictyocaulus viviparus</i>   | KJH47162                             | NV--E----K-SKR-GAVLCGL                                |                        |
|                                   | <i>Haemonchus contortus</i>     | CDJ93966                             | NV--E----K-SKR-GAVL-GL                                |                        |
|                                   | <i>Necator americanus</i>       | XP_013298932                         | NV--E----K-SQR-GAVL-GL                                |                        |
|                                   | <i>Oesophagostomum dentatum</i> | KHJ88487                             | NV--E----K-SKR-GAVL-GL                                |                        |
|                                   | Other Nematodes<br>(0/30)       | <i>Toxocara canis</i>                | KHN84480                                              | Q-Q---L-QK-CSR-GFLLDSL |
| <i>Wuchereria bancrofti</i>       |                                 | EJW84293                             | R-R---L-QQ-C-N-GFLLDQL                                |                        |
| <i>Enterobius vermicularis</i>    |                                 | VDD94889                             | -R---L-EK-CKR-GFLLDSL                                 |                        |
| <i>Brugia pahangi</i>             |                                 | VDN84991                             | -R---L-QH-C-N-GFLLNQL                                 |                        |
| <i>Brugia timori</i>              |                                 | VD028846                             | ---L-QH-C-N-GFLLNQL                                   |                        |
| <i>Onchocerca flexuosa</i>        |                                 | VD064826                             | -R---L-QH-CQN-GFLLNQL                                 |                        |
| <i>Onchocerca ochengi</i>         |                                 | VDK64967                             | ---L-QH-C-N-GFLLNQL                                   |                        |
| <i>Litomosoides sigmodontis</i>   |                                 | VDK71787                             | ---L-QH-C-N-GFLL-QL                                   |                        |
| <i>Acanthocheilonema viteae</i>   |                                 | VBB26053                             | -R---L-QH-C-N-GFLL-QL                                 |                        |
| <i>Gongylonema pulchrum</i>       |                                 | VDN36303                             | -R---L-Q-HC-N-ALLLNQL                                 |                        |
| <i>Loa loa</i>                    |                                 | XP_020302321                         | ---L-QH-C-N-GFLLNQL                                   |                        |
| <i>Trichinella britovi</i>        |                                 | KRY50355                             | NKV---T-GK--R-VD-LDNL                                 |                        |
| <i>Trichinella murrelli</i>       |                                 | KRX42937                             | NKV---T-GK--R-VD-LDNL                                 |                        |
| <i>Trichinella nativa</i>         |                                 | KRZ54145                             | NKV---T-GK--R-VD-LDNL                                 |                        |
| <i>Trichinella nelsoni</i>        |                                 | KRX20309                             | NKV---T-GK--R-VD-LDNL                                 |                        |
| <i>Trichinella papuae</i>         |                                 | KRZ76140                             | NKV---T-GK--R-VD-LDNL                                 |                        |
| <i>Trichinella pseudospiralis</i> |                                 | KRZ30430                             | NKV---T-GK--R-VH-LDNL                                 |                        |
| <i>Trichinella spiralis</i>       |                                 | XP_003379916                         | NKV---T-GK--R-VD-LDNL                                 |                        |
| <i>Trichinella zimbabwensis</i>   |                                 | KRZ05150                             | NKV---T-GK--R-VH-LDNL                                 |                        |
| <i>Trichuris suis</i>             |                                 | KHJ43583                             | -KV-R-A-SS--EL-CS-LRHL                                |                        |
| <i>Trichuris trichiura</i>        |                                 | CDW52567                             | -KV-R-A-SS--EL-C--LRHL                                |                        |
| Outgroups<br>(0/>100)             |                                 | <i>Acanthaster planci</i>            | XP_022100458                                          | --V---V-ST--NR-VSLIHKL |
|                                   |                                 | <i>Acromyrmex echinator</i>          | XP_011056917                                          | EKI-----TS--LR-VGTINRL |
|                                   |                                 | <i>Aedes aegypti</i>                 | XP_021709601                                          | EQV---L-TT--LK-VRLINRL |
|                                   |                                 | <i>Microtus ochrogaster</i>          | XP_005364761                                          | EFI---L-AS--S--VH-R-V  |
|                                   |                                 | <i>Rattus norvegicus</i>             | XP_006236765                                          | EMI---L-TS---I--VH-RVA |
|                                   |                                 | <i>Strongylocentrotus purpuratus</i> | XP_011664408                                          | E-V-----TL--HR-IDTLHQL |
|                                   |                                 | <i>Drosophila ananassae</i>          | XP_001953199                                          | T-S---L-TT--LR-VG-INRL |
|                                   |                                 | <i>Homo sapiens</i>                  | NP_057715                                             | ENM---F-TT--SRMVGITLKL |
| <i>Mus musculus</i>               |                                 | XP_011239693                         | ETI---L-TS---S--VH-RVA                                |                        |

**Supplementary Figure 43.** Partial sequence alignments of a PAX3- and PAX7 binding protein 1 protein with a CSI consisting of a 1 aa in (shown in black box) that is specific for the Rhabditoidea suborder. The CSI is not present in other nematodes or any non-nematode outgroup.

|                               |                                      | 234                         | 270                    |                       |
|-------------------------------|--------------------------------------|-----------------------------|------------------------|-----------------------|
| Chromadorea<br>(28/30)        | <i>Oesophagostomum dentatum</i>      | KHJ83757                    | LLTINETTGEQAKPAVLKDFD  |                       |
|                               | <i>Pristionchus pacificus</i>        | PDM73700                    | - ISL-----IPNIRG-P     |                       |
|                               | <i>Ancylostoma ceylanicum</i>        | EYC21828                    | --S-----K-Q---         |                       |
|                               | <i>Haemonchus contortus</i>          | CDJ92987                    | --S-----L-REK-E---     |                       |
|                               | <i>Dictyocaulus viviparus</i>        | KJH51495                    | - ISL-----S-----       |                       |
|                               | <i>Diploscapter pachys</i>           | PAV75305                    | -VEL-----I-R--N        |                       |
|                               | <i>Caenorhabditis brenneri</i>       | EGT55552                    | - ISL---V--T----R--N   |                       |
|                               | <i>Caenorhabditis remanei</i>        | XP_003101477                | - IAL---V--T----R--N   |                       |
|                               | <i>Caenorhabditis elegans</i>        | NP_001021339                | - ISL---V--T---L-R--N  |                       |
|                               | <i>Caenorhabditis briggsae</i>       | CAP28989                    | - ISL---V--T----R--N   |                       |
|                               | <i>Caenorhabditis latens</i>         | OZG13909                    | - IAL---V--T----R--N   |                       |
|                               | <i>Caenorhabditis nigoni</i>         | PIC27080                    | - ISL---V--T----R--N   |                       |
|                               | <i>Ascaris suum</i>                  | ERG81007                    | -ASL-----PNIRG--       |                       |
|                               | <i>Toxocara canis</i>                | KHN74907                    | -ASL-----PNIRG-V       |                       |
|                               | <i>Brugia malayi</i>                 | CDQ04118                    | -A-L-----PNIRG-S       |                       |
|                               | <i>Loa loa</i>                       | XP_003144956                | -A-L-----PNIRG-S       |                       |
|                               | <i>Onchocerca flexuosa</i>           | OZC08312                    | -AAL-----PNIRG-S       |                       |
|                               | <i>Litomosoides sigmodontis</i>      | VDK69424                    | -A-L-----PNIRG-S       |                       |
|                               | <i>Ancylostoma caninum</i>           | RCN31337                    | --S-----L--K--Q---     |                       |
|                               | <i>Cylicostephanus goldi</i>         | VDK84008                    | --S-----N-----         |                       |
|                               | <i>Haemonchus placei</i>             | VD041434                    | --S-----L-REK-E---     |                       |
|                               | <i>Heligmosomoides polygyrus</i>     | VD094671                    | --S-----L-REK-Q---     |                       |
|                               | <i>Angiostrongylus costaricensis</i> | VDM53442                    | - ISV-----S-----       |                       |
|                               | <i>Brugia pahangi</i>                | VDN86328                    | -A-L-----PNIRG-S       |                       |
|                               | <i>Onchocerca ochengi</i>            | VDM94527                    | -A-L-----PNIRG-S       |                       |
|                               | <i>Acanthocheilonema viteae</i>      | VBB27020                    | -V-L-----PNIRG-S       |                       |
|                               | <i>Anisakis simplex</i>              | VDK66445                    | -ASL-----PNIRG-P       |                       |
|                               | <i>Thelazia callipaeda</i>           | VDN01689                    | -ASL-----PNIRG-S       |                       |
|                               | <i>Strongyloides ratti</i>           | CEF66832                    | -IK-----C--PIFRGGN     |                       |
|                               | <i>Wuchereria bancrofti</i>          | EJW86797                    | -TAR-QS-I-SFR-P-FIYGI  |                       |
|                               | Outgroups<br>(0/62)                  | <i>Amyelois transitella</i> | XP_013186177           | -VMN-R--L-AFRAPMFRGGA |
|                               |                                      | <i>Amborella trichopoda</i> | XP_020522962           | -IST-Q--Y-NFR YRY-R R |
|                               |                                      | <i>Hydra vulgaris</i>       | XP_012562211           | --SK-R--L-SFRAPLFHYGA |
| <i>Theileria equi</i>         |                                      | XP_004830431                | -IS--K--I-FCE WKAS G   |                       |
| <i>Zea mays</i>               |                                      | ONM56237                    | -MST-Q--Y-NFR YRY -R R |                       |
| <i>Fonticula alba</i>         |                                      | XP_009496369                | -IAR-R--FD FSYFYHIYKE  |                       |
| <i>Papilio xuthus</i>         |                                      | XP_013166240                | -VAH-R--L-AFRAPMFRGGA  |                       |
| <i>Opisthorchis viverrini</i> | XP_009163389                         | -VMK-KL-L-FHR-PIFRDAS       |                        |                       |
|                               |                                      |                             | KADYNMGMNFKQVF         |                       |
|                               |                                      |                             | --N-DV-RWK-IEI--       |                       |
|                               |                                      |                             | -----L--K--Q---        |                       |
|                               |                                      |                             | -----L-REK-E---        |                       |
|                               |                                      |                             | -----L--EK--L---       |                       |
|                               |                                      |                             | M-----RAA-L-KI-        |                       |
|                               |                                      |                             | A-----W--RA--          |                       |
|                               |                                      |                             | A-----W--RS--          |                       |
|                               |                                      |                             | A-----Y--QS--          |                       |
|                               |                                      |                             | A-----W--RA--          |                       |
|                               |                                      |                             | A-----W--RS--          |                       |
|                               |                                      |                             | A-----W--RA--          |                       |
|                               |                                      |                             | -----TYR-LRAA-         |                       |
|                               |                                      |                             | -----TYR-LRAA-         |                       |
|                               |                                      |                             | N-----IYR-LRA--        |                       |
|                               |                                      |                             | N-----TYR-LRA--        |                       |
|                               |                                      |                             | N-----TYR-LRA--        |                       |
|                               |                                      |                             | S---V-TYR-LRA--        |                       |
|                               |                                      |                             | -----L--K--Q---        |                       |
|                               |                                      |                             | -----RR--Q---          |                       |
|                               |                                      |                             | -----L-REK-E---        |                       |
|                               |                                      |                             | -----L-REK-Q---        |                       |
|                               |                                      |                             | -----L-RAK--M---       |                       |
|                               |                                      |                             | N-----IYR-LRA--        |                       |
|                               |                                      |                             | N-----TYR-LRA--        |                       |
|                               |                                      |                             | N---V-TYR-LRA--        |                       |
|                               |                                      |                             | -----TYR-LRAA-         |                       |
|                               |                                      |                             | N-----AYR-LRA--        |                       |
|                               |                                      |                             | I N-T--TTVKE-IRSAL     |                       |
|                               |                                      |                             | D -NGF-L-IRR--R---     |                       |
|                               |                                      |                             | D -NGFSL-AY---E---     |                       |
|                               |                                      |                             | R ANP--L-VV---EI-      |                       |
|                               |                                      |                             | D -DGF-I-T---IR---     |                       |
|                               |                                      |                             | G SYN--L-IIS-----      |                       |
|                               |                                      |                             | R ANP--I-IL---MEI-     |                       |
|                               |                                      |                             | L YDQ----PRG--A-I-     |                       |
|                               |                                      |                             | D -NGFSL-AF---E---     |                       |
|                               |                                      |                             | R RDSFDL-VKQ-MA---     |                       |

**Supplementary Figure 44.** Partial sequence alignments of a Palmitoyltransferase protein with a CSI consisting of a 1 aa deletion (shown in black box) that is specific for the Chromadorea class. The CSI is not present in any non-nematode outgroup. The CSI is not present in the species *Strongyloides ratti* and *Wuchereria bancrofti*. Blastp search shows no homologs of this protein present in species of the Enoplea class.

|                                 |                                   | 255                              | 282                              |
|---------------------------------|-----------------------------------|----------------------------------|----------------------------------|
| Chromadorea<br>(20/20)          | <i>Oesophagostomum dentatum</i>   | KHJ83757                         | KADYNGMGMNFKQVFG WGLWLFPLITS     |
|                                 | <i>Ancylostoma ceylanicum</i>     | EYC21828                         | ----L--K--Q---- -----N--         |
|                                 | <i>Haemonchus contortus</i>       | CDJ92987                         | ----L-REK--E---- -----K--        |
|                                 | <i>Dictyocaulus viviparus</i>     | KJH51495                         | ----L-EK--L---- -----R-T         |
|                                 | <i>Diploscapter pachys</i>        | PAV75305                         | M-----RAA-L-KI-- -----V--P-D     |
|                                 | <i>Caenorhabditis brenneri</i>    | EGT55552                         | A-----W--RA--- ----MW-IESN       |
|                                 | <i>Caenorhabditis remanei</i>     | XP_003101477                     | A-----W--RS--- ----MW-IESN       |
|                                 | <i>Caenorhabditis elegans</i>     | NP_001021339                     | A-----Y--QS--- -----C-IDS-       |
|                                 | <i>Caenorhabditis briggsae</i>    | CAP28989                         | A-----W--RA--- --V-MW-IESN       |
|                                 | <i>Caenorhabditis latens</i>      | OZG13909                         | A-----W--RS--- ----MW-IESN       |
|                                 | <i>Ascaris suum</i>               | ERG81007                         | -----TYR-LRAA-- -----VS-H        |
|                                 | <i>Toxocara canis</i>             | KHN74907                         | -----TYR-LRAA-- -----VS-H        |
|                                 | <i>Brugia malayi</i>              | CDQ04118                         | N-----IYR-LRA--- ----A--VDSH     |
|                                 | <i>Loa loa</i>                    | XP_003144956                     | N-----TYR-LRA--- ----A--V        |
|                                 | <i>Onchocerca flexuosa</i>        | OZC08312                         | N-----TYR-LRA--- ----A--VDSH     |
|                                 | <i>Pristionchus pacificus</i>     | PDM73700                         | --N-DV-RWK-IEI--- -----VR-T      |
|                                 | <i>Strongyloides ratti</i>        | CEF66832                         | N-T--TTVKE-IRSAL- -----VD-E      |
| <i>Wuchereria bancrofti</i>     | EJW75594                          | --IYR-LRA--- ----A--VDSH         |                                  |
| Other<br>Nematodes<br>(0/12)    | <i>Trichuris suis</i>             | KFD53008                         | -NGF-Y-TLR--QE--- KR LL--FL-VY-- |
|                                 | <i>Trichuris trichiura</i>        | CDW56012                         | -NGF-Y-TLR--QE--- KR PL--FL-VY-  |
|                                 | <i>Trichinella nelsoni</i>        | KRX27745                         | -EGF-L-TTR--REI-- DS PFY--I-VFS- |
|                                 | <i>Trichinella spiralis</i>       | KRY42951                         | -EGF-L-TTR--REI-- DS PFY--I-VFS- |
|                                 | <i>Trichinella patagoniensis</i>  | KRY17610                         | -EGF-L-TTR--REI-- DS PFY--I-VFS- |
|                                 | <i>Trichinella sp. T9</i>         | KRX64942                         | -EGF-L-TTR--REI-- DS PFY--I-VFS- |
|                                 | <i>Trichinella murrelli</i>       | KRX48841                         | -EGF-L-TTR--REI-- DS PFY--I-VFS- |
|                                 | <i>Trichinella nativa</i>         | KRZ58482                         | -EGF-L-TTR--REI-- DS PFY--I-VFS- |
|                                 | <i>Trichinella papuae</i>         | KRZ81046                         | -EGF-L-MSR--REI-- DS PFY--I-VFS- |
|                                 | <i>Trichinella pseudospiralis</i> | KRY00051                         | -EGF-L-MSR--REI-- DS PFY--I-VFS- |
| <i>Trichinella zimbabwensis</i> | KRZ19084                          | -EGF-L-MSR--REI-- DS PFY--I-VFS- |                                  |
| <i>Soboliphyme baturini</i>     | VDP43282                          | -DGF-L-VRK--VE--- KN KVT-IL-IF-- |                                  |
| Outgroups<br>(0/62)             | <i>Aedes aegypti</i>              | XP_021697678                     | -NGFSL--L---QE--- DD RK--FV-VY-- |
|                                 | <i>Hydra vulgaris</i>             | XP_012562211                     | -DGF-I-T--IR---- NT TWK-F--IF-T  |
|                                 | <i>Papilio xuthus</i>             | XP_013166236                     | -NGFSL-AF---E--- NS PN--ML-VF--  |
|                                 | <i>Sarcophilus harrisii</i>       | XP_012408785                     | -NGF-L-FIR--Q---- EN KK---L-IGS- |
|                                 | <i>Gossypium raimondii</i>        | XP_012480671                     | YDLGRKK --E---- TK KS-----FS     |
|                                 | <i>Drosophila melanogaster</i>    | NP_724868.2                      | -NG--L-RYA--CE--- DD -QY-FL-VFS- |
|                                 | <i>Danio rerio</i>                | XP_021331799                     | SKAFDV-VQA--L---- KK KR-----VFS- |
| <i>Stomoxys calcitrans</i>      | XP_013106168                      | -NGF-L--FA--QE--- DN -K--FL-IYS- |                                  |

**Supplementary Figure 45.** Partial sequence alignments of a Palmitoyltransferase protein with a CSI consisting of a 2 aa deletion (shown in black box) that is specific for the Chromadorea class. The CSI is not present in any non-nematode outgroup.

|                             |                                      | 162           | PHM              | 194                  |
|-----------------------------|--------------------------------------|---------------|------------------|----------------------|
| Chromadorea<br>(33/33)      | <i>Caenorhabditis brenneri</i>       | EGT30700      | AGLLGSFSYAFLTE   | ANLTPKVALLIQLFIP     |
|                             | <i>Caenorhabditis briggsae</i>       | CAP22728      | -----            | -----                |
|                             | <i>Caenorhabditis elegans</i>        | NP_505237     | -----            | -----                |
|                             | <i>Caenorhabditis latens</i>         | OZF90828      | -----            | -----                |
|                             | <i>Caenorhabditis nigoni</i>         | PIC22854      | -----            | -----                |
|                             | <i>Caenorhabditis remanei</i>        | OZF85401      | -----            | -----                |
|                             | <i>Ancylostoma ceylanicum</i>        | EYG10320      | -----D           | RS- -D-Q-----        |
|                             | <i>Ancylostoma duodenale</i>         | KIH62876      | -----D           | RS- -D-Q-----        |
|                             | <i>Brugia malayi</i>                 | XP_001901223  | --II--LT--A--    | --F L--S-RIT--M-VV-  |
|                             | <i>Dictyocaulus viviparus</i>        | KJH42909      | -----LA-----     | KS- -----D-V-L----   |
|                             | <i>Diploscapter pachys</i>           | PAV60708      | --I-----L---     | -K- G--S--TT-----    |
|                             | <i>Necator americanus</i>            | XP_013296815  | --VV-A--G--D     | RQL LA-S-TE-M-VM-VV- |
|                             | <i>Strongyloides ratti</i>           | CEF68195      | --V--A--G--      | -NW ---S--N-C-VMQI-- |
|                             | <i>Haemonchus contortus</i>          | CDJ95123      | --I-----         | RT- G--Q--D-----     |
|                             | <i>Loa loa</i>                       | XP_020304569  | --IF--A--I--D    | M-- LG---QN---LM-IV- |
|                             | <i>Oesophagostomum dentatum</i>      | KHJ93977      | -----D           | RS- G--Q-----V-      |
|                             | <i>Onchocerca flexuosa</i>           | OZC12673      | --II-ALA-V---    | --F L--S--TT--M-IV-  |
|                             | <i>Pristionchus pacificus</i>        | PDM69720      | --VF-ALA-S--D    | AA- -----Q---TM-VV-  |
|                             | <i>Teladorsagia circumcincta</i>     | PI076278      | --I-----L---     | -S- G--Q-----        |
|                             | <i>Toxocara canis</i>                | KHN85722      | --V--A-T--A--D   | S-- LAMS-RT---TM---- |
|                             | <i>Wuchereria bancrofti</i>          | EJW86032      | --II--LT--A--    | --F L--S-RIT--M-VV-  |
|                             | <i>Nippostrongylus brasiliensis</i>  | VDL62951      | -----D           | KS- G--S-----        |
|                             | <i>Ancylostoma caninum</i>           | RCN29588      | -----D           | RS- -D-Q-----        |
|                             | <i>Heligmosomoides polygyrus</i>     | VDO71568      | --I-----D        | -AI G--Q-----V-      |
|                             | <i>Haemonchus placei</i>             | VDO66999      | --I-----         | RT- G--Q--D-----     |
|                             | <i>Brugia timori</i>                 | VDO29491      | --II--LT--A--    | --F L--S-RIT--M-VV-  |
|                             | <i>Brugia pahangi</i>                | VDN82008      | --II--LT--A--    | --F L--S-RIT--M-VV-  |
|                             | <i>Acanthocheilonema viteae</i>      | VBB29710      | --IF--A--M--D    | M-- LG---QN---LM-IV- |
|                             | <i>Enterobius vermicularis</i>       | VDD87126      | -SIF--LI--G--    | --F -H-S--N---LM-C-- |
|                             | <i>Litomosoides sigmodontis</i>      | VDK87641      | --IF--A--I--D    | MS- LG---QK---VM-IV- |
|                             | <i>Strongylus vulgaris</i>           | VDM81356      | --V-----G--D     | RNL LG---AQ-M-VM-VV- |
|                             | <i>Angiostrongylus costaricensis</i> | VDM52847      | --A-T---VM-D     | VNL LA---TD-M-VM-VV- |
|                             | <i>Thelazia callipaeda</i>           | VDN08382      | --IF--T--L--D    | KR- LG-L-QNT--TM-I-- |
| Outgroups<br>(0/>200)       | <i>Acanthaster planci</i>            | XP_022105346  | S--VS-LT--G-A-   | V-G-EKS--VMVVV-      |
|                             | <i>Acinonyx jubatus</i>              | XP_014917735  | -----AL--LG--Q   | -G-S-QHT--SM-G--     |
|                             | <i>Acromyrmex echinatior</i>         | XP_011053297  | --VI-AV--G--L    | V-SIENT--VM-IV-      |
|                             | <i>Acropora digitifera</i>           | XP_015763073  | ---F-AL--G--S    | -GMS-RK-V-VMNV--     |
|                             | <i>Homo sapiens</i>                  | AAD01558      | -----AL--LG--Q   | -G-S-QQT--SM-G--     |
|                             | <i>Mus musculus</i>                  | AAH47120      | -----L--LG--Q    | -G-S-QHT--SM-G--     |
|                             | <i>Callithrix jacchus</i>            | XP_017834325  | -----AL--LG--Q   | -G-S-QHT--SM-G--     |
|                             | <i>Thamnophis sirtalis</i>           | XP_013931658  | ---I-AL--LG--Q   | IG-S-QDT--FMTIV-     |
| <i>Octopus bimaculoides</i> | XP_014786536                         | --IF-AL--G--M | L--S-RHTI-VM-I-- |                      |

**Supplementary Figure 46.** Partial sequence alignments of a Battenin protein with a CSI consisting of a 3 aa insertion (shown in black box) that is specific for the Chromadorea class. The CSI is not present in any other nematode species or non-nematode outgroup.



|                                     |                                      | 122                       | 155                        |
|-------------------------------------|--------------------------------------|---------------------------|----------------------------|
| Chromadorea<br>homolog 1<br>(33/33) | <i>Dictyocaulus viviparus</i>        | KJH47557                  | GQIQLWQFLLELLADA           |
|                                     | <i>Haemonchus contortus</i>          | CDJ98481                  | -----A-----                |
|                                     | <i>Ancylostoma ceylanicum</i>        | EYC19665                  | -----G-----                |
|                                     | <i>Ancylostoma duodenale</i>         | KIH51654                  | -----G-----                |
|                                     | <i>Necator americanus</i>            | XP_013309383              | -----G-----                |
|                                     | <i>Oesophagostomum dentatum</i>      | KHJ79766                  | -----G-----                |
|                                     | <i>Haemonchus placei</i>             | VD042951                  | -----A-----                |
|                                     | <i>Heligmosomoides polygyrus</i>     | VD088533                  | -----G-----                |
|                                     | <i>Angiostrongylus costaricensis</i> | VDM63452                  | -----G-----                |
|                                     | <i>Brugia malayi</i>                 | CRZ25787                  | -----S-T H                 |
|                                     | <i>Diploscapter pachys</i>           | PAV55673                  | -----EG S                  |
|                                     | <i>Loa loa</i>                       | XP_020301541              | -----S-T H                 |
|                                     | <i>Onchocerca flexuosa</i>           | OZC06734                  | -----S-T H                 |
|                                     | <i>Teladorsagia circumcincta</i>     | PIO60565                  | -----G-----                |
|                                     | <i>Toxocara canis</i>                | KHN83764                  | -----S-- H                 |
|                                     | <i>Wuchereria bancrofti</i>          | EJW86656                  | -----S-T H                 |
|                                     | <i>Acanthocheilonema viteae</i>      | VBB28050                  | -----T H                   |
|                                     | <i>Thelazia callipaeda</i>           | VDM95915                  | -----S-T H                 |
|                                     | <i>Gongylonema pulchrum</i>          | VDK27269                  | -----S-T H                 |
|                                     | <i>Litomosoides sigmodontis</i>      | VDK82646                  | -----S-T H                 |
|                                     | <i>Brugia pahangi</i>                | VDN92405                  | -----S-T H                 |
|                                     | <i>Brugia timori</i>                 | VD008037                  | -----S-T H                 |
|                                     | <i>Onchocerca ochengi</i>            | VDK80025                  | -----S-T H                 |
|                                     | <i>Anisakis simplex</i>              | VDK48258                  | -----S-- H                 |
|                                     | <i>Dracunculus medinensis</i>        | VDN58716                  | -----S-S Q                 |
|                                     | <i>Caenorhabditis latens</i>         | OZG24979                  | -TVH---IR---DQP K          |
|                                     | <i>Caenorhabditis remanei</i>        | OZG07314                  | -TVH---IR---DQP K          |
|                                     | <i>Caenorhabditis nigoni</i>         | PIC18783                  | -TVH---IR---DQP K          |
|                                     | <i>Caenorhabditis briggsae</i>       | XP_002644898              | -TVH---IR---DQP K          |
|                                     | <i>Caenorhabditis elegans</i>        | NP_001123137              | -TVH---IR---DQP K          |
|                                     | <i>Caenorhabditis brenneri</i>       | EGT43113                  | -TVH---IR---DQP K          |
|                                     | <i>Strongyloides ratti</i>           | XP_024499015              | -----I---GND H             |
|                                     | <i>Enterobius vermicularis</i>       | VDD96228                  | -TVH--H-IR---DQP K         |
| Chromadorea<br>homolog 2<br>(0/10)  | <i>Strongyloides ratti</i>           | CEF71270                  | -----S-S R                 |
|                                     | <i>Nippostrongylus brasiliensis</i>  | VDL85697                  | --T-----K RYDDV-T---TQ---- |
|                                     | <i>Enterobius vermicularis</i>       | VDD92848                  | -----S-S C--DV-T---T-----  |
|                                     | <i>Caenorhabditis brenneri</i>       | EGT30352                  | -----V-----N-----          |
|                                     | <i>Caenorhabditis elegans</i>        | NP_001263956              | -----V-----N-----          |
|                                     | <i>Caenorhabditis latens</i>         | OZG25316                  | -----V-----N-----          |
|                                     | <i>Caenorhabditis remanei</i>        | OZG07579                  | -----V-----N-----          |
|                                     | <i>Caenorhabditis nigoni</i>         | PIC18295                  | -----V-ST-----N-----       |
|                                     | <i>Caenorhabditis briggsae</i>       | XP_002644635              | -----V-ST--T---N-----      |
|                                     | Enoplea<br>(0/14)                    | <i>Trichinella nativa</i> | OUC48995                   |
| <i>Trichinella sp. T6</i>           |                                      | KRX74809                  | -----S-G R-ME--T---TN----  |
| <i>Trichinella patagoniensis</i>    |                                      | KRY11413                  | -----S-G R-ME--T---TN----  |
| <i>Trichinella nelsoni</i>          |                                      | KRX14286                  | -----S-G R-ME--T---TN----  |
| <i>Trichinella pseudospiralis</i>   |                                      | KRX92484                  | -----S-G R-ME--T---TN----  |
| <i>Trichinella zimbabwensis</i>     |                                      | KRZ13603                  | -----S-G R-ME--T---TN----  |
| <i>Trichinella papuae</i>           |                                      | KRZ73610                  | -----S-G R-ME--T---TN----  |
| <i>Trichinella spiralis</i>         |                                      | XP_003368363              | -----S-N ---AF-T---IN----  |
| <i>Trichinella britovi</i>          |                                      | KRY57928                  | -----S-N ---AF-T---IN----  |
| <i>Trichinella murrelli</i>         |                                      | KRX47624                  | -----S-N ---AF-T---IN----  |
| <i>Trichuris suis</i>               |                                      | KFD53731                  | -----S-G R-ME--T---TN----  |
| <i>Trichuris trichiura</i>          |                                      | CDW56634                  | -----S-N A--SF-----MN----- |
| <i>Soboliphyme baturini</i>         |                                      | VD094732                  | -----S-S A-SAF-----TN----  |
| <i>Acanthisitta chloris</i>         |                                      | XP_009078900              | -----S-S ---S--T---TN---M  |
| Outgroups<br>(0/>200)               | <i>Aedes aegypti</i>                 | XP_021712753              | -----S-S A--A--T---TN----  |
|                                     | <i>Aethina tumida</i>                | XP_019876307              | -----S-S ---A--T---TN----  |
|                                     | <i>Alligator mississippiensis</i>    | KY039391                  | -----S-R A-L-----AN-----   |
|                                     | <i>Camelus bactrianus</i>            | XP_010947219              | -----R A--G-----GH-----    |
|                                     | <i>Octopus bimaculoides</i>          | KOF74414                  | -----S-T G-SN--T---TN----  |
|                                     | <i>Sorex araneus</i>                 | XP_004617195              | -----R A--G-----GH-----    |
|                                     | <i>Mus musculus</i>                  | BAC39053                  | -----S-S A--S--T---TN---M  |
| <i>Homo sapiens</i>                 | NP_001257941                         | -----S-S A--S--T---TN---M |                            |

**Supplementary Figure 47.** Partial sequence alignments of an ETS (E26 transformation-specific) class transcription factor protein with a CSI consisting of a 1 aa insertion (shown in black box) that is specific for the Chromadorea class. There are two homologs of this protein in the Chromadorea class, one of which contains the CSI. The CSI is not present in species of the Enoplea class and in any non-nematode outgroup.

|                                     |                                      | 93                             | 122                                     |
|-------------------------------------|--------------------------------------|--------------------------------|-----------------------------------------|
| Chromadorea<br>homolog 1<br>(34/34) | <i>Dictyocaulus viviparus</i>        | KJH46562                       | HAPGCKLLLSGI <b>N</b> WDYHSVDTLRIYFEKFG |
|                                     | <i>Oesophagostomum dentatum</i>      | KHJ99864                       | Q-----L - - - - -R-----V-----           |
|                                     | <i>Caenorhabditis elegans</i>        | NP_741785                      | P-----N--T NGV---S-V---T--              |
|                                     | <i>Caenorhabditis brenneri</i>       | EGT31853                       | PL--Y-----V MRV-CI-F-LR--NTY-           |
|                                     | <i>Caenorhabditis briggsae</i>       | XP_002644659                   | PS-----T SGV---S-V---T--                |
|                                     | <i>Caenorhabditis latens</i>         | OZG25695                       | P-----T GGV---S-V---T--                 |
|                                     | <i>Caenorhabditis remanei</i>        | XP_003117544                   | P-----T SGI---S-V---T--                 |
|                                     | <i>Ancylostoma ceylanicum</i>        | EPB71169                       | Q-----L - - - - -R-----                 |
|                                     | <i>Ancylostoma duodenale</i>         | KIH66985                       | Q-----L - - - - -R-----                 |
|                                     | <i>Haemonchus contortus</i>          | CDJ83341                       | QS-----L - - - - -R-----                |
|                                     | <i>Necator americanus</i>            | XP_013302959                   | Q-----L - - - - -R-----                 |
|                                     | <i>Angiostrongylus costaricensis</i> | VDM52269                       | -----L - - - - -T-----                  |
|                                     | <i>Nippostrongylus brasiliensis</i>  | VDL71477                       | Q-----L - - - - -R-----                 |
|                                     | <i>Strongylus vulgaris</i>           | VDM74679                       | Q-----L - - - - -R-----V-----           |
|                                     | <i>Ancylostoma caninum</i>           | RCN42914                       | Q-----L - - - - -R-----                 |
|                                     | <i>Diploscapter pachys</i>           | PAV85317                       | P-----L H FE-----CI-L-----              |
|                                     | <i>Pristionchus pacificus</i>        | PDM83796                       | IPQ---EVT--S C-F-T-ELM-KH----           |
|                                     | <i>Ascaris suum</i>                  | ERG84717                       | PD---S---H -E--T--V--H--DT--            |
|                                     | <i>Brugia malayi</i>                 | XP_001897671                   | PD---S---H -AW-T--D--Q--DN--            |
|                                     | <i>Loa loa</i>                       | XP_020306622                   | PD---S---H -AW-T--D--Q--DN--            |
|                                     | <i>Onchocerca flexuosa</i>           | OZC10654                       | PD---S---H -AW-T--D--Q--DN--            |
|                                     | <i>Strongyloides ratti</i>           | CEF60414                       | PST---ITI---H --F-T--GI-T--DR--         |
|                                     | <i>Toxocara canis</i>                | KHN76068                       | PD---S---H ----T--G--H--D---            |
|                                     | <i>Enterobius vermicularis</i>       | VDD93996                       | ----S---H --F-T--G--E--DS--             |
|                                     | <i>Anisakis simplex</i>              | VDK45885                       | ----S---H --F-T--E--H--DT--             |
|                                     | <i>Litomosoides sigmodontis</i>      | VDK85343                       | S---S---H -AW-T--D--Q--D---             |
|                                     | <i>Brugia pahangi</i>                | VDN92749                       | ----S---H -AW-T--D--Q--DN--             |
|                                     | <i>Onchocerca ochengi</i>            | VDK66688                       | ----S---H -AW-T--D--Q--DN--             |
|                                     | <i>Acanthocheilonema viteae</i>      | VBB25398                       | ----S---H -AW-T--D--Q--DN--             |
|                                     | <i>Caenorhabditis nigoni</i>         | PIC18338                       | S-----N--T SGV---S-V---T--              |
|                                     | <i>Gongylonema pulchrum</i>          | VDN34668                       | ----S---H -AW-T--D--Q--DS--             |
|                                     | <i>Thelazia callipaeda</i>           | VDN00755                       | ----S---H -AR-T--D--Q--DN--             |
|                                     | <i>Dracunculus medinensis</i>        | VDN56236                       | ----F---Y SSK----I--R--A---             |
|                                     | <i>Wuchereria bancrofti</i>          | EJW79684                       | QIFV---H -AW-T--D--Q--DN--              |
|                                     | <i>Caenorhabditis brenneri</i>       | EGT50557                       | NVSTKR-YV--V RED-TE-M-TE--S-Y-          |
|                                     | <i>Caenorhabditis briggsae</i>       | CAP25844                       | NVSTKR-YV--V RED-TEEM-SD--S-Y-          |
|                                     | <i>Caenorhabditis elegans</i>        | NP_500326                      | NVSTKR-YV--V RED-TE-M-TE--T-Y-          |
|                                     | <i>Caenorhabditis latens</i>         | OZG20332                       | NVSTKR-YV--V RED-NE-M-TD--S-Y-          |
|                                     | <i>Caenorhabditis remanei</i>        | XP_003094843                   | NVSTKR-YV--V RED-NE-M-TD--S-Y-          |
|                                     | <i>Dictyocaulus viviparus</i>        | KJH52650                       | NVSTKR-YV--V RED-TEEMFTE--S---          |
|                                     | <i>Loa loa</i>                       | XP_020307328                   | NVSSKR-YV--V REE-TEQMFEED--SQ--         |
|                                     | <i>Oesophagostomum dentatum</i>      | KHJ92511                       | NVSTKR-YV--V RED-TEEMFTE--S---          |
|                                     | <i>Onchocerca flexuosa</i>           | OZC08989                       | NVSSKR-YV--V REE-TEQMFEED--NQ--         |
|                                     | <i>Pristionchus pacificus</i>        | PDM78546                       | NVSSKR-YV--V REE-TDEQ-QD--A---          |
|                                     | <i>Wuchereria bancrofti</i>          | EJW79347                       | NISSKR-YV--V REE-TE-MFKEH-G-Y-          |
| <i>Toxocara canis</i>               | KHN82967                             | NISSKR-YV--V RED-TE-MFKDH-G-Y- |                                         |
| <i>Trichinella britovi</i>          | KRY59221                             | -ISVK-VYI---K-E-TE-M--E--MQY-  |                                         |
| <i>Trichinella murrelli</i>         | KRX44628                             | -ISVK-VYI---K-E-TE-M--E--MQY-  |                                         |
| <i>Trichinella nativa</i>           | KRZ57303                             | -ISVK-VYI---K-E-TE-M--E--MQY-  |                                         |
| <i>Trichinella nelsoni</i>          | KRX20916                             | -ISVK-VYI---K-E-TE-M--E--MQY-  |                                         |
| <i>Trichinella papuae</i>           | KRZ68309                             | -ISVK-VYI---K-E-TE-M--E--MQY-  |                                         |
| <i>Trichinella patagoniensis</i>    | KRY20454                             | -ISVK-VYI---K-E-TE-M--E--MQY-  |                                         |
| <i>Trichinella pseudospiralis</i>   | KRZ44360                             | -ISVK-VYI---K-E-TE-M--E--MQY-  |                                         |
| <i>Trichinella spiralis</i>         | XP_003381660                         | -ISVK-VYI---K-E-TE-M--E--MQY-  |                                         |
| <i>Trichinella zimbabwensis</i>     | KRZ13867                             | -ISVK-VYI---K-E-TE-M--E--MQY-  |                                         |
| <i>Trichuris suis</i>               | KHJ42825                             | -VSVK-VYI---K-E-TEEM--D--S-Y-  |                                         |
| <i>Trichuris trichiura</i>          | CDW53958                             | -VSVK-VYI---K-E-TEEM--D--S-Y-  |                                         |
| <i>Acanthisitta chloris</i>         | XP_009078363                         | -VTVK--FVG--KEDTEEHH--D--EY-   |                                         |
| <i>Alligator mississippiensis</i>   | XP_014458634                         | -VTVK--FVG--KEDTEEHH--D--EY-   |                                         |
| <i>Bos taurus</i>                   | XP_015327666                         | LTVK--FVG--EDTEEHH--Y---Y-     |                                         |
| <i>Homo sapiens</i>                 | AAH00506                             | -VTVK--FVG--KEDTEEHH--D--EY-   |                                         |
| <i>Hypsibius dujardini</i>          | OQV17871                             | Q-TV--AFVG-VKEGVEESD--E--S---  |                                         |
| <i>Mus musculus</i>                 | AAI72047                             | HLTVK-I-VG--KEDTKEHH--D--QY-   |                                         |
| <i>Lucilia cuprina</i>              | KNC24965                             | NSSVK-VFVG-LKE--DEQC-KEH-QQ--  |                                         |
| <i>Xenopus laevis</i>               | P51989                               | -VTVK--FVG--KEDTEEHH--E--EY-   |                                         |
| <i>Zonotrichia albicollis</i>       | XP_005480939                         | -VTVK--FVG--KEDTEEHH--D--EY-   |                                         |

**Supplementary Figure 48.** Partial sequence alignments of a Heterogeneous nuclear ribonucleoprotein A1 protein with a CSI consisting of a 1 aa insertion (shown in black box) that is specific for the Chromadorea class. There are two homologs of this protein in the Chromadorea class, one of which contains the CSI.

|                                     |                                    | 139                                  | 171                   |                      |                     |
|-------------------------------------|------------------------------------|--------------------------------------|-----------------------|----------------------|---------------------|
| Chromadorea<br>homolog 1<br>(19/19) | <i>Necator americanus</i>          | XP_013302959                         | LRIYFEKFGSLDQVEILGDH  | RGFGFVVVFEDQKS       |                     |
|                                     | <i>Ancylostoma ceylanicum</i>      | EYB89670                             | -----                 | -----E-SA            |                     |
|                                     | <i>Ascaris suum</i>                | ERG84717                             | --H--DT--VVE-----NP   | --L-----N-S-         |                     |
|                                     | <i>Brugia malayi</i>               | CRZ22460                             | --Q--DN--TVE-----NP   | --L-----IY---E-      |                     |
|                                     | <i>Caenorhabditis brenneri</i>     | EGT30022                             | --V---T--T-----QP     | --L---IY---E-        |                     |
|                                     | <i>Caenorhabditis briggsae</i>     | CAP33098                             | --V---T--T-----QP     | --L---IY---E-        |                     |
|                                     | <i>Caenorhabditis elegans</i>      | NP_741784                            | --V---T--T-----QP     | --L---IY---E-        |                     |
|                                     | <i>Caenorhabditis latens</i>       | OZG25695                             | --V---T--T-----QP     | --L---IY---E-        |                     |
|                                     | <i>Caenorhabditis remanei</i>      | OZG07648                             | --V---T--T-----QP     | --L---IY---E-        |                     |
|                                     | <i>Dictyocaulus viviparus</i>      | KJH46562                             | -----R                | -----Y-----          |                     |
|                                     | <i>Diploscapter pachys</i>         | PAV85315                             | I-L-----NP            | --L---I--E-E-        |                     |
|                                     | <i>Haemonchus contortus</i>        | CDJ83341                             | -----R                | -----Y-----          |                     |
|                                     | <i>Loa loa</i>                     | XP_020306622                         | --Q--DN--TVE-----NP   | --L-----S-P-         |                     |
|                                     | <i>Oesophagostomum dentatum</i>    | KHJ99864                             | --V-----              | -----                |                     |
|                                     | <i>Onchocerca flexuosa</i>         | OZC10654                             | --Q--DN--TVE-----NP   | --L-----N-S-         |                     |
|                                     | <i>Pristionchus pacificus</i>      | PDM60141                             | --L-----T-----KP      | --V-----RRED         |                     |
|                                     | <i>Strongyloides ratti</i>         | CEF60414                             | I-T--DR--AVE-----NP   | --M-----E-D-         |                     |
|                                     | <i>Toxocara canis</i>              | KHN76068                             | --H--D--VVE-----NP    | --L-----E-TA         |                     |
|                                     | <i>Wuchereria bancrofti</i>        | EJW79684                             | --Q--DN--TVE-----NP   | --L-----N-S-         |                     |
|                                     | Chromadorea<br>homolog 2<br>(0/37) | <i>Caenorhabditis brenneri</i>       | EGT29982              | -HE---Q--DIEEAVVIT-R | NTQKS --Y---TMK--A- |
|                                     |                                    | <i>Caenorhabditis briggsae</i>       | XP_002644445          | -HE---Q--DIEEAVVIT-R | NTQKS --Y---TMK--A- |
|                                     |                                    | <i>Caenorhabditis latens</i>         | OZG25472              | -HE---Q--DIEEAVVIT-R | NTQKS --Y---TMK--A- |
|                                     |                                    | <i>Caenorhabditis remanei</i>        | XP_003117654          | -HE---Q--DIEEAVVIT-R | NTQKS --Y---TMK--A- |
|                                     |                                    | <i>Caenorhabditis nigoni</i>         | PIC17906              | -HE---Q--DIEEAVVIT-R | NTQKS --Y---TMK--A- |
|                                     |                                    | <i>Caenorhabditis elegans</i>        | NP_497799             | MKQ---TY-KVEDAMLMF-K | ATQRH -----T-DSDEV  |
|                                     |                                    | <i>Strongylus vulgaris</i>           | 1529521408            | -HE---Q--DIEEAVVIT-R | QTQKS --Y---TMK-RAA |
|                                     |                                    | <i>Ancylostoma duodenale</i>         | 748398207             | -HE---Q--DIEEAVVIT-R | QTQKS --Y---TMK-RAA |
|                                     |                                    | <i>Angiostrongylus costaricensis</i> | 1529411915            | -HE---Q--DIEEAVVIT-R | QTQKS --Y---TMK-RAA |
|                                     |                                    | <i>Oesophagostomum dentatum</i>      | 732742957             | -HE---Q--DIEEAVVIT-R | QTQKS --Y---TMK-RAA |
|                                     |                                    | <i>Haemonchus placei</i>             | 1535211029            | -HE---Q--DIEEAVVIT-R | QTQKS --Y---TMK-RAA |
|                                     |                                    | <i>Haemonchus contortus</i>          | 560135604             | -HE---Q--DIEEAVVIT-R | QTQKS --Y---TMK-RAA |
|                                     |                                    | <i>Heligmosomoides polygyrus</i>     | 1530613144            | -HE---Q--DIEEAVVIT-R | QTQKS --Y---TMK-RAA |
|                                     |                                    | <i>Diploscapter pachys</i>           | 1240347977            | -HE---Q--DIEEAVVIT-R | QTQKS --Y---TMK-RAA |
| <i>Ancylostoma ceylanicum</i>       |                                    | 510862001                            | -HE---Q--DIEEAVVIT-R  | QTQKS --Y---TMK-RAA  |                     |
| <i>Dictyocaulus viviparus</i>       |                                    | 768182347                            | -HE---Q--DIEEAVVIT-R  | QTQKS --Y---TMK-RAA  |                     |
| <i>Nippostrongylus brasiliensis</i> |                                    | 1529650831                           | -HE---Q--DIEEAVVIT-R  | QTQKS --Y---TMK-RAA  |                     |
| <i>Necator americanus</i>           |                                    | 915279951                            | -HE---Q--DIEEAVVIT-R  | QTQKS --Y---TMK-RAA  |                     |
| <i>Toxocara canis</i>               |                                    | 1535096396                           | -HE---Q--EIEEAVVIT-R  | QTQKS --Y---TMK-RAA  |                     |
| <i>Ancylostoma caninum</i>          |                                    | 1432398790                           | -HE---Q--DIEEAVVIT-R  | QTQKS --Y---TMK-RAA  |                     |
| <i>Enterobius vermicularis</i>      |                                    | 1529000477                           | -HE---Q--EIEEAVVIT-R  | QTQKS --Y---TMK-RA-  |                     |
| <i>Onchocerca ochengi</i>           |                                    | 1528797026                           | -HE---Q--EIEEAVVIT-R  | QTQKS --Y---TMK-RAA  |                     |
| <i>Litomosoides sigmodontis</i>     |                                    | 1528633243                           | -HE---Q--EIEEAVVIT-R  | QTQKS --Y---TMK-RAA  |                     |
| <i>Dracunculus medinensis</i>       |                                    | 1535172495                           | -HE---Q--EIEEAVVIT-R  | QTQKS --Y---TMK--AA  |                     |
| <i>Loa loa</i>                      |                                    | 1158600458                           | -HE---Q--EIEEAVVIT-R  | QTQKS --Y---TMK-RAA  |                     |
| <i>Acanthocheilonema viteae</i>     |                                    | 1511224209                           | -HE---Q--EIEEAVVIT-R  | QTQKS --Y---TMK-RAA  |                     |
| <i>Anisakis simplex</i>             |                                    | 1528893083                           | -HE---Q--EIEEAVVIT-R  | QTQKS --Y---TMK-RAA  |                     |
| <i>Thelazia callipaeda</i>          |                                    | 1528655218                           | -HE---Q--EIEEAVVIT-R  | QTQKS --Y---TMK-RVA  |                     |
| <i>Wuchereria bancrofti</i>         |                                    | 1528678708                           | -HE---Q--EIEEAVVIT-R  | QTQKS --Y---TMK-RVA  |                     |
| <i>Brugia pahangi</i>               |                                    | 1528772760                           | -HE---Q--EIEEAVVIT-R  | QTQKS --Y---TMK-RVA  |                     |
| <i>Brugia malayi</i>                |                                    | 170577719                            | -HE---Q--EIEEAVVIT-R  | QTQKS --Y---TMK-RVA  |                     |
| <i>Brugia timori</i>                |                                    | 1535296232                           | -HE---Q--EIEEAVVIT-R  | QTQKS --Y---TMK-RVA  |                     |
| <i>Pristionchus pacificus</i>       |                                    | 1253290953                           | -HE---Q--EIEEAVVIT-R  | QTQKS --Y---TMK-RPA  |                     |
| <i>Soboliphyme baturini</i>         | 1535368442                         | --Q--Q--DIEEAVVIT-R                  | QTGKS --Y---TMKERS-   |                      |                     |
| <i>Strongyloides ratti</i>          | 1376136874                         | -HEF--VY-DIEEAVVIT-R                 | VTQKS --Y---TMK-RAA   |                      |                     |
| <i>Teladorsagia circumcincta</i>    | 1276837198                         | --D--GR--EVNECMVMR-P                 | ATKRA -----IT-V-PA-   |                      |                     |
| <i>Onchocerca flexuosa</i>          | 1528692356                         | -KAA--S--EISEAKVIR-P                 | HTLKS K-Y---S-PF-E-   |                      |                     |
| Other Nematodes<br>(0/13)           | <i>Trichinella pseudospiralis</i>  | 954298993                            | --E---Q--EIEEAVVIT-R  | QTGKS --Y---TMK-RP-  |                     |
|                                     | <i>Trichinella papuae</i>          | 954590396                            | --E---Q--EIEEAVVIT-R  | QTGKS --Y---TMK-RP-  |                     |
|                                     | <i>Trichinella zimbabwensis</i>    | 954482541                            | --E---Q--EIEEAVVIT-R  | QTGKS --Y---TMK-RP-  |                     |
|                                     | <i>Trichinella sp. T8</i>          | 954617935                            | --EH--QY-EIEEAVVIT-R  | QTGKS --Y---TMK-RP-  |                     |
|                                     | <i>Trichinella patagoniensis</i>   | 954337818                            | --EH--QY-EIEEAVVIT-R  | QTGKS --Y---TMK-RP-  |                     |
|                                     | <i>Trichinella nativa</i>          | 954527271                            | --EH--QY-EIEEAVVIT-R  | QTGKS --Y---TMK-RP-  |                     |
|                                     | <i>Trichinella nelsoni</i>         | 954210113                            | --EH--QY-EIEEAVVIT-R  | QTGKS --Y---TMK-RP-  |                     |
|                                     | <i>Trichinella sp. T9</i>          | 954260219                            | --EH--QY-EIEEAVVIT-R  | QTGKS --Y---TMK-RP-  |                     |
|                                     | <i>Trichinella spiralis</i>        | 954362426                            | --EH--QY-EIEEAVVIT-R  | QTGKS --Y---TMK-RP-  |                     |
|                                     | <i>Trichinella murrelli</i>        | 954252124                            | --EH--QY-EIEEAVVIT-R  | QTGKS --Y---TMK-RP-  |                     |
|                                     | <i>Trichinella sp. T6</i>          | 954293473                            | --EH--QY-EIEEAVVIT-R  | QTGKS --Y---TMK-RP-  |                     |
|                                     | <i>Trichinella britovi</i>         | 954386464                            | --EH--QY-EIEEAVVIT-R  | QTGKS --Y---TMK-RP-  |                     |
|                                     | Outgroups                          | <i>Trichuris suis</i>                | 669324980             | --E---Q--DIEEAVVIT-R | QTGKS --Y---TMKERT- |
| <i>Acropora digitifera</i>          |                                    | XP_015752827                         | --TNH--KT--VTESKLMF-K | VTNRH -----T-QTEDD   |                     |
| <i>Cicer arietinum</i>              |                                    | XP_004514931                         | M-M---Q--EILEAVVIT-K  | YTGKY K-Y---T-K-PEA  |                     |
| <i>Falco peregrinus</i>             |                                    | XP_013159650                         | -KD--S--EVVDCTLKL-P   | ITGRS -----L-KESE-   |                     |

|                       |                                                                                                                                                                          |              |                                          |
|-----------------------|--------------------------------------------------------------------------------------------------------------------------------------------------------------------------|--------------|------------------------------------------|
| Outgroups<br>(0/>100) | {<br><i>Fukomys damarensis</i><br><i>Manihot esculenta</i><br><i>Homo sapiens</i><br><i>Mus musculus</i><br><i>Saccharomyces cerevisiae</i><br><i>Priapulus caudatus</i> | XP_010627066 | -KD--S---EVVDCTLKL-P ITGRS -----L-KESE-  |
|                       |                                                                                                                                                                          | XP_021620866 | --E--QA--EVVEAV-MK-R ATGRA -----A-PAV    |
|                       |                                                                                                                                                                          | XP_016879636 | -D--S---EIRECMVMR- P TTKRS -----T-A-PA-  |
|                       |                                                                                                                                                                          | BAC27370     | -D--S---EIRECMVMR- P TTKRS -----T-T-PA-  |
|                       |                                                                                                                                                                          | GAX68065     | --E--G-Y-TVTDLK-MK-P ATGRS -----LS--KPS- |
|                       |                                                                                                                                                                          | XP_014673197 | --E--S---EVTECMVMR-P TTKRS -----TYGNPEA  |

**Supplementary Figure 49.** Partial sequence alignments of a Heterogeneous nuclear ribonucleoprotein A1 protein with a CSI consisting of a 5 aa deletion (shown in black box) that is specific for the Chromadorea class. The CSI is not present in any non-nematode outgroup. There are two homologs of this protein in the *Caenorhabditis* genus, under the Chromadorea class, one of which contains the CSI.

|                              |                                 | 221                         | 252                              |                                 |
|------------------------------|---------------------------------|-----------------------------|----------------------------------|---------------------------------|
| Chromadorea<br>(29/31)       | <i>Caenorhabditis brenneri</i>  | EGT30339                    | EEFKMKDGGKSTT                    |                                 |
|                              | <i>Caenorhabditis briggsae</i>  | XP_002644390                | -----A---                        |                                 |
|                              | <i>Caenorhabditis elegans</i>   | NP_508610                   | -----T-----A---                  |                                 |
|                              | <i>Caenorhabditis latens</i>    | OZG25613                    | -----T-----A---                  |                                 |
|                              | <i>Caenorhabditis remanei</i>   | XP_003117797                | -----T-----A---                  |                                 |
|                              | <i>Ancylostoma ceylanicum</i>   | EPB80520                    | -----A-I--H-FK-Y-ASA---          |                                 |
|                              | <i>Ascaris suum</i>             | ERG79363                    | -----E--A--R-YA--N-YI--Q---      |                                 |
|                              | <i>Brugia malayi</i>            | XP_001891554                | ---R--E---I--HS--NKYI--Q---      |                                 |
|                              | <i>Dictyocaulus viviparus</i>   | KJH43166                    | ---R--E--RA-I--R-H--FK-Y--AAA--- |                                 |
|                              | <i>Haemonchus contortus</i>     | CDJ91770                    | -----E--A-I--R-H--FK-Y--AAA---   |                                 |
|                              | <i>Loa loa</i>                  | XP_020301888                | ---R--E---I--HS--NKYI--Q---      |                                 |
|                              | <i>Necator americanus</i>       | XP_013290523                | -----E--A-I--H--FK-Y--AAA---     |                                 |
|                              | <i>Oesophagostomum dentatum</i> | KHJ99479                    | -----E--A-I--Q--FN---PA---       |                                 |
|                              | <i>Onchocerca flexuosa</i>      | OZC07703                    | ---R--E---I--HS--NKYI--Q---      |                                 |
|                              | <i>Toxocara canis</i>           | KHN74888                    | -----E--A-I--R-HT--N-YI--Q---    |                                 |
|                              | <i>Wuchereria bancrofti</i>     | EJW88279                    | ---R--E---I--HS--NKYI--Q---      |                                 |
|                              | <i>Diploscapter pachys</i>      | PAV84640                    | ---NI--P--LK--H--K----QA---      |                                 |
|                              | <i>Ancylostoma ceylanicum</i>   | EPB80520                    | -----A-I--H--FK-Y--ASA---        |                                 |
|                              | <i>Ascaris suum</i>             | ERG79363                    | -----E--A--R-YA--N-YI--Q---      |                                 |
|                              | <i>Brugia malayi</i>            | XP_001891554                | ---R--E---I--HS--NKYI--Q---      |                                 |
|                              | <i>Dictyocaulus viviparus</i>   | KJH43166                    | ---R--E--RA-I--R-H--FK-Y--AAA--- |                                 |
|                              | <i>Haemonchus contortus</i>     | CDJ91770                    | -----E--A-I--R-H--FK-Y--AAA---   |                                 |
|                              | <i>Loa loa</i>                  | XP_020301888                | ---R--E---I--HS--NKYI--Q---      |                                 |
|                              | <i>Necator americanus</i>       | XP_013290523                | -----E--A-I--H--FK-Y--AAA---     |                                 |
|                              | <i>Oesophagostomum dentatum</i> | KHJ99479                    | -----E--A-I--Q--FN---PA---       |                                 |
|                              | <i>Onchocerca flexuosa</i>      | OZC07703                    | ---R--E---I--HS--NKYI--Q---      |                                 |
|                              | <i>Toxocara canis</i>           | KHN74888                    | -----E--A-I--R-HT--N-YI--Q---    |                                 |
|                              | <i>Wuchereria bancrofti</i>     | EJW88279                    | ---R--E---I--HS--NKYI--Q---      |                                 |
|                              | <i>Diploscapter pachys</i>      | PAV84640                    | ---NI--P--LK--H--K----QA---      |                                 |
|                              | <i>Pristionchus pacificus</i>   | PDM77096                    | -----N--KK---G-LR-               |                                 |
|                              | <i>Strongyloides ratti</i>      | CEF63735                    | -----E---YN--LH--DLYIH-DGS-Q     |                                 |
|                              | Outgroups<br>(0/>100)           | <i>Acanthisitta chloris</i> | XP_009078988                     | -----I-SQS-MVS--KK-FA-YI-IQ-C-- |
|                              |                                 | <i>Amazona aestiva</i>      | KQK83323                         | -----I-SQS-MVS--KK-FA-YI-IQ-C-- |
| <i>Chelonia mydas</i>        |                                 | EMP31408                    | --Y--I-SQS-MVS--KK-FA-YI-IQ-C--  |                                 |
| <i>Danio rerio</i>           |                                 | XP_017211556                | -DY--I-SQS-M-S--KK-FA--I-IQ-C--  |                                 |
| <i>Daphnia magna</i>         |                                 | KZS19170                    | -DY-HL- PQ-MA--QR--ND--VQAS--    |                                 |
| <i>Homo sapiens</i>          |                                 | 20J4_A                      | -D--V-SQS-MAS--KK-FA-YI-IQAC--   |                                 |
| <i>Mus musculus</i>          |                                 | NP_001334044                | -----TRSTA-LV--HR-FE--DVQA-R-    |                                 |
| <i>Xiphophorus maculatus</i> |                                 | XP_005802346                | --Y--I-SST-LVS--NK-FK--IEVQ--R-  |                                 |

**Supplementary Figure 50.** Partial sequence alignments of a Regulator of G-protein signaling 7 protein with a CSI consisting of a 1 aa insertion (shown in black box) that is specific for the Chromadorea class. The CSI is not present in any non-nematode outgroup. The CSI is not present in the species *Pristionchus pacificus* and *Strongyloides ratti*.

|  |                                      | 210          | 245                                       |
|--|--------------------------------------|--------------|-------------------------------------------|
|  | <i>Caenorhabditis elegans</i>        | NP_001294068 | GQRIVGVNGLIYPTT G HKEVVALIKKDTMKTLLLV     |
|  | <i>Caenorhabditis briggsae</i>       | CAP38400     | -----N- - -D-----N-----                   |
|  | <i>Caenorhabditis brenneri</i>       | EGT34238     | -----E----- - -S-----N-----               |
|  | <i>Caenorhabditis latens</i>         | OZG08793     | -----E---N- - -S-----N-----               |
|  | <i>Caenorhabditis remanei</i>        | XP_003101224 | -----E---N- - -S-----N-----               |
|  | <i>Caenorhabditis nigoni</i>         | PIC32830     | -----N- - -S-----N-----                   |
|  | <i>Haemonchus contortus</i>          | CDJ86857     | -----V-V--N- P - - -Q- -RSPLR-----        |
|  | <i>Diploscapter pachys</i>           | PAV68526     | -----DT-V--- P - - - - -RSSLQ-----        |
|  | <i>Pristionchus pacificus</i>        | PDM75425     | A-----I--H- - P - - - - -NPVS-----        |
|  | <i>Strongyloides ratti</i>           | CEF59908     | -----I-N-I---N- P - - - -T- -RTPLEAR---   |
|  | <i>Toxocara canis</i>                | KHN71588     | -----S----- P - - - -G- -MNPLQ-D---       |
|  | <i>Wuchereria bancrofti</i>          | EJW83604     | -----S- - - - - A - - - -S- - -NPLR-E---  |
|  | <i>Brugia malayi</i>                 | XP_001899140 | -----S- - - - - A - - - -S- - -NPLR-E---  |
|  | <i>Loa loa</i>                       | XP_020302439 | -----S- - - - - A - - - -S- - -NPLR-E---  |
|  | <i>Ancylostoma duodenale</i>         | KIH63028     | -----V-V--N- P - - - -Q- -RSPLR-----      |
|  | <i>Ancylostoma ceylanicum</i>        | EYC04072     | -----V-V--N- P - - - -Q- -RSPLR-----      |
|  | <i>Brugia pahangi</i>                | VDN81659     | -----S- - - - - A - - - -S- - -NPLR-E---  |
|  | <i>Brugia timori</i>                 | VDO28175     | -----S- - - - - A - - - -S- - -NPLR-E---  |
|  | <i>Onchocerca ochengi</i>            | VDK65450     | -----S- - - - - A - - - -S- - -NPLR-E---  |
|  | <i>Litomosoides sigmodontis</i>      | VDK77581     | -----S- - - - - A - - - -S- - -TNPLR-E--- |
|  | <i>Dracunculus medinensis</i>        | VDN52796     | -----Y- - - - - P - - -D-S- - -M-PLR-D--- |
|  | <i>Heligmosomoides polygyrus</i>     | VDP23533     | -----V-V--N- P - - - -Q- -RSPLR-----      |
|  | <i>Anisakis simplex</i>              | VDK51478     | -----H----- P - - - -G- -MNPLQ-D---       |
|  | <i>Haemonchus placei</i>             | VDO07548     | -----V-V--N- P - - - -Q- -RSPLR-----      |
|  | <i>Nippostrongylus brasiliensis</i>  | VDL66851     | -----V-V--N- P - - - -H- -RSPLR-----      |
|  | <i>Angiostrongylus costaricensis</i> | VDM53718     | -----V-V--N- P - - - -Q- -RSPLR-----      |
|  | <i>Teladorsagia circumcincta</i>     | PI064747     | -----M-V--N- P - - - -Q- -RSPLR-----      |
|  | <i>Ancylostoma caninum</i>           | RCN49057     | -----V-V--N- P - - - -Q- -RSPLR-----      |
|  | <i>Necator americanus</i>            | XP_013301750 | -----V-V--N- P - - - -Q- -RSPLR-----      |
|  | <i>Dictyocaulus viviparus</i>        | KJH47934     | -----V-V--N- P - - - -Q- -RSPLC-----      |
|  | <i>Enterobius vermicularis</i>       | VDD95482     | -----K---S- P YRD- - - -ENPLV-E---        |
|  | <i>Soboliphyme baturini</i>          | VDP38301     | -----S-VFVD- P - - - -K- -QQPASVE---      |
|  | <i>Oesophagostomum dentatum</i>      | KHJ91366     | -----V-V--N- P - - - -Q- -RSPLR-----      |
|  | <i>Onchocerca flexuosa</i>           | OZC04861     | -----S- - - - - A - - - -S- - -NPLR-E---  |
|  | <i>Trichinella patagoniensis</i>     | KRY22666     | -----NT--VSS S - - -D-R- - -Q-PSGVQ---    |
|  | <i>Trichinella papuae</i>            | KRZ78304     | -----NT--VSS S - - -D-R- - -Q-PSGVQ---    |
|  | <i>Trichinella pseudospiralis</i>    | KRY00923     | -----NT--VSS S - - -D-R- - -Q-PSGVQ---    |
|  | <i>Trichinella spiralis</i>          | XP_003374528 | -----NT--VSS S - - -D-R- - -Q-PSGVQ---    |
|  | <i>Trichinella murrelli</i>          | KRX50132     | -----NT--VSS S - - -D-R- - -Q-PSGVQ---    |
|  | <i>Trichinella nativa</i>            | KRZ61057     | -----NT--VSS S - - -D-R- - -Q-PSGVQ---    |
|  | <i>Trichuris trichiura</i>           | CDW52236     | -----QTI--I-S S - - -D-R- - -Q-P-QVE---   |
|  | <i>Trichuris suis</i>                | KFD54368     | -----QT--I-S S - - -D-R- - -Q-P-QVE---    |
|  | <i>Dictyocaulus viviparus</i>        | KJH47935     | -D--FA--HS-IGES - - -K-ER--ENAVRCEM--     |
|  | <i>Ancylostoma ceylanicum</i>        | EPB74572     | -D--FA--HS-IGES - - -K-ER--ENAI RC EM--   |
|  | <i>Necator americanus</i>            | XP_013301751 | -D--YA--HS-IGES - - -K-ER--ENAVRCEM--     |
|  | <i>Haemonchus contortus</i>          | CDJ86857     | -D--FA--HS-IGES - - -K-ER--ENATRC EM--    |
|  | <i>Caenorhabditis nigoni</i>         | PIC32832     | -D--FA--HS-IGEN - - -K-ER--ANPNRC EM--    |
|  | <i>Caenorhabditis remanei</i>        | OZF76366     | -D--FA--HS-IGEN - - -K-ER--ANPNRC EM--    |
|  | <i>Caenorhabditis latens</i>         | OZG08787     | -D--FA--HS-IGEN - - -K-ER--ANPNRC EM--    |
|  | <i>Caenorhabditis elegans</i>        | NP_001294068 | -D--FA--HS-IGEN - - -K-ER--ANPNRC EM--    |
|  | <i>Caenorhabditis briggsae</i>       | CAP38400     | -D--FA--HS-IGEN - - -K-ER--ANPNRC EM--    |
|  | <i>Caenorhabditis brenneri</i>       | EGT34238     | -D--YA--HS-IGEN - - -K-ER--SNPNRC EM--    |
|  | <i>Diploscapter pachys</i>           | PAV68526     | -D--FA--S-VGEN - - -K-ER--QNPNC EM--      |
|  | <i>Pristionchus pacificus</i>        | PDM75425     | -D--FA--VS-QGE - - -K-ER--Q-P-RCE---      |
|  | <i>Strongyloides ratti</i>           | CEF59908     | -D--FA--A-VQGES - - -Q-IQR--ENPLQCE---    |
|  | <i>Toxocara canis</i>                | KHN71588     | -D--FA--HS-IGEN - - -Q-QR--ENPLQCE---     |
|  | <i>Ancylostoma duodenale</i>         | KIH63027     | -D--FA--HS-IGES - - -K-ER--ENAI RC EM--   |
|  | <i>Heligmosomoides polygyrus</i>     | VDO87852     | -D--FA--HS-VGES - - -K-ER--ENAVRC EM--    |
|  | <i>Ancylostoma caninum</i>           | RCN49058     | -D--FA--HS-IGES - - -K-ER--ENAI RC EM--   |
|  | <i>Haemonchus placei</i>             | VDO77662     | -D--FA--HS-IGES - - -K-ER--ENATRC EM--    |
|  | <i>Angiostrongylus costaricensis</i> | VDM53717     | -D--FA--HN-IGES - - -K-ER--ENALRC EM--    |
|  | <i>Nippostrongylus brasiliensis</i>  | VDL68338     | -D--FA--HS-SGES - - -K-ER--ENSTRCE M--    |
|  | <i>Anisakis simplex</i>              | VDK51478     | -D--FA--HS-IGEN - - -R-ER--ENPLQCE---     |
|  | <i>Enterobius vermicularis</i>       | VDD95482     | -D--YA--N-VGES - - -RQ--QK--ENPLRCE---    |
|  | <i>Thelazia callipaeda</i>           | VDM97278     | -D--FA--HS-VGLN - - -RQ--QR--ENPLQCE---   |
|  | <i>Dracunculus medinensis</i>        | VDN52796     | -DY-YA--VS-IGEN - - -Q--QR--ENPLHCE---    |
|  | <i>Litomosoides sigmodontis</i>      | VDK77581     | -D-VLV--HC-IDEN - - -K--QR--ENPLQCE-I-    |
|  | <i>Oesophagostomum dentatum</i>      | KHJ82768     | -D-VV-A--FPVLAES - - -AL-D-MSSQLNLCLV-L   |
|  | <i>Ancylostoma ceylanicum</i>        | EYC04066     | -D--FA--HS-IGES - - -K-ER--ENAI RC EM--   |
|  | <i>Trichinella patagoniensis</i>     | KRY22666     | -D--A--VYVADQP - - -D--K--E-PLQCR-T-      |
|  | <i>Trichinella papuae</i>            | KRZ78304     | -D--A--VYVADQP - - -D--K--E-PLQCR-T-      |
|  | <i>Trichinella pseudospiralis</i>    | KRY00923     | -D--A--VYVADQP - - -D--K--E-PLQCR-T-      |
|  | <i>Trichinella spiralis</i>          | XP_003374528 | -D--A--VYVADQP - - -D--K--E-PLQCR-T-      |
|  | <i>Trichinella murrelli</i>          | KRX50132     | -D--A--VYVADQP - - -D--K--E-PLQCR-T-      |
|  | <i>Trichinella nativa</i>            | KRZ61057     | -D--A--IYVADQP - - -D--K--E-PLQCR-T-      |
|  | <i>Trichuris trichiura</i>           | CDW52236     | -D--A--TSVAELS - - -R--E-PL-CR-T-         |
|  | <i>Trichuris suis</i>                | KFD54368     | -D--A--TPVAELS - - -R--E-PL-CR-T-         |

Nematoda  
homolog 1  
(42/42)

Nematoda  
homolog 2  
(0/35)

|                       |   |                                    |              |                  |                     |
|-----------------------|---|------------------------------------|--------------|------------------|---------------------|
| Outgroups<br>(0/>200) | } | <i>Acanthochromis polyacanthus</i> | XP_022058038 | -D-L-F--EDVENES  | -QQ--SR-RATEGRLE-I- |
|                       |   | <i>Aedes albopictus</i>            | KXJ71430     | -D--IE---TN-TTE- | --K--E---GVPNE-K--- |
|                       |   | <i>Aethina tumida</i>              | XP_019865902 | -D--LE---ES-ANK- | --Q--E---AQSGE-K--- |
|                       |   | <i>Agrilus planipennis</i>         | XP_018333727 | -D--LE---ES-ADKS | --Q--EA--ALPNE-K--- |
|                       |   | <i>Homo sapiens</i>                | AAH14513     | -D-L-E---VNVEGE- | -HQ--QR--AVEGQ-R--- |
|                       |   | <i>Octopus bimaculoides</i>        | KOF98109     | -D--IE---VN-GNEN | -QQ--QR--AGGEE-R--- |
|                       |   | <i>Mus musculus</i>                | AAD49224     | -D-L-E---ENVEKE- | -QQ--SR-RAALNAVR--- |
|                       |   | <i>Rhinolophus sinicus</i>         | XP_019568739 | -D-L-E---VNVEGE- | -HQ--QR--AVEGQ-Q--- |
|                       |   | <i>Salmo salar</i>                 | XP_014058979 | -D-L-F---ENVESES | -QQ--SR-RATVGQLE-I- |

**Supplementary Figure 51.** Partial sequence alignments of an Na(+)/H(+) Exchange Regulatory Factor protein with a CSI consisting of a 1 aa insertion (shown in black box) that is specific for the entire Nematoda phylum. The CSI is not present in any non-nematode outgroup. There are two homologs of this protein in all Nematoda species, one of which contains the CSI.
